# Supplementary material for: Reaction of SO 3 with H 2 SO 4 and its implications for aerosol particle formation in the gas phase and at the air–water interface
Source: Copernicus journal article supplement (doi:10.5194/acp-24-4029-2024), 2024-04-04
Supplement: Supplementary file 1 [file acp-24-4029-2024-supplement.pdf]

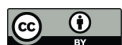

*Supplement of*

## **Reaction of $\text{SO}_3$ with $\text{H}_2\text{SO}_4$ and its implications for aerosol particle formation in the gas phase and at the air–water interface**

**Rui Wang et al.**

*Correspondence to:* Tianlei Zhang (ztianlei88@163.com) and Hao Li (haol@rcees.ac.cn)

The copyright of individual parts of the supplement might differ from the article licence.

**Figure S1** Schematic energy diagrams for the formation of H<sub>2</sub>SO<sub>4</sub> from the SO<sub>3</sub> + H<sub>2</sub>O reaction without and with H<sub>2</sub>O at the CCSD(T)-F12/cc-pVDZ-F12//M06-2X/6-311++G(2df,2pd) level of theory

**Table S1** Relative energies ( $\Delta E$  and  $\Delta(E + ZPE)$ /(kcal·mol<sup>-1</sup>)), enthalpies ( $\Delta H$ /(kcal·mol<sup>-1</sup>)), entropy ( $S(298\text{ K})$ /(cal·mol<sup>-1</sup>·K<sup>-1</sup>)) and free energies ( $\Delta G(298\text{ K})$ /(kcal·mol<sup>-1</sup>)) for the reactants, intermediates, transition states and products involved in the reaction of SO<sub>3</sub> + H<sub>2</sub>SO<sub>4</sub> without and with H<sub>2</sub>O along with the hydrolysis reaction of SO<sub>3</sub> without and with H<sub>2</sub>O

**Table S2** Equilibrium constants (cm<sup>3</sup>·molecule<sup>-1</sup>) for SO<sub>3</sub>···H<sub>2</sub>SO<sub>4</sub>, SO<sub>3</sub>···H<sub>2</sub>O, H<sub>2</sub>SO<sub>4</sub>···H<sub>2</sub>O and (H<sub>2</sub>O)<sub>2</sub> within the temperature range of 280-320 K

**Table S3** Concentrations (molecules·cm<sup>-3</sup>) of H<sub>2</sub>O and H<sub>2</sub>SO<sub>4</sub> within the temperature range of 280-320 K

### **Part 1 The calculation details of high-pressure-limit (HPL) rate constants**

**Table S4** The high-pressure limiting rate constants (cm<sup>3</sup>·molecule<sup>-1</sup>·s<sup>-1</sup>) for the reactants to pre-reactive complex process in the SO<sub>3</sub> + H<sub>2</sub>SO<sub>4</sub> reaction without and with H<sub>2</sub>O, and the hydrolysis of SO<sub>3</sub> without and with H<sub>2</sub>O calculated by the master equation within the temperature range of 280-320 K

### **Part 2 The details of Master Equation Solver for Multi-Energy Well Reactions**

**Table S5** Rate constants (cm<sup>3</sup>·molecule<sup>-1</sup>·s<sup>-1</sup>) for the SO<sub>3</sub> + H<sub>2</sub>SO<sub>4</sub> reaction with H<sub>2</sub>O and the hydrolysis of SO<sub>3</sub> without and with H<sub>2</sub>O within the temperature range of 280-320 K

**Table S6** The rate constant (cm<sup>3</sup>·molecule<sup>-1</sup>·s<sup>-1</sup>) for the SO<sub>3</sub> + H<sub>2</sub>SO<sub>4</sub> reaction for the SO<sub>3</sub> + H<sub>2</sub>SO<sub>4</sub> reaction without and with H<sub>2</sub>O within the temperature range of 280-320 K by using transition state theory

### **Part 3 Calculations of effective rate constants**

**Table S7** The rate ratio between the SO<sub>3</sub> + H<sub>2</sub>SO<sub>4</sub> reaction and the hydrolysis of SO<sub>3</sub> within the temperature range of 280-320 K at 0 km altitude

**Table S8** The rate ratio between the SO<sub>3</sub> + H<sub>2</sub>SO<sub>4</sub> reaction and the hydrolysis of SO<sub>3</sub> within the altitude range of 5-30 km in the atmospheres of Earth

### **Part 4 The details of the equilibrium process for the droplet system with 191 water molecules**

**Figure S2** The z coordinates of SO<sub>3</sub> (A), H<sub>2</sub>SO<sub>4</sub> (B) and H<sub>2</sub>S<sub>2</sub>O<sub>7</sub> (C) molecule as the function of simulation time, (a) the density profile of water (b) and the pie chart with the occurrence percentages (c) at the air-water interface and in water phase

**Figure S3** Snapshot structures taken from the BOMD simulations of H<sub>2</sub>SO<sub>4</sub> reaction at the air-water interface. The white, red and yellow spheres represent H, O and S atoms, respectively

**Figure S4** Two BOMD trajectories and snapshots for H<sub>2</sub>O-induced the formation of S<sub>2</sub>O<sub>7</sub><sup>2-</sup>•••H<sub>3</sub>O<sup>+</sup> ion pair from the reaction of SO<sub>3</sub> with HSO<sub>4</sub><sup>-</sup> at the air-water interface (Top panel: Snapshot structures taken from the BOMD simulations, which illustrate H<sub>2</sub>O-induced the formation of S<sub>2</sub>O<sub>7</sub><sup>2-</sup>•••H<sub>3</sub>O<sup>+</sup> ion pair from the reaction of SO<sub>3</sub> with HSO<sub>4</sub><sup>-</sup> at the air-water interface. Lower panel: time evolution of key bond distances (S-O1, O2-H1, and O3-H1) involved in the induced mechanism.)

**Figure S5** Two BOMD trajectories and snapshots for the direct HSO<sub>4</sub><sup>-</sup>-mediated formation of HSO<sub>4</sub><sup>-</sup>•••H<sub>3</sub>O<sup>+</sup> ion pair at the air water interface (Top panel: Snapshot structures taken from the BOMD simulations, which illustrate the direct HSO<sub>4</sub><sup>-</sup>-mediated formation of HSO<sub>4</sub><sup>-</sup>•••H<sub>3</sub>O<sup>+</sup> ion pair at the air water interface. Lower panel: time evolution of key bond distances (S1-O1, O1-H1 and H1-O2) involved in the hydration mechanism.)

**Figure S6** Two BOMD trajectories and snapshots for the indirect HSO<sub>4</sub><sup>-</sup>-mediated formation of HSO<sub>4</sub><sup>-</sup>•••H<sub>3</sub>O<sup>+</sup> ion pair at the air water interface (Top panel: Snapshot structures taken from the BOMD simulations, which illustrate the indirect HSO<sub>4</sub><sup>-</sup>-mediated formation of HSO<sub>4</sub><sup>-</sup>•••H<sub>3</sub>O<sup>+</sup> ion pair at the air water interface. Lower panel: time evolution of key bond distances (S1-O1, O1-H1 and H1-O2) involved in the hydration mechanism.)

**Figure S7** Two BOMD trajectories and snapshots for the deprotonation of H<sub>2</sub>S<sub>2</sub>O<sub>7</sub> at the air water interface (Top panel: Snapshot structures taken from the BOMD simulations, which illustrate the deprotonation of H<sub>2</sub>S<sub>2</sub>O<sub>7</sub> at the air water interface. Lower panel: time evolution of key bond distances (O1-H1, H1-O2, O3-H2 and H2-O4) involved in the hydration mechanism.)

**Figure S8** The optimized geometrical structures of HS<sub>2</sub>O<sub>7</sub><sup>-</sup>, S<sub>2</sub>O<sub>7</sub><sup>2-</sup> and HSO<sub>4</sub><sup>-</sup> ion at M06-2X/6-311++G(2df,2pd) level of theory

**Figure S9** The most stable configurations of the (SA)<sub>1</sub>(A)<sub>1</sub>(Acid)<sub>1</sub> clusters identified at the M06-2X/6-311++G(2df,2pd) level of theory. SA<sup>-</sup>, SA, A, MOA, GSA, MHS, ASP and GA are respectively HS<sub>2</sub>O<sub>4</sub><sup>-</sup>, H<sub>2</sub>SO<sub>4</sub>, NH<sub>3</sub>, HOOCCH<sub>2</sub>COOH, HOCCOOSO<sub>3</sub>H, CH<sub>3</sub>OSO<sub>3</sub>H, HOCC(H)NH<sub>2</sub>COOH and HOCH<sub>2</sub>COOH. The lengths of hydrogen bonds are given in Å. (blue = nitrogen, yellow = sulfur, red = oxygen, gray = carbon, and white = hydrogen.)

**Table S9** Gibbs free energy ( $\Delta G$ , kcal·mol<sup>-1</sup>), equilibrium constant ( $K_{eq}$ , cm<sup>3</sup>·molecule<sup>-1</sup>) and the concentrations of SA, SO<sub>3</sub> and DSA computed at the CCSD(T)-F12/cc-pVDZ-F12//M06-2X/6-311++G(2df,2pd) level of theory

## Part 5 Atmospheric concentrations of DSA under different SO<sub>3</sub> scenarios

**Figure S10** Concentration (unit: molecules·cm<sup>-3</sup>) of DSA with respect to different concentrations of SO<sub>3</sub> as function of altitude. We consider the possible concentrations of SO<sub>3</sub> with the injection

of SO<sub>3</sub>.

**Figure S11** The most stable configurations of the DSA-SA-A-based clusters identified at the M06-2X/6-311++G(2df,2pd) level of theory. DSA, SA, A are the shorthand for disulfuric acid, sulfuric acid and ammonia, respectively. The lengths of hydrogen bonds are given in Å. (blue = nitrogen, yellow = sulfur, red = oxygen, gray = carbon, and white = hydrogen.)

**Table S10** The Gibbs free energy  $\Delta G$  (kcal·mol<sup>-1</sup>) of formation of all clusters at pressure of 1 atm and the temperature range of 218.15-298.15 K, calculated at DLPNO-CCSD(T)/aug-cc-pVTZ//M06-2X/6-311++G(2df,2pd) level of theory

**Figure S12** A typical actual  $\Delta G$  surface at 218.15 K. [SA] is the concentration of sulfuric acid monomers, [A] the concentration of ammonia monomers and [DSA] is disulfuric acid

**Figure S13** A typical actual  $\Delta G$  surface at 238.15 K. [SA] is the concentration of sulfuric acid monomers, [A] the concentration of ammonia monomers and [DSA] is disulfuric acid

## Part 6 Collision coefficients and evaporation coefficients

### Part 7 Enhancement factor $R$

**Table S10** Collision coefficients ( $\beta$ , cm<sup>3</sup>·s<sup>-1</sup>) for each cluster in the present study

**Table S11** Evaporation rates (s<sup>-1</sup>) of the studied clusters at different temperatures of 298.15, 278.15, 258.15, 238.15 and 218.15 K

**Table S12** Total evaporation coefficients ( $\sum\gamma$ , s<sup>-1</sup>) for each cluster in the present study

**Table S13** The formation rate  $J$  of DSA at the conditions of  $T = 218.15$  K, [SA] = 10<sup>6</sup>-10<sup>8</sup> molecules·cm<sup>-3</sup>, [A] = 10<sup>7</sup>-10<sup>11</sup> molecules·cm<sup>-3</sup>, and [DSA] = 0, 10<sup>4</sup>-10<sup>7</sup> molecules·cm<sup>-3</sup>. SA, A and DSA represent sulfuric acid, ammonia and disulfuric acid, respectively

**Table S14** The formation rate  $J$  of DSA at the conditions of  $T = 238.15$  K, [SA] = 10<sup>6</sup>-10<sup>8</sup> molecules·cm<sup>-3</sup>, [A] = 10<sup>7</sup>-10<sup>11</sup> molecules·cm<sup>-3</sup>, and [DSA] = 0, 10<sup>4</sup>-10<sup>7</sup> molecules·cm<sup>-3</sup>. SA, A and DSA represent sulfuric acid, ammonia and disulfuric acid, respectively

**Table S15** The formation rate  $J$  of DSA at the conditions of  $T = 258.15$  K, [SA] = 10<sup>6</sup>-10<sup>8</sup> molecules·cm<sup>-3</sup>, [A] = 10<sup>7</sup>-10<sup>11</sup> molecules·cm<sup>-3</sup>, and [DSA] = 0, 10<sup>4</sup>-10<sup>7</sup> molecules·cm<sup>-3</sup>. SA, A and DSA represent sulfuric acid, ammonia and disulfuric acid, respectively

**Table S16** The formation rate  $J$  of DSA at the conditions of  $T = 278.15$  K, [SA] = 10<sup>6</sup>-10<sup>8</sup> molecules·cm<sup>-3</sup>, [A] = 10<sup>7</sup>-10<sup>11</sup> molecules·cm<sup>-3</sup>, and [DSA] = 0, 10<sup>4</sup>-10<sup>7</sup> molecules·cm<sup>-3</sup>. SA, A

and DSA represent sulfuric acid, ammonia and disulfuric acid, respectively

**Table S17** The formation rate  $J$  of DSA at the conditions of  $T = 298.15$  K,  $[SA] = 10^6$ - $10^8$  molecules·cm<sup>-3</sup>,  $[A] = 10^7$ - $10^{11}$  molecules·cm<sup>-3</sup>, and  $[DSA] = 0, 10^4$ - $10^7$  molecules·cm<sup>-3</sup>. SA, A and DSA represent sulfuric acid, ammonia and disulfuric acid, respectively

**Figure S14** The enhancement strength  $R$  of DSA as a function of  $[DSA]$  from  $10^4$  to  $10^7$  molecules·cm<sup>-3</sup> under different temperatures (218.15, 238.15, 258.15, 278.15 and 298.15 K) where  $[SA] = 10^7$  molecules·cm<sup>-3</sup> and  $[A] = 10^9$  molecules·cm<sup>-3</sup>

**Figure S15** Simulated cluster formation rates  $J$  (cm<sup>-3</sup> s<sup>-1</sup>) as a function of (a)  $[SA]$ , (b)  $[A]$ , with different concentrations of disulfuric acid  $[DSA]$  of  $10^4$  (red),  $10^5$  (blue),  $10^6$  (green),  $10^7$  (purple) and 0 molecules·cm<sup>-3</sup> (black, pure-SA-A), at  $T = 218.15$  K

**Figure S16** Simulated cluster formation rates  $J$  (cm<sup>-3</sup> s<sup>-1</sup>) as a function of (a)  $[SA]$ , (b)  $[A]$ , with different concentrations of disulfuric acid  $[DSA]$  of  $10^4$  (red),  $10^5$  (blue),  $10^6$  (green),  $10^7$  (purple) and 0 molecules·cm<sup>-3</sup> (black, pure-SA-A), at  $T = 238.15$  K

**Figure S17** Simulated cluster formation rates  $J$  (cm<sup>-3</sup> s<sup>-1</sup>) as a function of (a)  $[SA]$ , (b)  $[A]$ , with different concentrations of disulfuric acid  $[DSA]$  of  $10^4$  (red),  $10^5$  (blue),  $10^6$  (green),  $10^7$  (purple) and 0 molecules·cm<sup>-3</sup> (black, pure-SA-A), at  $T = 278.15$  K

**Figure S18** Simulated cluster formation rates  $J$  (cm<sup>-3</sup> s<sup>-1</sup>) as a function of (a)  $[SA]$ , (b)  $[A]$ , with different concentrations of disulfuric acid  $[DSA]$  of  $10^4$  (red),  $10^5$  (blue),  $10^6$  (green),  $10^7$  (purple) and 0 molecules·cm<sup>-3</sup> (black, pure-SA-A), at  $T = 298.15$  K

**Figure S19** Particle formation rates ( $J$ , cm<sup>-3</sup>·s<sup>-1</sup>) with varying ratios of  $[DSA]:[SA]$  at 258.15 K under different A concentrations ((a) $10^7$  molecules·cm<sup>-3</sup>, (b) $10^9$  molecules·cm<sup>-3</sup>, (c) $10^{11}$  molecules·cm<sup>-3</sup>).  $[DSA] + [SA] = 10^4$ - $10^8$  molecules·cm<sup>-3</sup>

**Figure S20** (a) The main pathways of clusters growing out of the research system under the conditions where 278.15 K, and 298.15 K,  $[SA] = 10^8$  molecules·cm<sup>-3</sup>,  $[A] = 10^9$  molecules·cm<sup>-3</sup>, and  $[DSA] = 10^6$  molecules·cm<sup>-3</sup>; (b) The contribution of different concentrations of DSA to the main cluster formation pathway at 278.15 K, and 298.15 K is shown in the pie charts.

**Figure S21** The contribution of different concentrations of SA to the major cluster formation pathways at different temperatures (218.15 K, 238.15 K, 258.15 K, 278.15 K, and 298.15 K) and at  $[DSA] = 10^6$  molecules·cm<sup>-3</sup>,  $[A] = 10^9$  molecules·cm<sup>-3</sup> is shown in the pie charts.

**Figure S22** The contribution of different concentrations of A to the major cluster formation pathways at different temperatures (218.15 K, 238.15 K, 258.15 K, 278.15 K, and 298.15 K) and at  $[DSA] = 10^6$  molecules·cm<sup>-3</sup>,  $[SA] = 10^8$  molecules·cm<sup>-3</sup> is shown in the pie charts.

**Table S18.** Cartesian coordinates of all molecules and clusters in the studied system



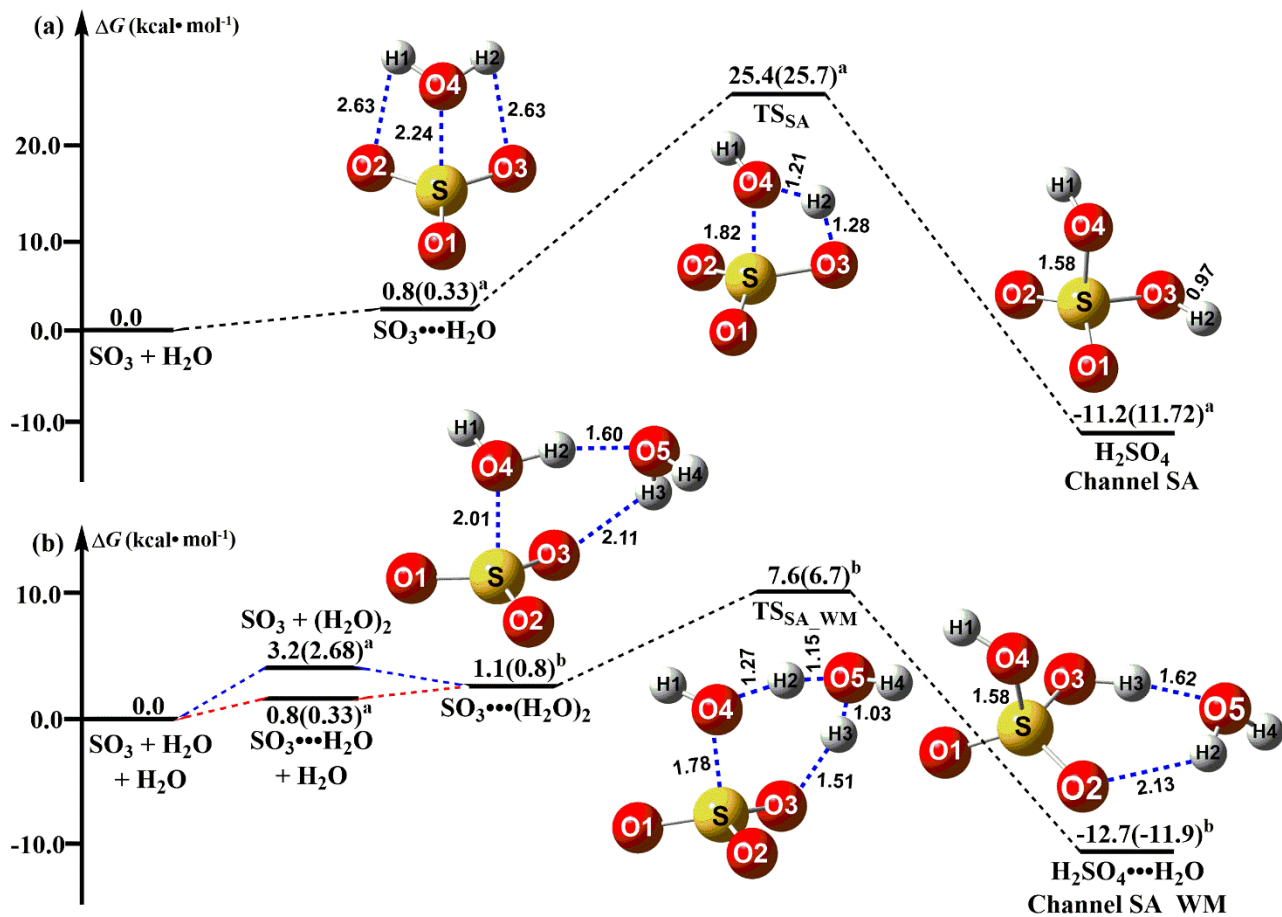

**Figure S1** Schematic energy diagrams for the formation of H<sub>2</sub>SO<sub>4</sub> from the SO<sub>3</sub> + H<sub>2</sub>O reaction without and with H<sub>2</sub>O at the CCSD(T)-F12/cc-pVDZ-F12//M06-2X/6-311++G(2df,2pd) level of theory

<sup>a</sup> The value was taken from reference (*Chem. Phys. Lett.*, 2013, 581, 26-29.)

<sup>b</sup> The value was taken from reference (*J. Phys. Chem. A*, 2021, 123, 3131–3141.)

**Table S1** Relative energies ( $\Delta E$  and  $\Delta(E + ZPE)$ /(kcal·mol<sup>-1</sup>)), enthalpies ( $\Delta H$ /(kcal·mol<sup>-1</sup>), entropy (S(298 K)/(cal·mol<sup>-1</sup>·K<sup>-1</sup>)) and free energies ( $\Delta G$ (298 K)/(kcal·mol<sup>-1</sup>)) for the reactants, intermediates, transition states and products involved in the reaction of SO<sub>3</sub> + H<sub>2</sub>SO<sub>4</sub> without and with H<sub>2</sub>O along with the hydrolysis reaction of SO<sub>3</sub> without and with H<sub>2</sub>O

| <i>Species</i>                                                       | ZPE  | $\Delta E$ | S     | $\Delta G$                                    | $\Delta(E+ZPE)$ | $\Delta H$ |
|----------------------------------------------------------------------|------|------------|-------|-----------------------------------------------|-----------------|------------|
| SO <sub>3</sub> + H <sub>2</sub> SO <sub>4</sub>                     | 33.1 | 0.0        | 133.5 | 0.0                                           | 0.0             | 0.0        |
| SO <sub>3</sub> ···H <sub>2</sub> SO <sub>4</sub>                    | 34.6 | -14.3      | 93.8  | -1.6                                          | -12.9           | -13.4      |
| TS <sub>DSA</sub>                                                    | 32.9 | -11.6      | 87.1  | 0.7                                           | -11.9           | -13.1      |
| H <sub>2</sub> S <sub>2</sub> O <sub>7</sub>                         | 35.4 | -21.6      | 89.5  | -7.0                                          | -19.4           | -20.2      |
| SO <sub>3</sub> + H <sub>2</sub> SO <sub>4</sub> + H <sub>2</sub> O  | 46.7 | 0.0        | 178.6 | 0.0                                           | 0.0             | 0.0        |
| SO <sub>3</sub> ···H <sub>2</sub> O + H <sub>2</sub> SO <sub>4</sub> | 24.0 | -9.4       | 77.9  | 0.8                                           | -7.0            | -7.6       |
| H <sub>2</sub> SO <sub>4</sub> ···H <sub>2</sub> O + SO <sub>3</sub> | 40.9 | -12.4      | 87.0  | -1.9(-1.82) <sup>a</sup>                      | -10.2           | -10.9      |
| IM <sub>DSA_WM'</sub>                                                | 49.3 | -18.0      | 119.4 | 2.1                                           | -15.4           | -15.6      |
| TS <sub>DSA_WM'</sub>                                                | 49.2 | -18.0      | 112.8 | 3.3                                           | -15.6           | -16.3      |
| IM <sub>DSA_WM</sub>                                                 | 49.8 | -27.8      | 104.5 | -4.0                                          | -24.7           | -26.1      |
| TS <sub>DSA_WM</sub>                                                 | 49.3 | -27.5      | 99.9  | -3.5                                          | -24.9           | -26.9      |
| H <sub>2</sub> S <sub>2</sub> O <sub>7</sub> ···H <sub>2</sub> O     | 50.7 | -34.6      | 102.8 | -9.5                                          | -30.6           | -32.1      |
| SO <sub>3</sub> + H <sub>2</sub> O + H <sub>2</sub> SO <sub>4</sub>  | 46.7 | 0.0        | 178.6 | 0.0                                           | 0.0             | 0.0        |
| SO <sub>3</sub> ···H <sub>2</sub> O + H <sub>2</sub> SO <sub>4</sub> | 24.0 | -9.4       | 77.9  | 0.8                                           | -7.0            | -7.6       |
| H <sub>2</sub> SO <sub>4</sub> ···H <sub>2</sub> O + SO <sub>3</sub> | 40.9 | -12.4      | 87.0  | -1.9(-1.82) <sup>a</sup>                      | -10.2           | -10.9      |
| IM <sub>SA_SA'</sub>                                                 | 49.5 | -18.5      | 118.6 | 3.6                                           | -15.5           | -15.9      |
| TS <sub>SA_SA'</sub>                                                 | 49.6 | -18.4      | 111.0 | 5.4                                           | -15.3           | -16.3      |
| IM <sub>SA_SA</sub>                                                  | 50.2 | -27.0      | 104.6 | -1.2                                          | -23.3           | -24.9      |
| TS <sub>SA_SA</sub>                                                  | 49.1 | -26.8      | 99.4  | -1.2                                          | -24.2           | -26.5      |
| H <sub>2</sub> SO <sub>4</sub> ···H <sub>2</sub> SO <sub>4</sub>     | 50.8 | -34.1      | 103.0 | -7.3                                          | -29.8           | -31.4      |
| SO <sub>3</sub> + H <sub>2</sub> O                                   | 21.6 | 0.0        | 106.2 | 0.0                                           | 0.0             | 0.0        |
| SO <sub>3</sub> ···H <sub>2</sub> O                                  | 24.0 | -9.4       | 77.9  | 0.8(0.33) <sup>b</sup><br>(0.62) <sup>c</sup> | -7.0            | -7.6       |
| TS <sub>SA</sub>                                                     | 22.3 | 15.7       | 70.4  | 25.4 (25.7) <sup>b</sup>                      | 16.4            | 14.7       |
| H <sub>2</sub> SO <sub>4</sub>                                       | 25.2 | -23.6      | 71.8  | -11.2(-10.72) <sup>b</sup>                    | -20.0           | -21.4      |
| SO <sub>3</sub> + H <sub>2</sub> O + H <sub>2</sub> O                | 35.2 | 0.0        | 151.3 | 0.0                                           | 0.0             | 0.0        |
| SO <sub>3</sub> ···H <sub>2</sub> O + H <sub>2</sub> O               | 24.0 | -9.4       | 77.9  | 0.8(0.33) <sup>b</sup><br>(0.62) <sup>c</sup> | -7.0            | -7.6       |
| SO <sub>3</sub> + (H <sub>2</sub> O) <sub>2</sub>                    | 29.5 | -5.0       | 68.6  | 3.2(2.68) <sup>b</sup>                        | -2.7            | -3.3       |
| SO <sub>3</sub> ···(H <sub>2</sub> O) <sub>2</sub>                   | 40.7 | -21.6      | 87.4  | 1.1(0.8) <sup>d</sup>                         | -16.0           | -17.9      |
| TS <sub>SA_WM</sub>                                                  | 39.1 | -14.5      | 80.1  | 7.6(6.7) <sup>d</sup>                         | -10.6           | -13.6      |
| H <sub>2</sub> SO <sub>4</sub> ···H <sub>2</sub> O                   | 41.0 | -36.0      | 85.5  | -12.7(-11.9) <sup>d</sup>                     | -30.2           | -32.3      |

<sup>a</sup> The value was taken from reference (Long, B., Tan, X. F., Chang, C. R., Zhao, W. X., Long, Z. W., Ren, D. S., and Zhang, W. J.: Theoretical studies on gas-phase reactions of sulfuric acid catalyzed hydrolysis of formaldehyde and formaldehyde with sulfuric acid and H<sub>2</sub>SO<sub>4</sub>···H<sub>2</sub>O complex, J. Phys. Chem. A 117, 5106-5116, 2013.)

<sup>b</sup> The value was taken from reference (Long, B., Chang, C. R., Long, Z. W., Wang, Y. B., Tan, X. F., and Zhang, W. J.: Nitric acid catalyzed hydrolysis of SO<sub>3</sub> in the formation of sulfuric acid: A theoretical study, Chem. Phys. Lett., 581, 26-29, 2013.)

<sup>c</sup> The value was taken from reference (Long, B., Long, Z. W., Wang, Y. B., Tan, X. F., Han, Y. W., Long, C. W., Qin, S. J., and Zhang, W. J.: Formic acid catalyzed gas-phase reaction of H<sub>2</sub>O with SO<sub>3</sub> and the reverse reaction: A theoretical study, ChemPhysChem, 13, 323-329, 10.1002/cphc.201100558, 2012.)



<sup>d</sup> The value was taken from reference (Sarkar, S., Oram, B. K., and Bandyopadhyay, B.: Influence of ammonia and water on the fate of sulfur trioxide in the troposphere: theoretical investigation of sulfamic acid and sulfuric acid formation pathways, J. Phys. Chem. A, 123, 3131-3141, 2019.)

**Table S2** Equilibrium constants ( $\text{cm}^3 \cdot \text{molecule}^{-1}$ ) for  $\text{SO}_3 \cdots \text{H}_2\text{SO}_4$ ,  $\text{SO}_3 \cdots \text{H}_2\text{O}$ ,  $\text{H}_2\text{SO}_4 \cdots \text{H}_2\text{O}$  and  $(\text{H}_2\text{O})_2$  within the temperature range of 280-320 K

| $T/\text{K}$ | $\text{SO}_3 \cdots \text{H}_2\text{SO}_4$ | $\text{SO}_3 \cdots \text{H}_2\text{O}$        | $\text{H}_2\text{SO}_4 \cdots \text{H}_2\text{O}$ | $(\text{H}_2\text{O})_2$                       |
|--------------|--------------------------------------------|------------------------------------------------|---------------------------------------------------|------------------------------------------------|
| 280          | $2.54 \times 10^{-18}$                     | $2.45 \times 10^{-20}$                         | $3.00 \times 10^{-118}$                           | $2.86 \times 10^{-22}$                         |
| 290          | $1.15 \times 10^{-18}$                     | $1.59 \times 10^{-20}$                         | $2.66 \times 10^{-19}$                            | $2.42 \times 10^{-22}$                         |
| 298          | $6.33 \times 10^{-19}$                     | $1.14 \times 10^{-20}(6.44 \times 10^{-20})^a$ | $1.67 \times 10^{-19}(5.16 \times 10^{-20})^b$    | $2.14 \times 10^{-22}(2.34 \times 10^{-21})^c$ |
| 300          | $5.48 \times 10^{-19}$                     | $1.06 \times 10^{-20}$                         | $1.49 \times 10^{-19}$                            | $2.08 \times 10^{-22}$                         |
| 310          | $2.75 \times 10^{-19}$                     | $7.25 \times 10^{-21}$                         | $8.68 \times 10^{-20}$                            | $1.80 \times 10^{-22}$                         |
| 320          | $1.44 \times 10^{-20}$                     | $5.10 \times 10^{-21}$                         | $5.24 \times 10^{-20}$                            | $1.58 \times 10^{-22}$                         |

<sup>a</sup> The value was taken from reference (Long, B., Long, Z. W., Wang, Y. B., Tan, X. F., Han, Y. W., Long, C. W., Qin, S. J., and Zhang, W. J.: Formic Acid Catalyzed Gas-Phase Reaction of  $\text{H}_2\text{O}$  with  $\text{SO}_3$  and the Reverse Reaction: A Theoretical Study, *ChemPhysChem*, 13, 323-329, 10.1002/cphc.201100558, 2012.)

<sup>b</sup> The value was taken from reference (Wang, R., Wen, M., Chen, X., Mu, R., Zeng, Z., Chai, G., Lily, M., Wang, Z., and Zhang, T.: Atmospheric Chemistry of  $\text{CH}_2\text{OO}$ : The Hydrolysis of  $\text{CH}_2\text{OO}$  in Small Clusters of Sulfuric Acid, *J. Phys. Chem. A*, 125, 2642-2652, 10.1021/acs.jpca.1c02006, 2021.)

<sup>c</sup> The value was taken from reference (Torrent-Sucarrat, M., Francisco, J. S., and Anglada, J. M.: Sulfuric acid as autocatalyst in the formation of sulfuric acid, *J. Am. Chem. Soc.*, 134, 20632-20644, 2012.)

**Table S3** Concentrations (molecules·cm<sup>-3</sup>) of H<sub>2</sub>O and H<sub>2</sub>SO<sub>4</sub> within the temperature range of 280-320 K

| Catalysts                                          | RH                                  | 280 K                 | 290 K                 | 298 K                  | 300 K                  | 310 K                 | 320 K                 |
|----------------------------------------------------|-------------------------------------|-----------------------|-----------------------|------------------------|------------------------|-----------------------|-----------------------|
| H <sub>2</sub> O                                   | 20%RH <sup>a</sup>                  | $5.16 \times 10^{16}$ | $9.60 \times 10^{16}$ | $1.50 \times 10^{17}$  | $1.72 \times 10^{17}$  | $2.92 \times 10^{17}$ | $4.70 \times 10^{17}$ |
|                                                    | 40%RH <sup>a</sup>                  | $1.03 \times 10^{17}$ | $1.91 \times 10^{17}$ | $3.10 \times 10^{17}$  | $3.43 \times 10^{17}$  | $5.84 \times 10^{17}$ | $9.40 \times 10^{17}$ |
|                                                    | 60%RH <sup>a</sup>                  | $1.55 \times 10^{17}$ | $2.87 \times 10^{17}$ | $4.50 \times 10^{17}$  | $5.15 \times 10^{17}$  | $8.77 \times 10^{17}$ | $1.41 \times 10^{18}$ |
|                                                    | 80%RH <sup>a</sup>                  | $2.07 \times 10^{17}$ | $3.82 \times 10^{17}$ | $6.20 \times 10^{17}$  | $6.86 \times 10^{17}$  | $1.17 \times 10^{18}$ | $1.88 \times 10^{18}$ |
|                                                    | 100%RH <sup>a</sup>                 | $2.58 \times 10^{17}$ | $4.78 \times 10^{17}$ | $7.70 \times 10^{17}$  | $8.58 \times 10^{17}$  | $1.46 \times 10^{18}$ | $2.35 \times 10^{18}$ |
| H <sub>2</sub> SO <sub>4</sub>                     | [SA] <sup>b</sup> = 10 <sup>6</sup> | $3.90 \times 10^6$    | $3.80 \times 10^6$    | $3.70 \times 10^6$     | $3.60 \times 10^6$     | $3.50 \times 10^6$    | $3.40 \times 10^6$    |
|                                                    | [SA] <sup>c</sup> = 10 <sup>7</sup> | $5.00 \times 10^7$    | $5.00 \times 10^7$    | $5.00 \times 10^7$     | $5.00 \times 10^7$     | $5.00 \times 10^7$    | $5.00 \times 10^7$    |
|                                                    | [SA] <sup>b</sup> = 10 <sup>8</sup> | $3.90 \times 10^8$    | $3.80 \times 10^8$    | $3.70 \times 10^8$     | $3.60 \times 10^8$     | $3.50 \times 10^8$    | $3.40 \times 10^8$    |
| H <sub>2</sub> SO <sub>4</sub> ···H <sub>2</sub> O | 20%RH                               | $6.03 \times 10^5$    | $5.76 \times 10^5$    | $5.42 \times 10^5$     | $5.39 \times 10^5$     | $5.10 \times 10^5$    | $5.10 \times 10^5$    |
|                                                    | 40%RH                               | $1.20 \times 10^6$    | $1.15 \times 10^6$    | $1.12 \times 10^6$     | $1.07 \times 10^6$     | $1.02 \times 10^6$    | $1.02 \times 10^6$    |
|                                                    | [SA] <sup>e</sup> = 10 <sup>6</sup> | 60%RH                 | $1.81 \times 10^6$    | $1.72 \times 10^6$     | $1.63 \times 10^6$     | $1.61 \times 10^6$    | $1.53 \times 10^6$    |
|                                                    | 80%RH                               | $2.42 \times 10^6$    | $2.29 \times 10^6$    | $2.24 \times 10^6$     | $2.15 \times 10^6$     | $2.04 \times 10^6$    | $2.04 \times 10^6$    |
|                                                    | 100%RH                              | $3.01 \times 10^6$    | $2.87 \times 10^6$    | $2.78 \times 10^6$     | $2.69 \times 10^6$     | $2.55 \times 10^6$    | $2.55 \times 10^6$    |
|                                                    | 20%RH                               | $7.73 \times 10^6$    | $7.58 \times 10^6$    | $7.33 \times 10^6$     | $7.48 \times 10^6$     | $7.29 \times 10^6$    | $7.29 \times 10^6$    |
|                                                    | 40%RH                               | $1.54 \times 10^7$    | $1.51 \times 10^7$    | $1.51 \times 10^7$     | $1.49 \times 10^7$     | $1.46 \times 10^7$    | $1.46 \times 10^7$    |
|                                                    | [SA] <sup>c</sup> = 10 <sup>7</sup> | 60%RH                 | $2.32 \times 10^7$    | $2.27 \times 10^7$     | $2.20 \times 10^7$     | $2.24 \times 10^7$    | $2.19 \times 10^7$    |
|                                                    | 80%RH                               | $3.10 \times 10^7$    | $3.02 \times 10^7$    | $3.03 \times 10^7$     | $2.98 \times 10^7$     | $2.92 \times 10^7$    | $2.92 \times 10^7$    |
|                                                    | 100%RH                              | $3.86 \times 10^7$    | $3.77 \times 10^7$    | $3.76 \times 10^7$     | $3.73 \times 10^7$     | $3.64 \times 10^7$    | $3.64 \times 10^7$    |
| [SA] <sup>e</sup> = 10 <sup>8</sup>                | 20%RH                               | $6.03 \times 10^7$    | $5.76 \times 10^7$    | $5.42 \times 10^7$     | $5.39 \times 10^7$     | $5.10 \times 10^7$    | $5.10 \times 10^7$    |
|                                                    | 40%RH                               | $1.20 \times 10^8$    | $1.15 \times 10^8$    | $1.12 \times 10^8$     | $1.07 \times 10^8$     | $1.02 \times 10^8$    | $1.02 \times 10^8$    |
|                                                    | 60%RH                               | $1.81 \times 10^8$    | $1.72 \times 10^8$    | $1.63 \times 10^8$     | $1.61 \times 10^8$     | $1.53 \times 10^8$    | $1.53 \times 10^8$    |
|                                                    | 80%RH                               | $2.42 \times 10^8$    | $2.29 \times 10^8$    | $2.24 \times 10^8$     | $2.15 \times 10^8$     | $2.04 \times 10^8$    | $2.04 \times 10^8$    |
|                                                    | 100%RH                              | $3.01 \times 10^8$    | $2.87 \times 10^8$    | $2.78 \times 10^8$     | $2.69 \times 10^8$     | $2.55 \times 10^8$    | $2.55 \times 10^8$    |
|                                                    |                                     |                       |                       | $(2.40 \times 10^7)^c$ | $(1.11 \times 10^8)^d$ |                       |                       |

<sup>a</sup> The values were reported from reference (Anglada, J. M., Hoffman, G. J., Slipchenko, L. V., M. Costa, M., Ruiz-Lopez, M. F., and Francisco, J. S.: Atmospheric significance of water clusters and ozone-water complexes, *J. Phys. Chem. A*, 117, 10381-10396, 2013.)

<sup>b</sup> The values were taken from reference (Liu, J., Fang, S., Wang, Z., Yi, W., Tao, F. M., and Liu, J. Y.: Hydrolysis of sulfur dioxide in small clusters of sulfuric acid: Mechanistic and kinetic study, *Environ. Sci. Technol.*, 49, 13112-13120, 2015.)

<sup>c</sup> The values were taken from reference (Liu, L., Zhong, J., Vehkamäki, H., Kurtén, T., Du, L., Zhang, X., Francisco, J. S., and Zeng, X. C.: Unexpected quenching effect on new particle formation from the atmospheric reaction of methanol with SO<sub>3</sub>, *Proc. Natl. Acad. Sci. U.S.A.*, 116, 24966-24971, 2019.)

<sup>d</sup> The values were taken from reference (Wang, R., Wen, M., Chen, X., Mu, R., Zeng, Z., Chai, G., Lily, M., Wang, Z., and Zhang, T.: Atmospheric Chemistry of CH<sub>2</sub>OO: The Hydrolysis of CH<sub>2</sub>OO in Small Clusters of Sulfuric Acid, *J. Phys. Chem. A*, 125, 2642-2652, 10.1021/acs.jpca.1c02006, 2021.)

### Part 1 The calculation details of high-pressure-limit (HPL) rate constants

The VRC-VTST calculations were carried out with the potential surface obtained by using CCSD(T)-F12/cc-pVDZ-F12//M06-2X/6-311++G(2df,2pd) and were performed by variationally minimizing the rate constant with respect to the distance  $s$  between pivot points and with respect to the location of the pivot points. Specifically, using two pivot points produces a single-faceted dividing surface for the  $\text{SO}_3 + \text{H}_2\text{SO}_4$  reaction without and with  $\text{H}_2\text{O}$ . Such as, using two pivot points produces a single-faceted dividing surface for the reaction of  $\text{SO}_3 + \text{H}_2\text{SO}_4$ . One pivot point is located at a distance  $d$  from the center of mass (COM) of  $\text{SO}_3$ , where the vector connecting the pivot point with  $\text{SO}_3$ 's COM is perpendicular to the  $\text{SO}_3$  plane, and the other pivot point is located at a distance  $d$  from the COM of catalyst  $\text{H}_2\text{SO}_4$ , where the vector connecting the pivot point with catalyst  $\text{H}_2\text{SO}_4$ 's COM is perpendicular to catalyst  $\text{H}_2\text{SO}_4$  plane. The lengths of these vectors are fixed successively at 0.2 Å. The reaction coordinate  $s$  is the distance between a pivot point on one reactant and a pivot point on the other reactant. The distance  $s$  between pivot points is varied from 2.5 to 8.0 Å for  $\text{SO}_3 + \text{H}_2\text{SO}_4$  in each case with a 0.2 Å grid increment. The details of the VRC-VTST calculations can be seen in the supporting information of reference (Bao et al., 2016).

### Reference

Bao, J. L.; Zhang, X.; Truhlar, D. G.: Barrierless association of  $\text{CF}_2$  and dissociation of  $\text{C}_2\text{F}_4$  by variational transition-state theory and system-specific quantum Rice-Ramsperger-Kassel theory, Proc. Natl. Acad. Sci. U. S. A., 113, 13606-13611, 2016

**Table S4** The high-pressure limiting rate constants ( $\text{cm}^3 \cdot \text{molecule}^{-1} \cdot \text{s}^{-1}$ ) for the reactants to pre-reactive complex process in the  $\text{SO}_3 + \text{H}_2\text{SO}_4$  reaction without and with  $\text{H}_2\text{O}$ , and the hydrolysis of  $\text{SO}_3$  without and with  $\text{H}_2\text{O}$  calculated by the master equation within the temperature range of 280-320 K

| $T(\text{K})$ | $\text{SO}_3 + \text{H}_2\text{SO}_4 \rightarrow \text{SO}_3 \cdots \text{H}_2\text{SO}_4$ | $\text{SO}_3 + \text{H}_2\text{SO}_4 \cdots \text{H}_2\text{O} \rightarrow \text{IM}_{\text{DSA\_WM\_a}}'$         | $\text{SO}_3 \cdots \text{H}_2\text{O} + \text{H}_2\text{SO}_4 \rightarrow \text{SO}_3 \cdots \text{H}_2\text{SO}_4 \cdots \text{H}_2\text{O}$ |
|---------------|--------------------------------------------------------------------------------------------|--------------------------------------------------------------------------------------------------------------------|------------------------------------------------------------------------------------------------------------------------------------------------|
| 280           | $9.75 \times 10^{-11}$                                                                     | $1.69 \times 10^{-10}$                                                                                             | $7.23 \times 10^{-11}$                                                                                                                         |
| 290           | $9.93 \times 10^{-11}$                                                                     | $1.72 \times 10^{-10}$                                                                                             | $7.35 \times 10^{-11}$                                                                                                                         |
| 298           | $1.01 \times 10^{-10}$                                                                     | $1.75 \times 10^{-10}$                                                                                             | $7.46 \times 10^{-11}$                                                                                                                         |
| 300           | $1.01 \times 10^{-10}$                                                                     | $1.75 \times 10^{-10}$                                                                                             | $7.48 \times 10^{-11}$                                                                                                                         |
| 310           | $1.03 \times 10^{-10}$                                                                     | $1.78 \times 10^{-10}$                                                                                             | $7.60 \times 10^{-11}$                                                                                                                         |
| 320           | $1.04 \times 10^{-10}$                                                                     | $1.81 \times 10^{-10}$                                                                                             | $7.73 \times 10^{-11}$                                                                                                                         |
| $T(\text{K})$ | $\text{SO}_3 + \text{H}_2\text{O} \rightarrow \text{SO}_3 \cdots \text{H}_2\text{O}$       | $\text{SO}_3 \cdots \text{H}_2\text{O} + \text{H}_2\text{O} \rightarrow \text{SO}_3 \cdots (\text{H}_2\text{O})_2$ |                                                                                                                                                |
| 280           | $1.45 \times 10^{-10}$                                                                     | $2.24 \times 10^{-10}$                                                                                             |                                                                                                                                                |
| 290           | $1.47 \times 10^{-10}$                                                                     | $2.28 \times 10^{-10}$                                                                                             |                                                                                                                                                |
| 298           | $1.49 \times 10^{-10}$                                                                     | $2.32 \times 10^{-10}$                                                                                             |                                                                                                                                                |
| 300           | $1.50 \times 10^{-10}$                                                                     | $2.32 \times 10^{-10}$                                                                                             |                                                                                                                                                |
| 310           | $1.52 \times 10^{-10}$                                                                     | $2.36 \times 10^{-10}$                                                                                             |                                                                                                                                                |
| 320           | $1.55 \times 10^{-10}$                                                                     | $2.40 \times 10^{-10}$                                                                                             |                                                                                                                                                |

## Part 2 The details of Master Equation Solver for Multi-Energy Well Reactions

The rate constants for the  $\text{SO}_3 + \text{H}_2\text{SO}_4$  reaction without and with  $\text{H}_2\text{O}$  within the temperature range of 280-320 K were calculated by using the Master Equation Solver for Multi-Energy Well Reactions (MESMER) (Miller and Klippenstein, 2006). Specifically, as for the  $\text{SO}_3 + \text{H}_2\text{SO}_4$  reaction without and with  $\text{H}_2\text{O}$ , the barrierless bimolecular reaction steps were evaluated by using Inverse Laplace Transform (ILT) method (Horváth et al., 2020), whereas the rate determining steps were obtained by employing the RRKM theory. The ILT methods and RRKM theory can be respectively expressed in Eq. (S1)-Eq. (S2).

$$k(E) = \frac{W(E - E_0)}{h\rho(E)} \quad (\text{S1})$$

$$k^\infty(\beta) = \frac{1}{Q(\beta)} \int_0^\infty k(E)\rho(E)\exp(-\beta E)dE \quad (\text{S2})$$

In Eq. (S1) and Eq. (S2),  $W(E-E_0)$  is the rovibrational sum of states (SOS) at the optimized transition state (TS) geometry,  $E_0$  is the reaction threshold energy,  $h$  is Planck's constant,  $\rho(E)$  is the density of rovibrational states of the reactant, and  $Q(\beta)$  is the corresponding canonical partition function. Moreover, the electronic geometries, vibrational frequencies, and rotational constants were calculated at the M06-2X/6-311+G(2df,2pd) level; single-point energy calculations were refined at the CCSD(T)-F12/cc-pVDZ-F12 level for the modeling. The one-dimensional asymmetric Eckart potential was used to treat the tunneling effect in the RRKM calculation. In addition, the Lennard-Jones (L-J) parameters  $\varepsilon/k_B = 71.4$  K and  $\sigma = 3.798$  Å were used for  $\text{N}_2$ , while  $\varepsilon/k_B = 420.08$  K and  $\sigma = 2.89$  Å were estimated for  $\text{H}_2\text{SO}_4$  and its isomer.

## Reference

- Horváth, G., Horváth, I., Almousa, S. A. D., and Telek, M.: Numerical inverse Laplace transformation using concentrated matrix exponential distributions, *Perform. Evaluation*, 137, 102067, 2020.
- Miller, J. A., and Klippenstein, S. J.: Master equation methods in gas phase chemical kinetics, *J. Phys. Chem. A*, 110, 10528-10544, 2006.

**Table S5** Rate constants ( $\text{cm}^3\cdot\text{molecule}^{-1}\cdot\text{s}^{-1}$ ) for the  $\text{SO}_3 + \text{H}_2\text{SO}_4$  reaction with  $\text{H}_2\text{O}$  and the hydrolysis of  $\text{SO}_3$  without and with  $\text{H}_2\text{O}$  within the temperature range of 280-320 K

| Channel           | T/K                    | 280                                                              | 290                                                              | 298                                                               | 300                                                              | 310                                                              | 320                                                              |
|-------------------|------------------------|------------------------------------------------------------------|------------------------------------------------------------------|-------------------------------------------------------------------|------------------------------------------------------------------|------------------------------------------------------------------|------------------------------------------------------------------|
| Channel<br>DSA_WM | $k_{\text{DSA\_WM}_o}$ | $3.35 \times 10^{-11}$                                           | $3.53 \times 10^{-11}$                                           | $3.27 \times 10^{-11}$                                            | $3.19 \times 10^{-11}$                                           | $2.73 \times 10^{-11}$                                           | $2.29 \times 10^{-11}$                                           |
|                   | $k_{\text{DSA\_WM}_s}$ | $1.33 \times 10^{-11}$                                           | $1.13 \times 10^{-11}$                                           | $9.87 \times 10^{-12}$                                            | $9.53 \times 10^{-12}$                                           | $7.95 \times 10^{-12}$                                           | $6.59 \times 10^{-12}$                                           |
| Channel<br>SA_SA  | $k_{\text{SA\_SA}_o}$  | 1.39E-10                                                         | 1.48E-10                                                         | 1.45E-10                                                          | 1.44E-10                                                         | 1.39E-10                                                         | 1.33E-10                                                         |
|                   | $k_{\text{SA\_SA}_s}$  | 2.03E-11                                                         | 1.80E-11                                                         | 1.64E-11                                                          | 1.61E-11                                                         | 1.45E-11                                                         | 1.31E-11                                                         |
| Channel SA        | $k_{\text{SA}}$        | $6.22 \times 10^{-24}$<br>( $8.0 \times 10^{-24}$ ) <sup>a</sup> | $8.07 \times 10^{-24}$<br>( $1.1 \times 10^{-23}$ ) <sup>a</sup> | $1.02 \times 10^{-23}$<br>( $1.4 \times 10^{-23}$ ) <sup>a</sup>  | $1.08 \times 10^{-23}$<br>( $1.4 \times 10^{-23}$ ) <sup>a</sup> | $1.49 \times 10^{-23}$<br>( $2.0 \times 10^{-23}$ ) <sup>a</sup> | $2.11 \times 10^{-23}$<br>( $3.0 \times 10^{-23}$ ) <sup>a</sup> |
| Channel<br>SA_WM  | $k_{\text{SA\_WM}}$    | $1.37 \times 10^{-12}$                                           | $1.17 \times 10^{-12}$                                           | $1.04 \times 10^{-12}$<br>( $4.08 \times 10^{-12}$ ) <sup>a</sup> | $1.01 \times 10^{-12}$                                           | $8.67 \times 10^{-13}$                                           | $7.49 \times 10^{-13}$                                           |

$k_{\text{DSA\_WM}_o}$  and  $k_{\text{DSA\_WM}_s}$  are respectively the rate constants for the formation of  $\text{H}_2\text{S}_2\text{O}_7$  from the reaction of  $\text{SO}_3 + \text{H}_2\text{SO}_4$  with  $\text{H}_2\text{O}$  occurring through one-step and stepwise routes;  $k_{\text{SA}}$  and  $k_{\text{SA\_WM}}$  are respectively the rate constants for the formation of  $\text{H}_2\text{SO}_4$  without and with  $\text{H}_2\text{O}$ .

<sup>a</sup> The value was taken from reference (Bandyopadhyay, B., Kumar, P., and Biswas, P.: Ammonia Catalyzed Formation of Sulfuric Acid in Troposphere: The Curious Case of a Base Promoting Acid Rain, J. Phys. Chem. A, 121, 3101-3108, 10.1021/acs.jpca.7b01172, 2017.)

<sup>b</sup> The value was taken from reference (Torrent-Sucarrat, M., Francisco, J. S., and Anglada, J. M.: Sulfuric acid as autocatalyst in the formation of sulfuric acid, J. Am. Chem. Soc., 134, 20632-20644, 2012.)

1 **Table S6** The rate constant ( $\text{cm}^3 \cdot \text{molecule}^{-1} \cdot \text{s}^{-1}$ ) for the  $\text{SO}_3 + \text{H}_2\text{SO}_4$  reaction for the  $\text{SO}_3 + \text{H}_2\text{SO}_4$  reaction  
 2 without and with  $\text{H}_2\text{O}$  within the temperature range of 280-320 K by using transition state theory

| $T/(\text{K})$           | 280 K                 | 290 K                 | 298 K                 | 300 K                 | 310 K                 | 320 K                  |
|--------------------------|-----------------------|-----------------------|-----------------------|-----------------------|-----------------------|------------------------|
| $k_{\text{DSA}}$         | $8.98 \times 10^{-9}$ | $4.38 \times 10^{-9}$ | $2.56 \times 10^{-9}$ | $2.25 \times 10^{-9}$ | $1.20 \times 10^{-9}$ | $6.72 \times 10^{-10}$ |
| $k'_{\text{DSA\_WM\_o}}$ | $5.77 \times 10^{-8}$ | $2.59 \times 10^{-8}$ | $1.42 \times 10^{-8}$ | $1.23 \times 10^{-8}$ | $6.12 \times 10^{-9}$ | $3.18 \times 10^{-9}$  |
| $k'_{\text{DSA\_WM\_s}}$ | $5.20 \times 10^{-5}$ | $2.44 \times 10^{-5}$ | $1.39 \times 10^{-5}$ | $1.21 \times 10^{-5}$ | $6.29 \times 10^{-6}$ | $3.42 \times 10^{-6}$  |

3  $k_{\text{DSA}}$  is the rate constant for the  $\text{SO}_3 + \text{H}_2\text{SO}_4$  reaction;  $k_{\text{DSA\_WM\_o}}$  and  $k_{\text{DSA\_WM\_s}}$  are respectively the rate constants for  $\text{H}_2\text{O}$ -assisted  
 4  $\text{SO}_3 + \text{H}_2\text{SO}_4$  reaction occurring through one-step and stepwise routes.

5  
 6 As seen in Table S6, the rate constants for the  $\text{SO}_3 + \text{H}_2\text{SO}_4$  reaction without and with  $\text{H}_2\text{O}$  by using  
 7 transition state theory is significantly higher than the gas kinetic limit. In addition, as for the rate constants  
 8 calculated by transition state theory (TST) coupled with the pre-equilibrium approximation, the rate constants  
 9 for the  $\text{SO}_3 + \text{H}_2\text{SO}_4$  reaction without and with  $\text{H}_2\text{O}$  showed appreciably high negative temperature dependence  
 10 making the rate constants even larger at lower temperatures. This reveals that the TST coupled with pre-  
 11 equilibrium approximation used in our calculation is truly obsolete and may not be appropriate. Thus, Using the  
 12 Master Equation/Rice-Ramsperger-Kassel-Marcus (ME/RRKM) models, the kinetic calculations for the  $\text{SO}_3 +$   
 13  $\text{H}_2\text{SO}_4$  reaction without and with  $\text{H}_2\text{O}$  were performed by Bartis-Widom method in the MESMER program  
 14 package (Master Equation Solver for Multi-Energy Well Reactions).



### 1 **Part 3 Calculations of effective rate constants**

2 Usually, the effective rate constants ( $k'$ ) is considered to be the relative efficiency of many atmospheric  
3 reactions (Liu et al., 2019; Sun et al., 2016; Ali et al., 2018; Ali et al., 2019) with water vapor. To better  
4 understand the competition between  $\text{H}_2\text{S}_2\text{O}_7$  and  $\text{H}_2\text{SO}_4$  formation in the atmospheric environment, it is  
5 necessary to compare the effective rate constants in different reaction. For the  $\text{H}_2\text{S}_2\text{O}_7$  formation, the  $k'$  for the  
6  $\text{H}_2\text{O}$ -assisted reaction (Channels DSA\_WM) can be respectively expressed as:

$$7 \quad k'_{\text{DSA\_WM}_o} = k_{\text{DSA\_WM}_o} \times K_{\text{eq1}} \times [\text{H}_2\text{O}] \quad (\text{S3})$$

$$8 \quad k'_{\text{DSA\_WM}_s} = k_{\text{DSA\_WM}_s} \times K_{\text{eq2}} \times [\text{H}_2\text{O}] \quad (\text{S4})$$

9 In above formula,  $k_{\text{DSA\_WM}_o}$  and  $k_{\text{DSA\_WM}_s}$  were respectively denoted the bimolecular rate coefficient for  
10 Channels DSA\_WM\_o, DSA\_WM\_s and SA\_WM;  $[\text{H}_2\text{O}]$  and  $[\text{H}_2\text{SO}_4]$  were respectively represented the  
11 concentration of  $\text{H}_2\text{O}$  and  $\text{H}_2\text{SO}_4$  listed in Table S3;  $K_{\text{eq1}}$  and  $K_{\text{eq2}}$  is the equilibrium constant for the formation  
12 of complex  $\text{SO}_3 \cdots \text{H}_2\text{O}$  and  $\text{H}_2\text{SO}_4 \cdots \text{H}_2\text{O}$  shown in Table S2.

13

### 14 **Reference**

- 15 Ali, M. A., Balaganesh, M., and Lin, K.: Catalytic effect of a single water molecule on the  $\text{OH} + \text{CH}_2\text{NH}$  reaction, *Phys. Chem.*  
16 *Chem. Phys.*, 20, 4297-4307, 2018.
- 17 Ali, M. A., M, B., and Jang, S.: Can a single water molecule catalyze the  $\text{OH} + \text{CH}_2\text{CH}_2$  and  $\text{OH} + \text{CH}_2\text{O}$  reactions? *Atmos.*  
18 *Environ.*, 207, 82-92, <https://doi.org/10.1016/j.atmosenv.2019.03.025>, 2019.
- 19 Liu, L., Zhong, J., Vehkamäki, H., Kurtén, T., Du, L., Zhang, X., Francisco, J. S., and Zeng, X. C.: Unexpected quenching effect  
20 on new particle formation from the atmospheric reaction of methanol with  $\text{SO}_3$ , *Proc. Natl. Acad. Sci. U.S.A.*, 116, 24966-  
21 24971, 2019.
- 22 Sun, Y. Q., Wang, X., Bai, F.-Y., and Pan, X. M.: Theoretical study of the hydrolysis of  $\text{HOSO} + \text{NO}_2$  as a source of atmospheric  
23 HONO: effects of  $\text{H}_2\text{O}$  or  $\text{NH}_3$ , *Environ. Chem.*, 14, 19-30, 2016.

24

1 **Table S7** The rate ratio between the  $\text{SO}_3 + \text{H}_2\text{SO}_4$  reaction and the hydrolysis of  $\text{SO}_3$  within the temperature  
 2 range of 280-320 K at 0 km altitude

| RH     | $[\text{H}_2\text{SO}_4]$ | 280                   | 290                   | 298                   | 300                   | 310                   | 320                   |
|--------|---------------------------|-----------------------|-----------------------|-----------------------|-----------------------|-----------------------|-----------------------|
| 20%RH  | $10^6$                    | $3.30 \times 10^{-7}$ | $1.40 \times 10^{-8}$ | $7.48 \times 10^{-8}$ | $5.98 \times 10^{-8}$ | $2.80 \times 10^{-8}$ | $1.41 \times 10^{-9}$ |
|        | $10^7$                    | $4.23 \times 10^{-6}$ | $1.84 \times 10^{-6}$ | $1.01 \times 10^{-6}$ | $8.30 \times 10^{-7}$ | $4.00 \times 10^{-7}$ | $2.07 \times 10^{-7}$ |
|        | $10^8$                    | $3.30 \times 10^{-5}$ | $1.40 \times 10^{-5}$ | $7.48 \times 10^{-6}$ | $5.98 \times 10^{-6}$ | $2.80 \times 10^{-6}$ | $1.41 \times 10^{-7}$ |
| 40%RH  | $10^6$                    | $1.05 \times 10^{-7}$ | $4.48 \times 10^{-8}$ | $2.25 \times 10^{-8}$ | $1.91 \times 10^{-8}$ | $8.90 \times 10^{-9}$ | $4.45 \times 10^{-9}$ |
|        | $10^7$                    | $1.35 \times 10^{-6}$ | $5.90 \times 10^{-7}$ | $3.04 \times 10^{-7}$ | $2.65 \times 10^{-7}$ | $1.27 \times 10^{-7}$ | $6.54 \times 10^{-8}$ |
|        | $10^8$                    | $1.05 \times 10^{-5}$ | $4.48 \times 10^{-6}$ | $2.25 \times 10^{-6}$ | $1.91 \times 10^{-6}$ | $8.90 \times 10^{-7}$ | $4.45 \times 10^{-7}$ |
| 60%RH  | $10^6$                    | $5.65 \times 10^{-8}$ | $2.41 \times 10^{-8}$ | $1.28 \times 10^{-8}$ | $1.03 \times 10^{-8}$ | $4.79 \times 10^{-9}$ | $2.39 \times 10^{-9}$ |
|        | $10^7$                    | $7.24 \times 10^{-7}$ | $3.17 \times 10^{-7}$ | $1.72 \times 10^{-7}$ | $1.43 \times 10^{-7}$ | $6.84 \times 10^{-8}$ | $3.51 \times 10^{-8}$ |
|        | $10^8$                    | $5.65 \times 10^{-6}$ | $2.41 \times 10^{-6}$ | $1.28 \times 10^{-6}$ | $1.03 \times 10^{-6}$ | $4.79 \times 10^{-7}$ | $2.39 \times 10^{-7}$ |
| 80%RH  | $10^6$                    | $3.73 \times 10^{-8}$ | $1.60 \times 10^{-8}$ | $8.05 \times 10^{-9}$ | $6.82 \times 10^{-9}$ | $3.16 \times 10^{-9}$ | $1.57 \times 10^{-9}$ |
|        | $10^7$                    | $4.78 \times 10^{-7}$ | $2.10 \times 10^{-7}$ | $1.09 \times 10^{-7}$ | $9.47 \times 10^{-8}$ | $4.52 \times 10^{-8}$ | $2.32 \times 10^{-8}$ |
|        | $10^8$                    | $3.73 \times 10^{-6}$ | $1.60 \times 10^{-6}$ | $8.05 \times 10^{-7}$ | $6.82 \times 10^{-7}$ | $3.16 \times 10^{-7}$ | $1.57 \times 10^{-7}$ |
| 100%RH | $10^6$                    | $2.75 \times 10^{-8}$ | $1.17 \times 10^{-8}$ | $5.98 \times 10^{-9}$ | $5.01 \times 10^{-9}$ | $2.33 \times 10^{-9}$ | $1.16 \times 10^{-9}$ |
|        | $10^7$                    | $3.53 \times 10^{-7}$ | $1.55 \times 10^{-7}$ | $8.08 \times 10^{-8}$ | $6.96 \times 10^{-8}$ | $3.33 \times 10^{-8}$ | $1.70 \times 10^{-8}$ |
|        | $10^8$                    | $2.75 \times 10^{-6}$ | $1.17 \times 10^{-6}$ | $5.98 \times 10^{-7}$ | $5.01 \times 10^{-7}$ | $2.33 \times 10^{-7}$ | $1.16 \times 10^{-7}$ |

3

1 **Table S8** The rate ratio between the  $\text{SO}_3 + \text{H}_2\text{SO}_4$  reaction and the hydrolysis of  $\text{SO}_3$  within the altitude range  
 2 of 5-30 km in the atmospheres of Earth

| H (km) | T(K)   | P (Torr) | $[\text{H}_2\text{O}]^a$ | $[\text{H}_2\text{SO}_4]^b$                              | $k_{\text{DSA}}$       | $k_{\text{DSA\_WM\_s}}$ | $k_{\text{SA\_WM}}$    | $v_{\text{DSA}}/v_{\text{SA}}$                     |
|--------|--------|----------|--------------------------|----------------------------------------------------------|------------------------|-------------------------|------------------------|----------------------------------------------------|
| 5      | 259.30 | 406.75   | $2.43 \times 10^{16}$    | $6.00 \times 10^7$                                       | $3.16 \times 10^{-12}$ | $2.37 \times 10^{-11}$  | $1.91 \times 10^{-12}$ | $3.55 \times 10^{-6}$                              |
| 10     | 229.70 | 202.16   | $4.92 \times 10^{15}$    | $8.30 \times 10^6$<br>( $5.1 \times 10^9$ ) <sup>c</sup> | $1.58 \times 10^{-12}$ | $2.25 \times 10^{-11}$  | $2.60 \times 10^{-12}$ | $6.56 \times 10^{-5}$<br>( $9.57 \times 10^{-4}$ ) |
| 15     | 212.60 | 91.20    | $1.96 \times 10^{13}$    | $2.40 \times 10^5$                                       | $1.10 \times 10^{-13}$ | $1.10 \times 10^{-11}$  | $3.07 \times 10^{-12}$ | $2.22 \times 10^{-5}$                              |
| 20     | 215.50 | 41.04    | $9.56 \times 10^{12}$    | $4.20 \times 10^4$                                       | $1.50 \times 10^{-13}$ | $1.30 \times 10^{-11}$  | $2.89 \times 10^{-12}$ | $2.51 \times 10^{-5}$                              |
| 25     | 218.60 | 19.00    | $2.50 \times 10^{12}$    | $4.59 \times 10^5$                                       | $1.56 \times 10^{-13}$ | $1.11 \times 10^{-11}$  | $2.75 \times 10^{-12}$ | $1.20 \times 10^{-3}$                              |
| 30     | 223.70 | 8.36     | $2.62 \times 10^{12}$    | $2.88 \times 10^6$                                       | $1.49 \times 10^{-13}$ | $7.52 \times 10^{-11}$  | $2.55 \times 10^{-12}$ | $4.33 \times 10^{-2}$                              |

3  $k_{\text{DSA}}$ ,  $k_{\text{DSA\_WM\_s}}$  and  $k_{\text{SA\_WM}}$  are respectively denoted the bimolecular rate coefficient for the  $\text{H}_2\text{SO}_4 + \text{SO}_3$ ,  $\text{H}_2\text{SO}_4 \cdots \text{H}_2\text{O} + \text{SO}_3$  and  
 4  $\text{SO}_3 \cdots \text{H}_2\text{O} + \text{H}_2\text{O}$  reactions.  $v_{\text{DSA}}/v_{\text{SA}}$  is the rate ratio between the  $\text{SO}_3 + \text{SA}$  reaction and  $\text{H}_2\text{O}$ -assisted hydrolysis of  $\text{SO}_3$ .

5 <sup>a</sup> The value was taken from reference (*J. Phys. Chem. A*, 2013, 117, 10381-10396.)

6 <sup>b</sup> The value was taken from reference (*J. Atmos. Sci.*, 1979, 36, 699-717.)

7 <sup>c</sup> The value was is the concentration of  $\text{H}_2\text{SO}_4$  at the end and outside the aircraft engine and flight taken from reference (Geophys.  
 8 Res. Lett., 2002, 29, 17-11-17-14.)

#### 1 **Part 4 The details of the equilibrium process for the droplet system with 191 water molecules**

2 The droplet system with 191 water molecules has been equilibrated before SO<sub>3</sub> and H<sub>2</sub>SO<sub>4</sub> was added at  
3 the water surface. Specifically, a nearly spherical droplet with 191 water molecules was firstly constructed by  
4 using the Packmol program (*J. Comput. Chem.*, 2009, 30, 2157-2164.) with a tolerance of 2.0 Å, namely, all  
5 atoms from different molecules will be at least 2.0 Å apart. Then, based on the resulting initial structure, the  
6 GROMACS software (*J. Comput. Chem.*, 2005, 26, 1701-1718.) with the general AMBER force field (GAFF)  
7 (*J. Comput. Chem.* 2004, 25, 1157-1174.) was used to simulate the droplet equilibrium process with two steps.  
8 In the first step, a water slab of 35 × 35 × 35 Å<sup>3</sup> containing 191 water molecules was built using periodic  
9 boundary conditions to avoid the effect of neighboring replicas. In the second step, the water slab was fully  
10 equilibrated for 1 ns under NVT ensemble (N, V and T represent the number of atoms, volume and temperature,  
11 respectively) to reach equilibrium state. The water molecules were described by the TIP3P model. The  
12 isothermal-isochoric (NVT) simulation was executed at 298 K for simulation system. The temperature was kept  
13 constant by the V-rescale thermostat coupling algorithm. The coupling time constant is 0.1 ps. Bond lengths  
14 were constrained by the LINCS algorithm. The cut-off distance of 1.2 nm was set for van der Waals (vdW)  
15 interactions. The Particle Mesh Ewald (PME) summation method was used to calculate the electrostatic  
16 interactions. During the whole simulation process, a time step of 2 fs was set and three-dimensional periodic  
17 boundary conditions were adopted. Next, to ensure the stability of the system, the droplets were pre-optimized  
18 using BOMD at 300 K for 10 ps prior to the simulation of the air-water interfacial reaction. Using the density  
19 functional theory (DFT) method, the electronic exchange-correlation term was described by the Becke-Lee-  
20 Yang-Parr (BLYP) functional. The Grimme's dispersion correction (D3) was applied to account for the weak  
21 dispersion interaction. The double- $\zeta$  Gaussian (DZVP-MOLOPT) basis set and the Goedecker-Teter-Hutter  
22 (GTH) norm-conserving pseudopotentials were adopted to treat the valence and the core electrons, respectively.  
23 The planewave cutoff energy is set to 280 Ry, and that for the Gaussian basis set is 40 Ry. And the SCF  
24 convergence criterion is 1.0E-5 Hartree. All simulations were performed in NVT ensemble with Nose-Hoover  
25 thermostat controlling the temperature. Finally, the SO<sub>3</sub> and H<sub>2</sub>SO<sub>4</sub> molecule was added at the water surface  
26 after the droplet system with 191 water molecules was fully equilibrated.

27  
28

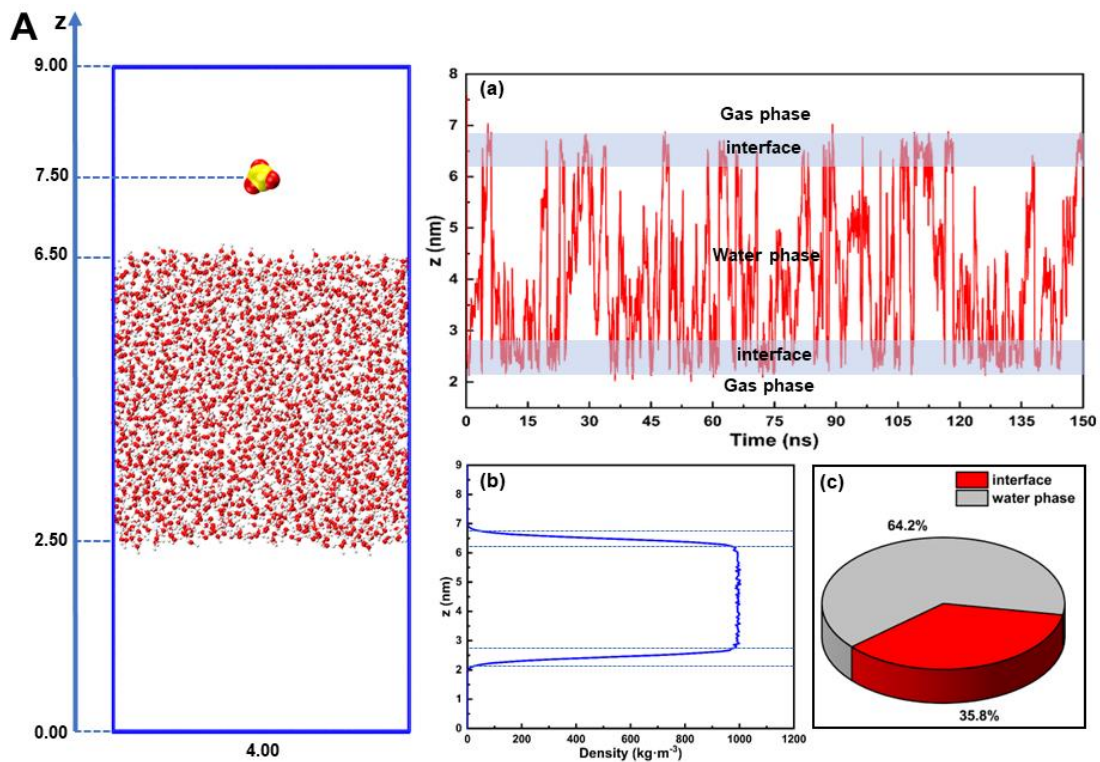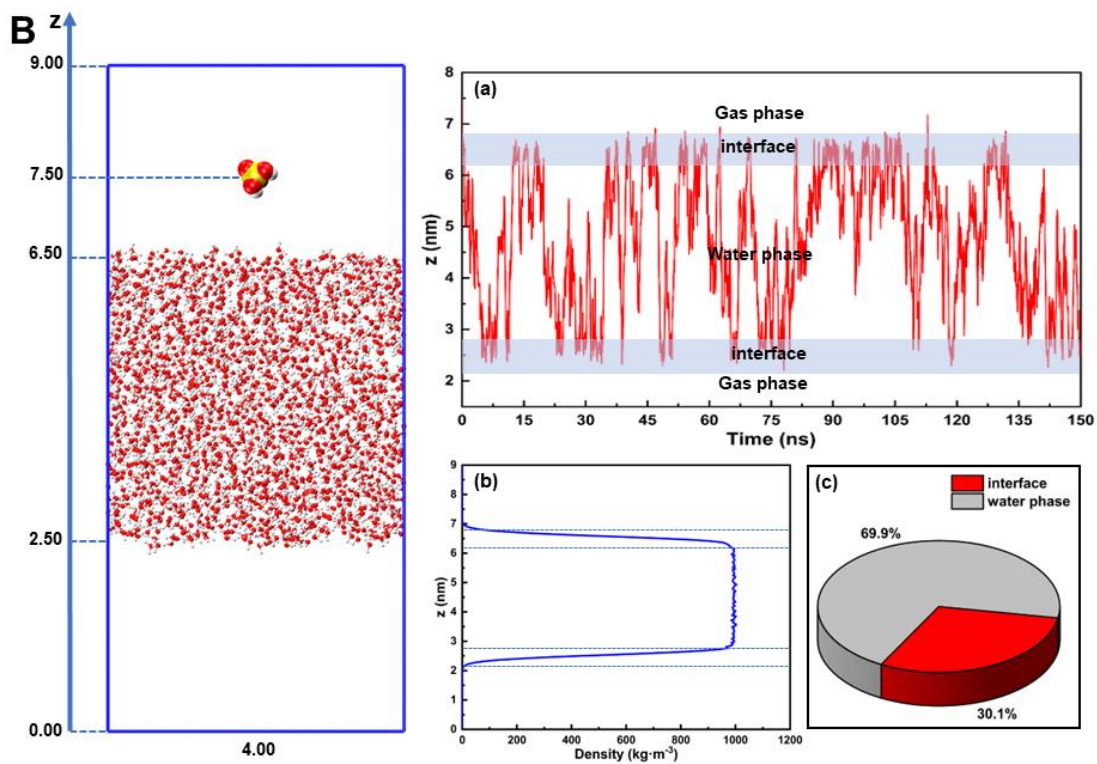

1

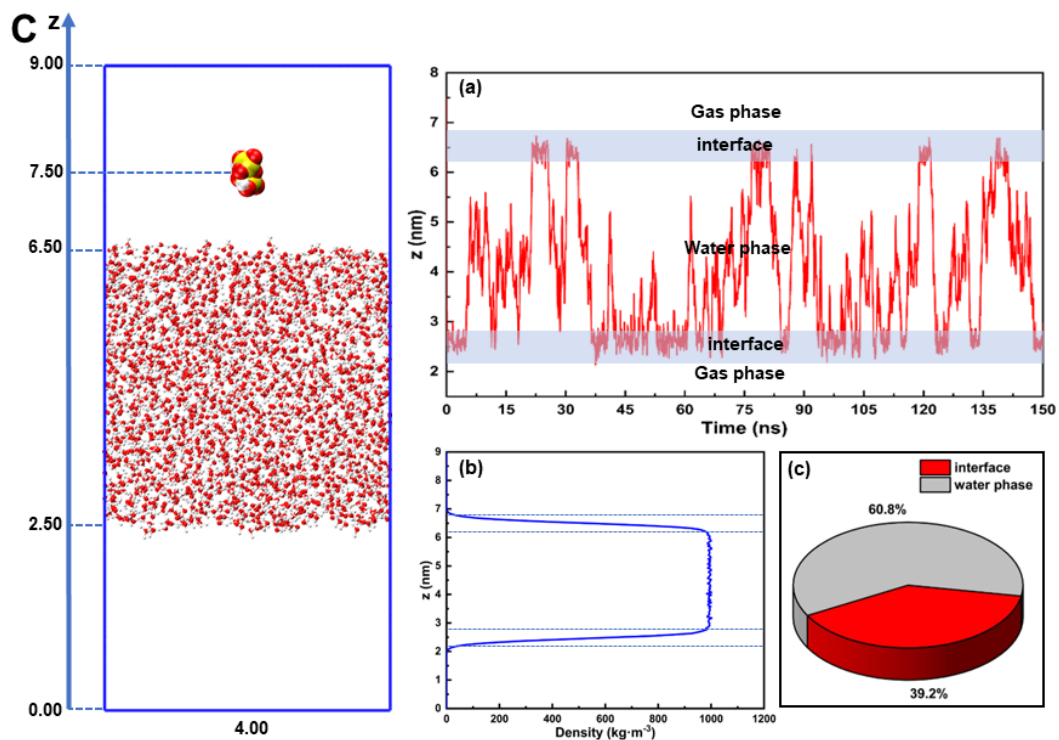

1

2 **Figure S2** The  $z$  coordinates of  $\text{SO}_3$  (A),  $\text{H}_2\text{SO}_4$  (B) and  $\text{H}_2\text{S}_2\text{O}_7$  (C) molecule as the function of simulation time,  
 3 (a) the density profile of water (b) and the pie chart with the occurrence percentages (c) at the air-water interface  
 4 and in water phase

5

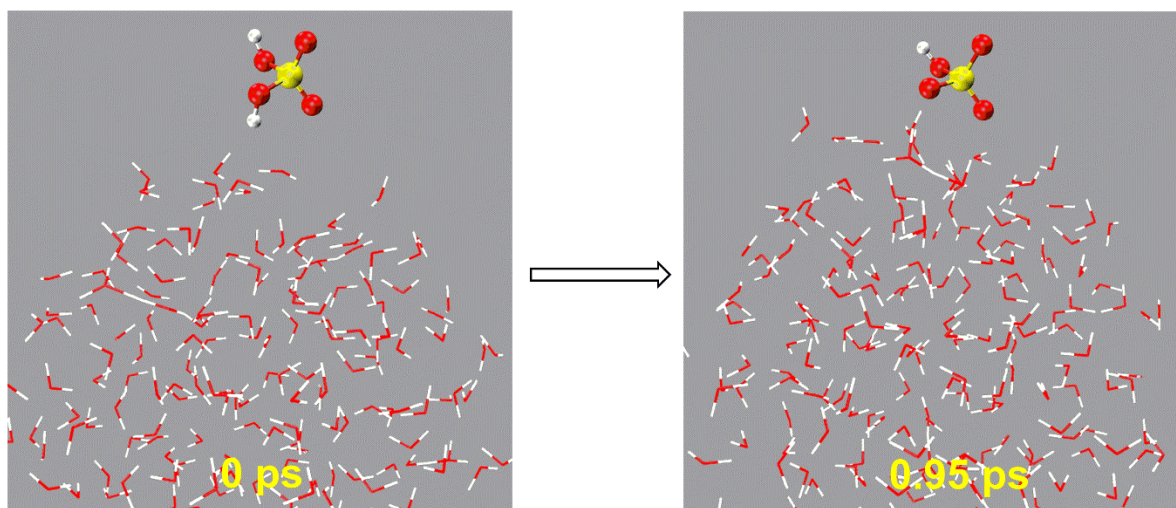

1  
2  
3  
4

**Figure S3** Snapshot structures taken from the BOMD simulations of  $\text{H}_2\text{SO}_4$  reaction at the air-water interface. The white, red and yellow spheres represent H, O and S atoms, respectively.



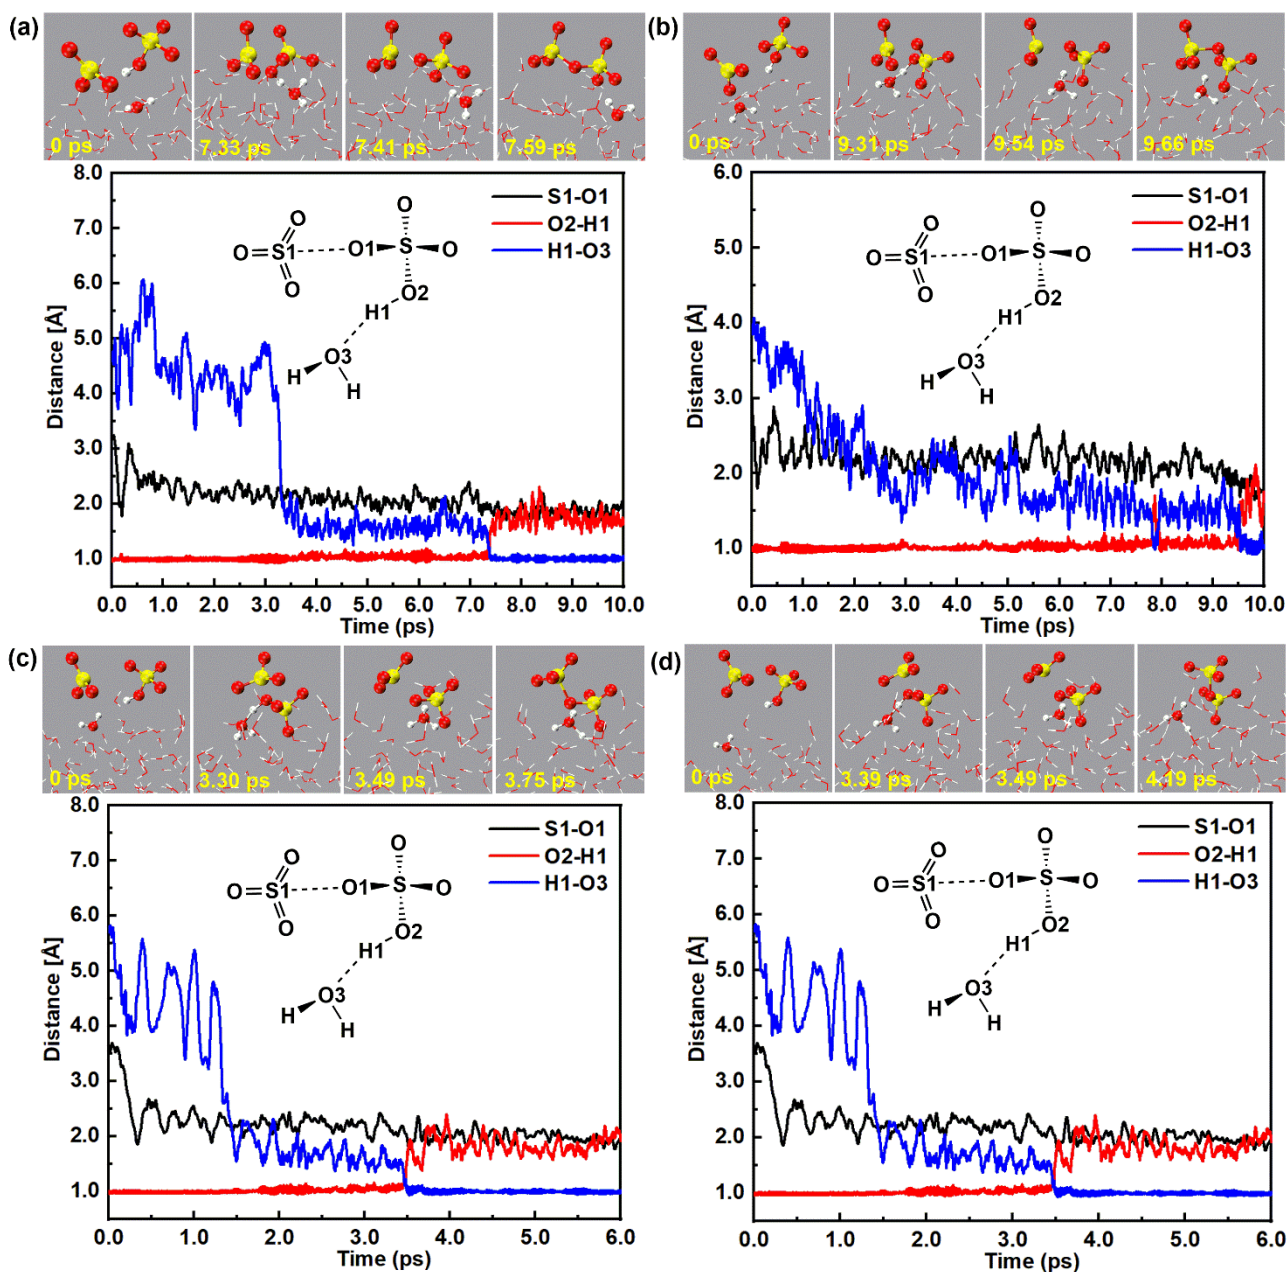

1  
2  
3  
4  
5  
6  
7

**Figure S4** Two BOMD trajectories and snapshots for H<sub>2</sub>O-induced the formation of S<sub>2</sub>O<sub>7</sub><sup>2-</sup>...H<sub>3</sub>O<sup>+</sup> ion pair from the reaction of SO<sub>3</sub> with HSO<sub>4</sub><sup>-</sup> at the air-water interface (Top panel: Snapshot structures taken from the BOMD simulations, which illustrate H<sub>2</sub>O-induced the formation of S<sub>2</sub>O<sub>7</sub><sup>2-</sup>...H<sub>3</sub>O<sup>+</sup> ion pair from the reaction of SO<sub>3</sub> with HSO<sub>4</sub><sup>-</sup> at the air-water interface. Lower panel: time evolution of key bond distances (S-O1, O2-H1, and O3-H1) involved in the induced mechanism.)



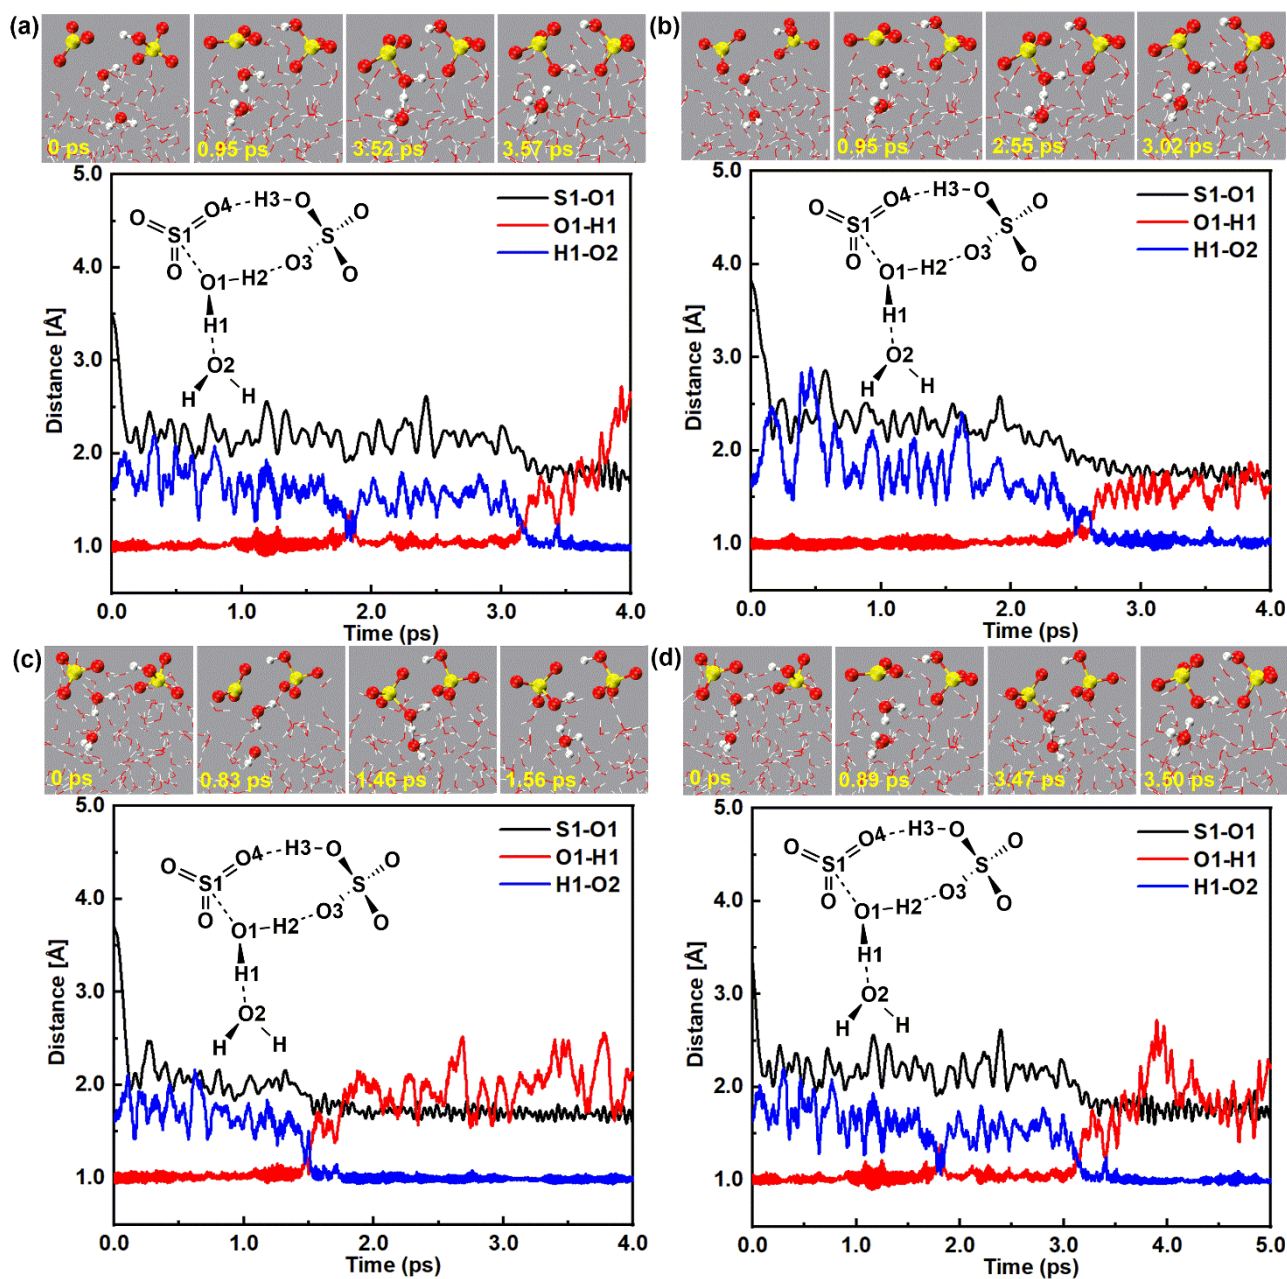

1  
2  
3  
4  
5  
6  
7

**Figure S5** Two BOMD trajectories and snapshots for the direct  $\text{HSO}_4^-$ -mediated formation of  $\text{HSO}_4^- \cdots \text{H}_3\text{O}^+$  ion pair at the air water interface (Top panel: Snapshot structures taken from the BOMD simulations, which illustrate the direct  $\text{HSO}_4^-$ -mediated formation of  $\text{HSO}_4^- \cdots \text{H}_3\text{O}^+$  ion pair at the air water interface. Lower panel: time evolution of key bond distances (S1-O1, O1-H1 and H1-O2) involved in the hydration mechanism.)

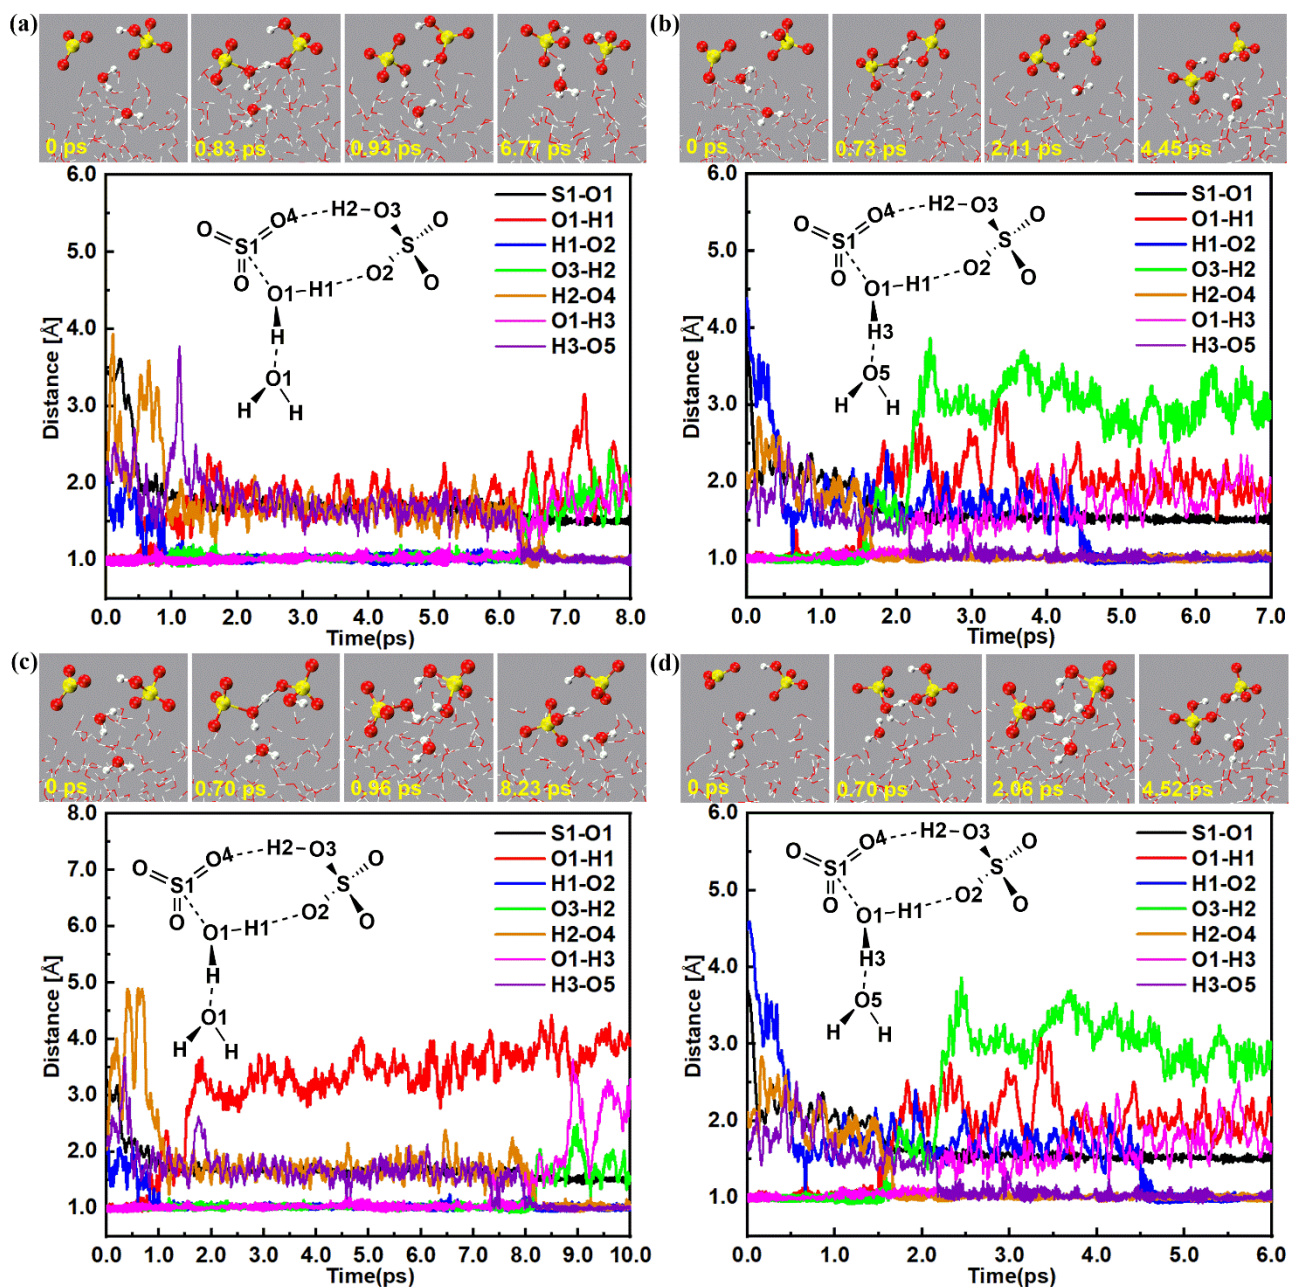

1  
 2 **Figure S6** Two BOMD trajectories and snapshots for the indirect  $\text{HSO}_4^-$ -mediated formation of  $\text{HSO}_4^- \cdots \text{H}_3\text{O}^+$   
 3 ion pair at the air water interface (Top panel: Snapshot structures taken from the BOMD simulations, which  
 4 illustrate the indirect  $\text{HSO}_4^-$ -mediated formation of  $\text{HSO}_4^- \cdots \text{H}_3\text{O}^+$  ion pair at the air water interface. Lower  
 5 panel: time evolution of key bond distances (S1-O1, O1-H1 and H1-O2) involved in the hydration mechanism.)  
 6



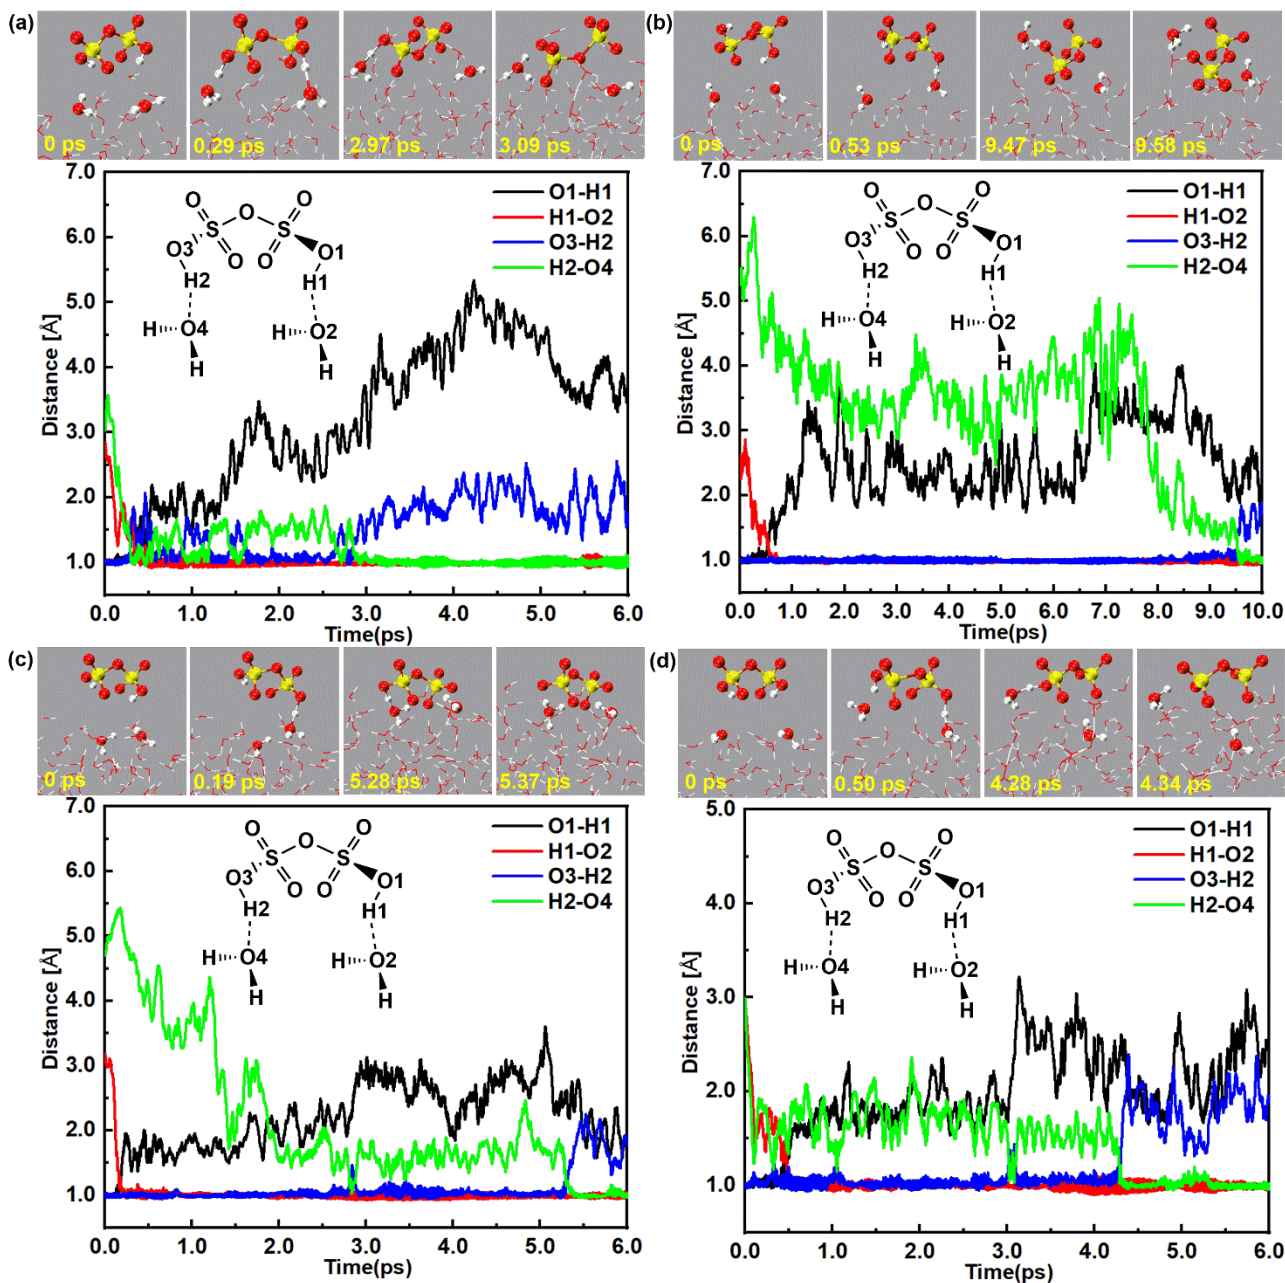

1  
2  
3  
4  
5  
6

**Figure S7** Two BOMD trajectories and snapshots for the deprotonation of  $\text{H}_2\text{S}_2\text{O}_7$  at the air water interface (Top panel: Snapshot structures taken from the BOMD simulations, which illustrate the deprotonation of  $\text{H}_2\text{S}_2\text{O}_7$  at the air water interface. Lower panel: time evolution of key bond distances (O1-H1, H1-O2, O3-H2 and H2-O4) involved in the hydration mechanism.)

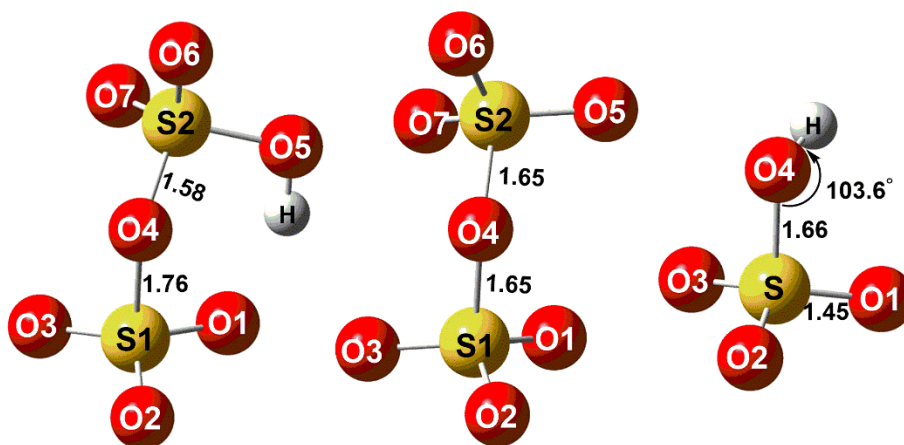

1  
 2 **Figure S8** The optimized geometrical structures of  $\text{HS}_2\text{O}_7^-$ ,  $\text{S}_2\text{O}_7^{2-}$  and  $\text{HSO}_4^-$  ion at M06-2X/6-  
 3 311++G(2df,2pd) level of theory  
 4

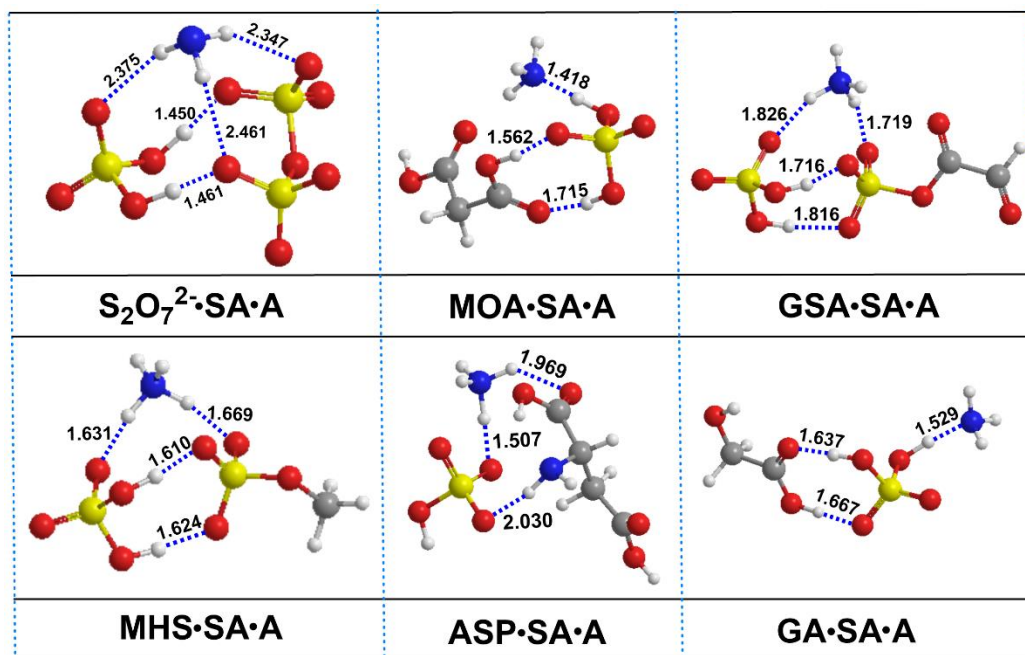

1  
 2 **Figure S9** The most stable configurations of the (SA)<sub>1</sub>(A)<sub>1</sub>(Acid)<sub>1</sub> clusters identified at the M06-2X/6-311++G  
 3 (2df,2pd) level of theory. SA<sup>-</sup>, SA, A, MOA, GSA, MHS, ASP and GA are respectively HS<sub>2</sub>O<sub>4</sub><sup>-</sup>, H<sub>2</sub>SO<sub>4</sub>, NH<sub>3</sub>,  
 4 HOOCCH<sub>2</sub>COOH, HOCCOOSO<sub>3</sub>H, CH<sub>3</sub>OSO<sub>3</sub>H, HOCC(H)NH<sub>2</sub>COOH and HOCH<sub>2</sub>COOH. The lengths of  
 5 hydrogen bonds are given in Å. (blue = nitrogen, yellow = sulfur, red = oxygen, gray = carbon, and white =  
 6 hydrogen.)  
 7

1 **Table S9** Gibbs free energy ( $\Delta G$ , kcal·mol<sup>-1</sup>), equilibrium constant ( $K_{\text{eq}}$ , cm<sup>3</sup>·molecule<sup>-1</sup>) and the concentrations  
 2 of SA, SO<sub>3</sub> and DSA computed at the CCSD(T)-F12/cc-pVDZ-F12//M06-2X/6-311++G(2df,2pd) level of  
 3 theory

| $\Delta G$ | Altitude (km) | $T$ (K) | $K_{\text{eq}}$        | [SA]/(molecules·cm <sup>-3</sup> ) |
|------------|---------------|---------|------------------------|------------------------------------|
| -1.6       | 0             | 298.15  | $1.14 \times 10^{-20}$ | $(3.70 \times 10^8)^{\text{a}}$    |
|            | 5             | 259.30  | $1.66 \times 10^{-17}$ | $(6.00 \times 10^7)^{\text{a}}$    |
|            | 10            | 229.70  | $3.97 \times 10^{-16}$ | $(5.10 \times 10^9)^{\text{b}}$    |
|            | 15            | 212.60  | $3.85 \times 10^{-16}$ | $(2.40 \times 10^5)^{\text{a}}$    |
|            | 20            | 215.50  | $2.51 \times 10^{-15}$ | $(4.20 \times 10^4)^{\text{a}}$    |
|            | 25            | 218.60  | $1.66 \times 10^{-15}$ | $(4.59 \times 10^5)^{\text{a}}$    |
|            | 30            | 223.70  | $8.50 \times 10^{-16}$ | $(2.88 \times 10^6)^{\text{a}}$    |

4 <sup>a</sup> The values were taken from reference (*J. Atmos. Sci.*, 1979, 36, 699-717.)

5 <sup>b</sup> The values were taken from reference (*Geophys. Res. Lett.*, 2002, 29, 1113.)

6

## 1 **Part 5 Atmospheric concentrations of DSA under different SO<sub>3</sub> scenarios**

2 The steady-state concentration of DSA was calculated using the calculated equilibrium constant listed in  
3 Eq. S5.

$$4 \quad K_{\text{eq3}} = \frac{[\text{DSA}]}{[\text{SO}_3][\text{SA}]} \quad (\text{S5})$$

5 where  $K_{\text{eq3}}$  is the equilibrium constant of DSA with respect to SO<sub>3</sub> and H<sub>2</sub>SO<sub>4</sub> within the altitude range of 0-30  
6 km shown in Table S9; [SO<sub>3</sub>], [SA] and [DSA] are the concentrations of SO<sub>3</sub>, H<sub>2</sub>SO<sub>4</sub>, and H<sub>2</sub>S<sub>2</sub>O<sub>7</sub>, respectively.  
7 Although the concentration of sulfur trioxide remains unknown at different altitudes, experimental observations  
8 have shown that the concentration of sulfur trioxide can reach 10<sup>6</sup> molecules cm<sup>-3</sup> in the troposphere. (Yao et al.,  
9 2020). Moreover, water vapor concentrations significantly decrease with increasing of altitude. Consequently,  
10 the concentration of sulfur trioxide should be higher in the stratosphere than in the troposphere (Long et al.,  
11 2022), and its concentration would increase as a result of geoengineered injection of SO<sub>2</sub> or SO<sub>3</sub>. Besides, it is  
12 worth noting that H<sub>2</sub>SO<sub>4</sub> can form at the end and outside the engine, and flight measurements in the exhaust  
13 plume have measured sulfuric acid abundances up to a value of 600 pptv. (Curtius et al., 2002). When an  
14 average flight altitude of 10 km is considered, this corresponds to a concentration of 5.1 × 10<sup>9</sup> molecules·cm<sup>-3</sup>.  
15 Therefore, we have calculated the concentrations of DSA according to concentrations of sulfur trioxide in the  
16 range from 10<sup>7</sup> to 10<sup>14</sup> molecules cm<sup>-3</sup> and the concentrations of H<sub>2</sub>SO<sub>4</sub> in the range of 10<sup>4</sup>-10<sup>9</sup> molecules cm<sup>-3</sup>  
17 as shown in Figure S9.

### 18 **Reference:**

- 19 Curtius, J., Arnold, F., and Schulte, P.: Sulfuric acid measurements in the exhaust plume of a jet aircraft in flight:  
20 Implications for the sulfuric acid formation efficiency, *Geophys. Res. Lett.*, 29, 17-11-17-14, 2002.
- 21 Long, B., Xia, Y., Bao, J. L., Carmona-García, J., Gómez Martín, J. C., Plane, J. M. C., Saiz-Lopez, A., Roca-  
22 Sanjuán, D., and Francisco, J. S.: Reaction of SO<sub>3</sub> with HONO<sub>2</sub> and Implications for Sulfur Partitioning in  
23 the Atmosphere, *J. Am. Chem. Soc.*, 144, 9172-9177, 10.1021/jacs.2c03499, 2022.
- 24 Yao, L., Fan, X., Yan, C., Kurtén, T., Daellenbach, K. R., Li, C., Wang, Y., Guo, Y., Dada, L., Rissanen, M. P.,  
25 Cai, J., Tham, Y. J., Zha, Q., Zhang, S., Du, W., Yu, M., Zheng, F., Zhou, Y., Kontkanen, J., Chan, T., Shen,  
26 J., Kujansuu, J. T., Kangasluoma, J., Jiang, J., Wang, L., Worsnop, D. R., Petäjä, T., Kerminen, V. M., Liu,  
27 Y., Chu, B., He, H., Kulmala, M., and Bianchi, F.: Unprecedented Ambient Sulfur Trioxide (SO<sub>3</sub>)  
28 Detection: Possible Formation Mechanism and Atmospheric Implications, *Environ. Sci. Technol. Lett.*, 7,  
29 809-818, 10.1021/acs.estlett.0c00615, 2020.

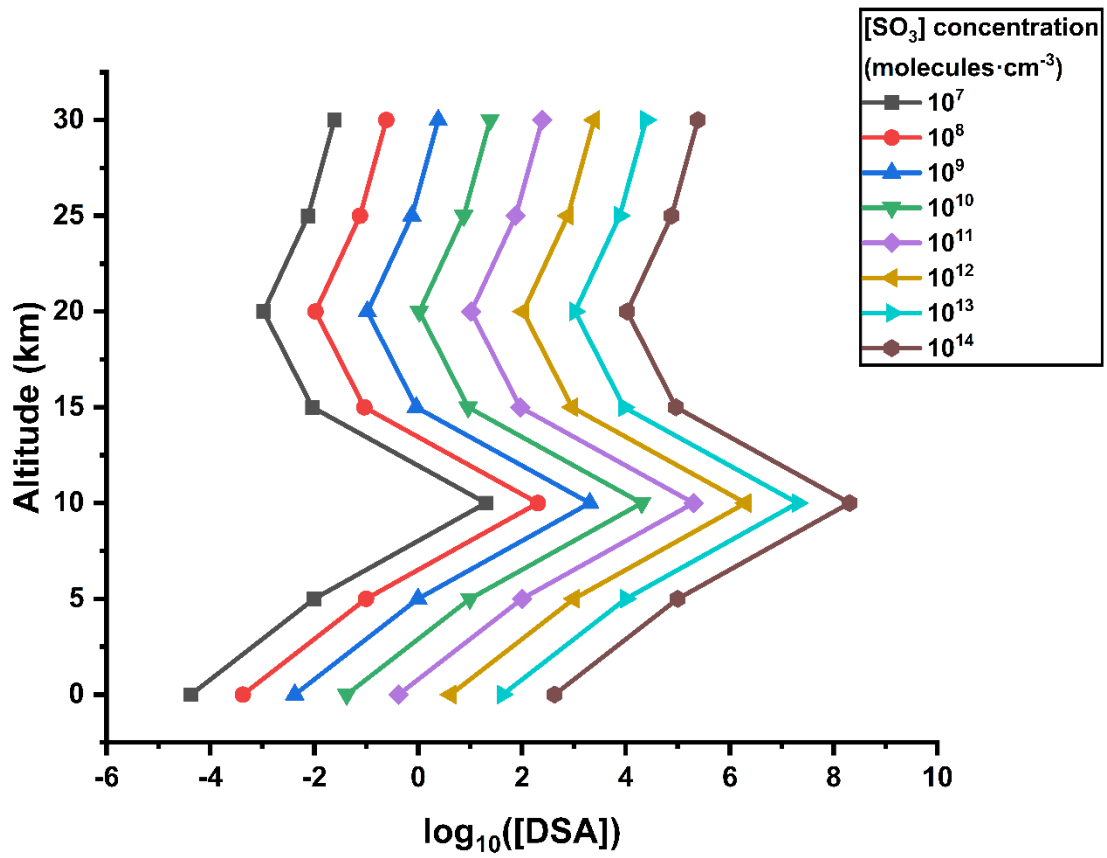

1  
2  
3  
4  
5

**Figure S10** Concentration (unit: molecules · cm<sup>-3</sup>) of DSA with respect to different concentrations of SO<sub>3</sub> as function of altitude. We consider the possible concentrations of SO<sub>3</sub> with the injection of SO<sub>3</sub>.



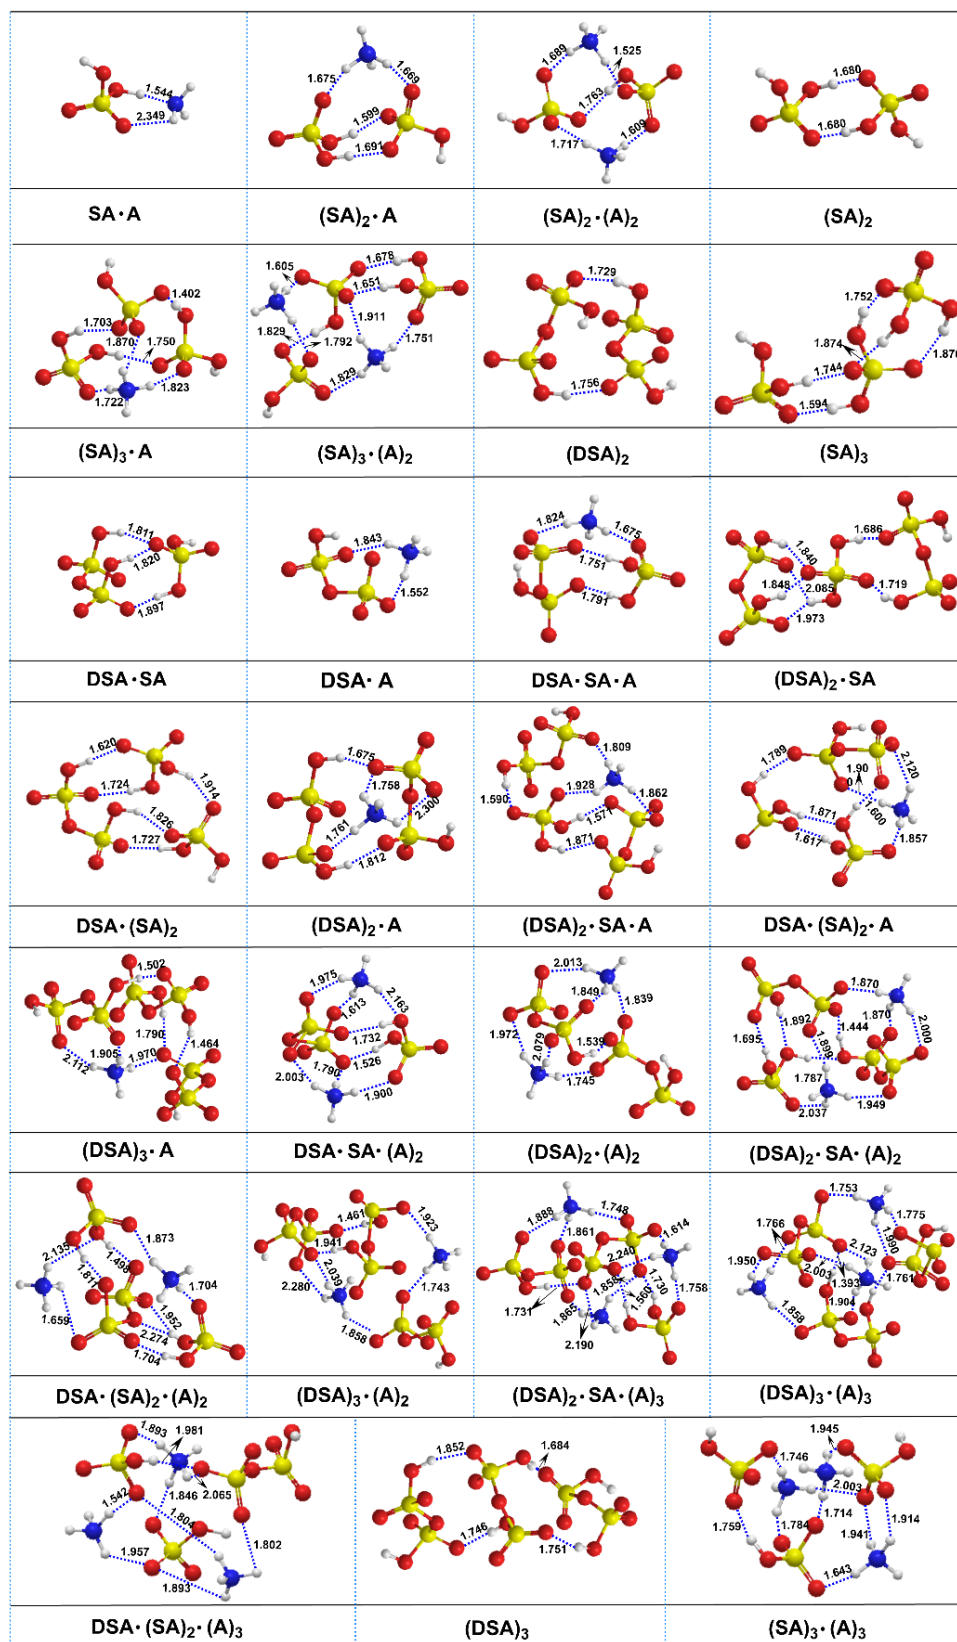

**Figure S11** The most stable configurations of the DSA-SA-A-based clusters identified at the M06-2X/6-311++G(2df,2pd) level of theory. DSA, SA, A are the shorthand for disulfuric acid, sulfuric acid and ammonia, respectively. The lengths of hydrogen bonds are given in Å. (blue = nitrogen, yellow = sulfur, red = oxygen, gray = carbon, and white = hydrogen.)

**Table S10** The Gibbs free energy  $\Delta G$  (kcal·mol<sup>-1</sup>) of formation of all clusters at pressure of 1 atm and the temperature range of 218.15-298.15 K, calculated at DLPNO-CCSD(T)/aug-cc-pVTZ//M06-2X/6-311++G(2df,2pd) level of theory

| Clusters                                                | $T = 298.15$ K   | $T = 278.15$ K   | $T = 258.15$ K   | $T = 238.15$ K    | $T = 218.15$ K   |
|---------------------------------------------------------|------------------|------------------|------------------|-------------------|------------------|
| (DSA) <sub>2</sub>                                      | -5.0             | -5.8             | -6.7             | -7.5              | -8.4             |
| (DSA) <sub>3</sub>                                      | -4.6             | -6.2             | -7.9             | -9.6              | -11.3            |
| (SA) <sub>1</sub> ·(DSA) <sub>1</sub>                   | -4.7             | -5.5             | -6.3             | -7.2              | -8.0             |
| (SA) <sub>1</sub> ·(DSA) <sub>2</sub>                   | -8.8             | -10.4            | -12.1            | -13.7             | -16.0            |
| (SA) <sub>2</sub> ·(DSA) <sub>1</sub>                   | -6.8             | -8.6             | -10.4            | -12.2             | -14.0            |
| (DSA) <sub>1</sub> ·(A) <sub>1</sub>                    | -15.3            | -16.1            | -16.9            | -17.6             | -18.4            |
| (DSA) <sub>2</sub> ·(A) <sub>1</sub>                    | -24.8            | -26.4            | -28.0            | -29.7             | -31.3            |
| (DSA) <sub>3</sub> ·(A) <sub>1</sub>                    | -32.3            | -34.8            | -37.4            | -40.0             | -42.5            |
| (DSA) <sub>2</sub> ·(A) <sub>2</sub>                    | -41.9            | -44.3            | -46.7            | -49.1             | -51.5            |
| (SA) <sub>1</sub> ·(DSA) <sub>1</sub> ·(A) <sub>1</sub> | -25.9            | -27.4            | -29.0            | -30.5             | -32.0            |
| (SA) <sub>1</sub> ·(DSA) <sub>2</sub> ·(A) <sub>1</sub> | -32.8            | -35.3            | -37.8            | -40.3             | -43.3            |
| (SA) <sub>2</sub> ·(DSA) <sub>1</sub> ·(A) <sub>1</sub> | -31.9            | -34.2            | -36.6            | -38.9             | -41.3            |
| (SA) <sub>1</sub> ·(DSA) <sub>1</sub> ·(A) <sub>2</sub> | -37.9            | -40.3            | -42.8            | -45.2             | -47.7            |
| (SA) <sub>1</sub> ·(DSA) <sub>2</sub> ·(A) <sub>2</sub> | -49.1            | -52.4            | -55.7            | -59.0             | -62.3            |
| (SA) <sub>2</sub> ·(DSA) <sub>1</sub> ·(A) <sub>2</sub> | -48.4            | -51.7            | -55.0            | -58.3             | -61.6            |
| (SA) <sub>2</sub> ·(DSA) <sub>1</sub> ·(A) <sub>3</sub> | -61.3            | -65.2            | -69.1            | -73.0             | -77.0            |
| (SA) <sub>1</sub> ·(DSA) <sub>2</sub> ·(A) <sub>3</sub> | -73.9            | -77.9            | -81.8            | -85.8             | -89.8            |
| (DSA) <sub>3</sub> ·(A) <sub>3</sub>                    | -69.5            | -73.6            | -77.6            | -81.7             | -85.8            |
| (DSA) <sub>3</sub> ·(A) <sub>2</sub>                    | -51.6            | -54.8            | -58.1            | -61.4             | -64.7            |
| (SA) <sub>2</sub>                                       | -7.8<br>(-8.4)   | -8.6<br>(-9.1)   | -9.1<br>(-9.8)   | -9.8<br>(-10.5)   | -10.5<br>(-11.1) |
| (SA) <sub>3</sub>                                       | -12.5<br>(-13.9) | -14.0<br>(-15.5) | -15.7<br>(-17.0) | -17.1<br>(-18.5)  | -18.7<br>(-20.1) |
| (SA) <sub>1</sub> ·(A) <sub>1</sub>                     | -5.7<br>(-7.3)   | -6.3<br>(-7.9)   | -7.0<br>(-8.5)   | -7.6<br>(-9.2)    | -8.3<br>(-9.8)   |
| (SA) <sub>2</sub> ·(A) <sub>1</sub>                     | -20.5<br>(-20.8) | -22.0<br>(-22.4) | -23.5<br>(-24.0) | -25.1<br>(-25.5)  | -26.6<br>(-27.1) |
| (SA) <sub>2</sub> ·(A) <sub>2</sub>                     | -26.6<br>(-26.6) | -28.9<br>(-28.8) | -31.1<br>(-31.0) | -33.4<br>(-33.28) | -35.6<br>(-35.5) |
| (SA) <sub>3</sub> ·(A) <sub>1</sub>                     | -27.4<br>(-30.2) | -29.8<br>(-32.5) | -32.2<br>(-34.8) | -34.6<br>(-37.1)  | -37.2<br>(-39.5) |
| (SA) <sub>3</sub> ·(A) <sub>2</sub>                     | -40.5<br>(-41.8) | -43.6<br>(-44.9) | -46.7<br>(-47.9) | -49.8<br>(-51.0)  | -52.9<br>(-54.1) |
| (SA) <sub>3</sub> ·(A) <sub>3</sub>                     | -51.2<br>(-52.8) | -55.0<br>(-56.6) | -58.9<br>(-60.5) | -62.8<br>(-64.3)  | -66.7<br>(-68.1) |

The values in parentheses were taken from (Zhang, H., Kupiainen-Määttä, O., Zhang, X., Molinero, V., Zhang, Y., and Li, Z.: The enhancement mechanism of glycolic acid on the formation of atmospheric sulfuric acid–ammonia molecular clusters, *J. Chem. Phys.*, 146, 184308, 10.1063/1.4982929, 2017.)

$T = 218.15 \text{ K}$ ,  $[SA] = 10^6 \text{ molecules}\cdot\text{cm}^{-3}$ ,  $[A] = 10^9 \text{ molecules}\cdot\text{cm}^{-3}$ ,  $[DSA] = 10^4 \text{ molecules}\cdot\text{cm}^{-3}$

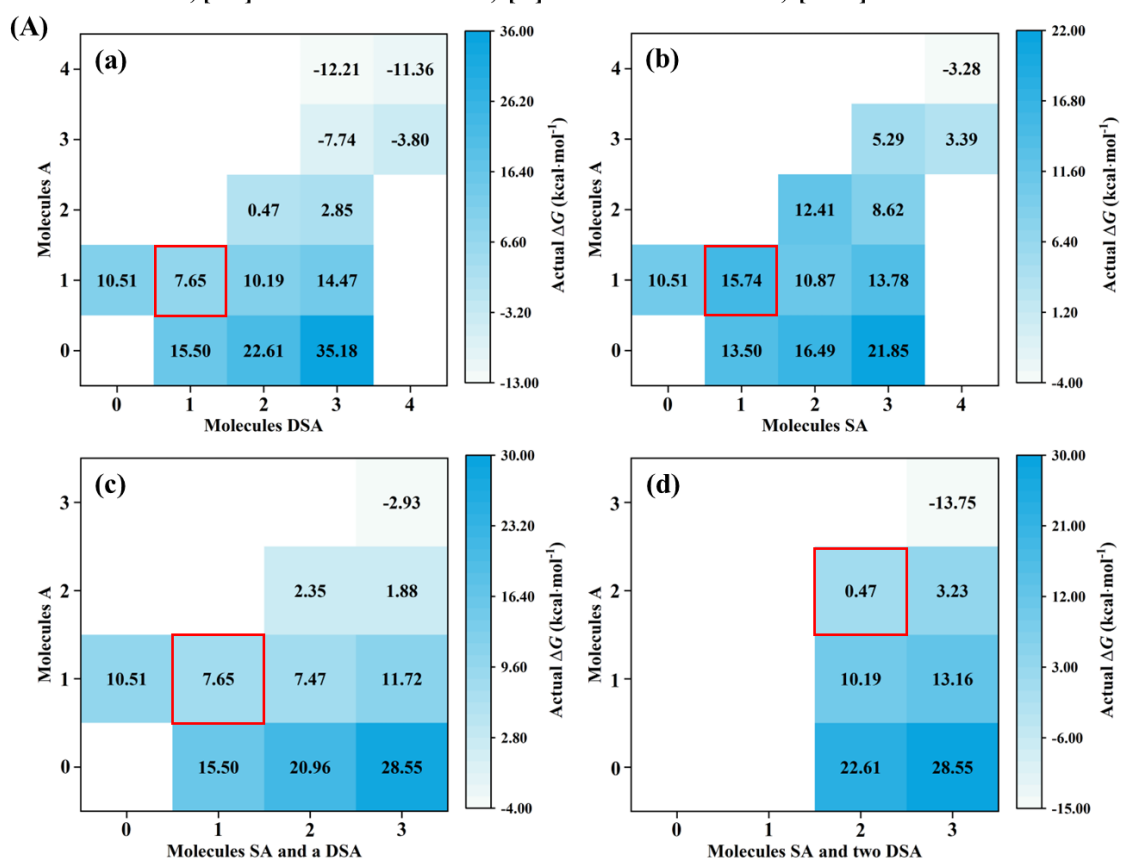

$T = 218.15 \text{ K}$ ,  $[SA] = 10^6 \text{ molecules}\cdot\text{cm}^{-3}$ ,  $[A] = 10^9 \text{ molecules}\cdot\text{cm}^{-3}$ ,  $[DSA] = 10^7 \text{ molecules}\cdot\text{cm}^{-3}$

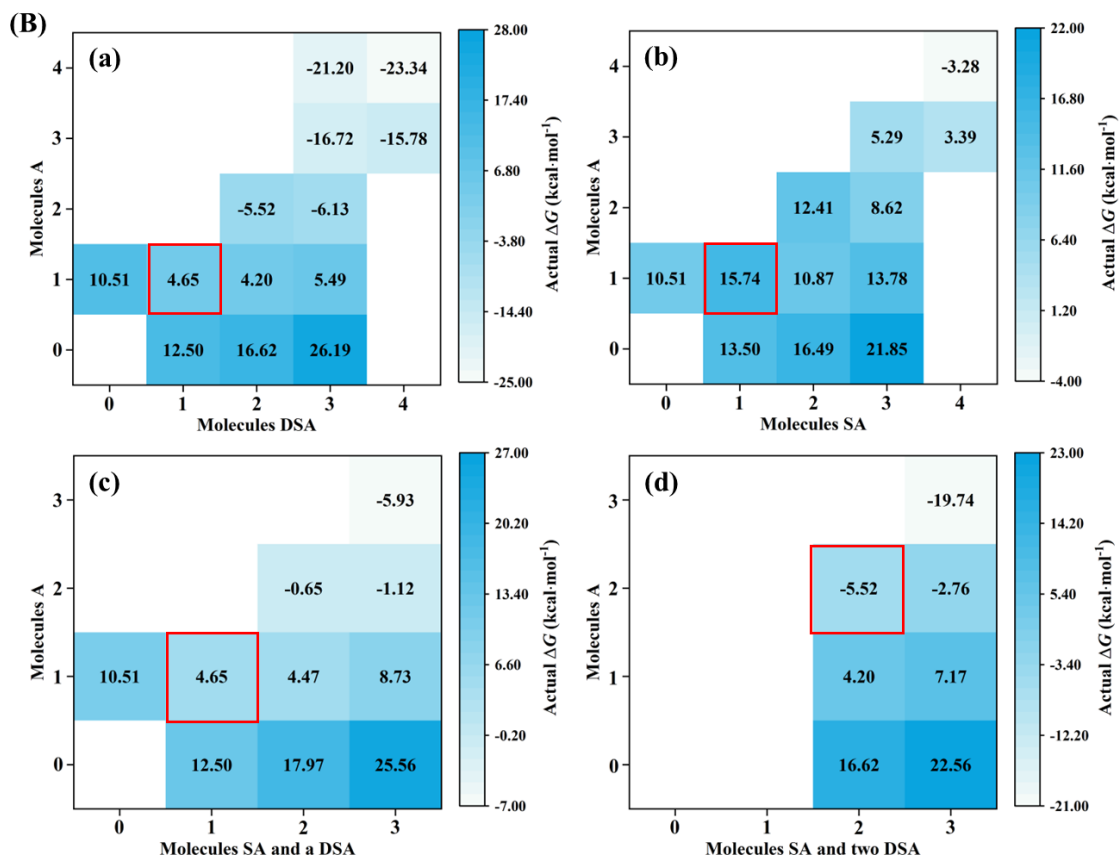

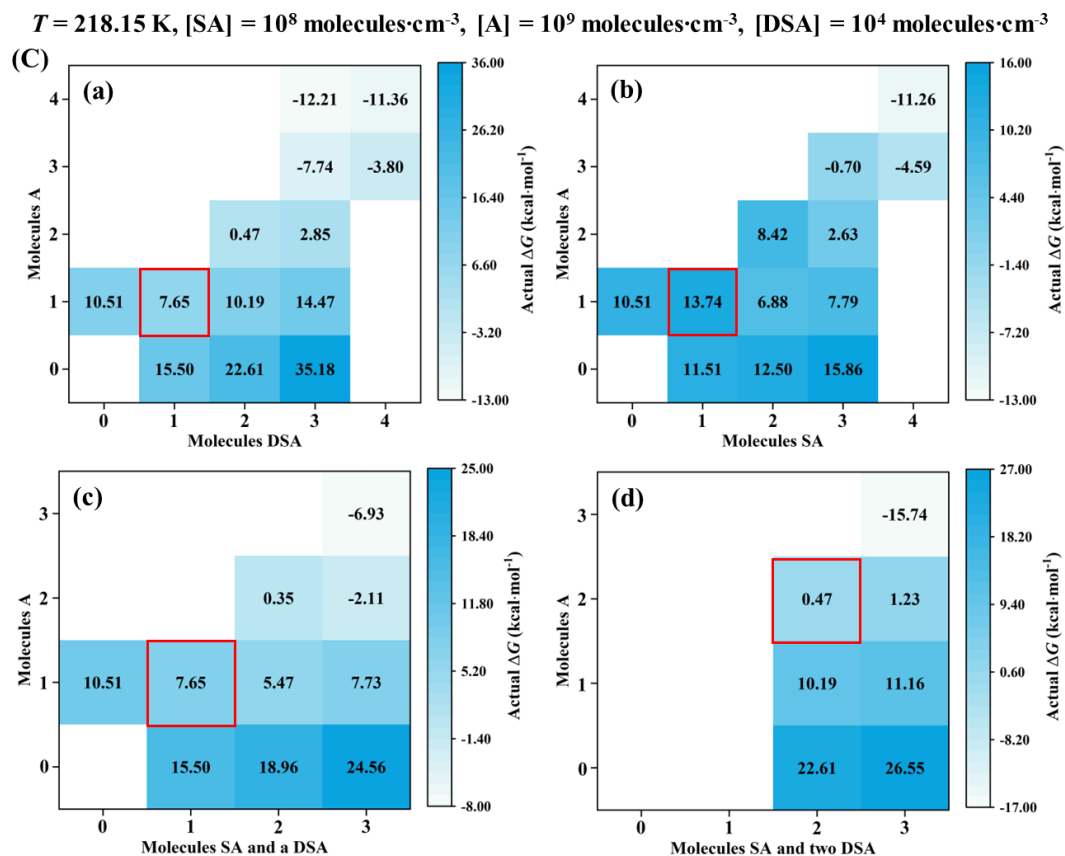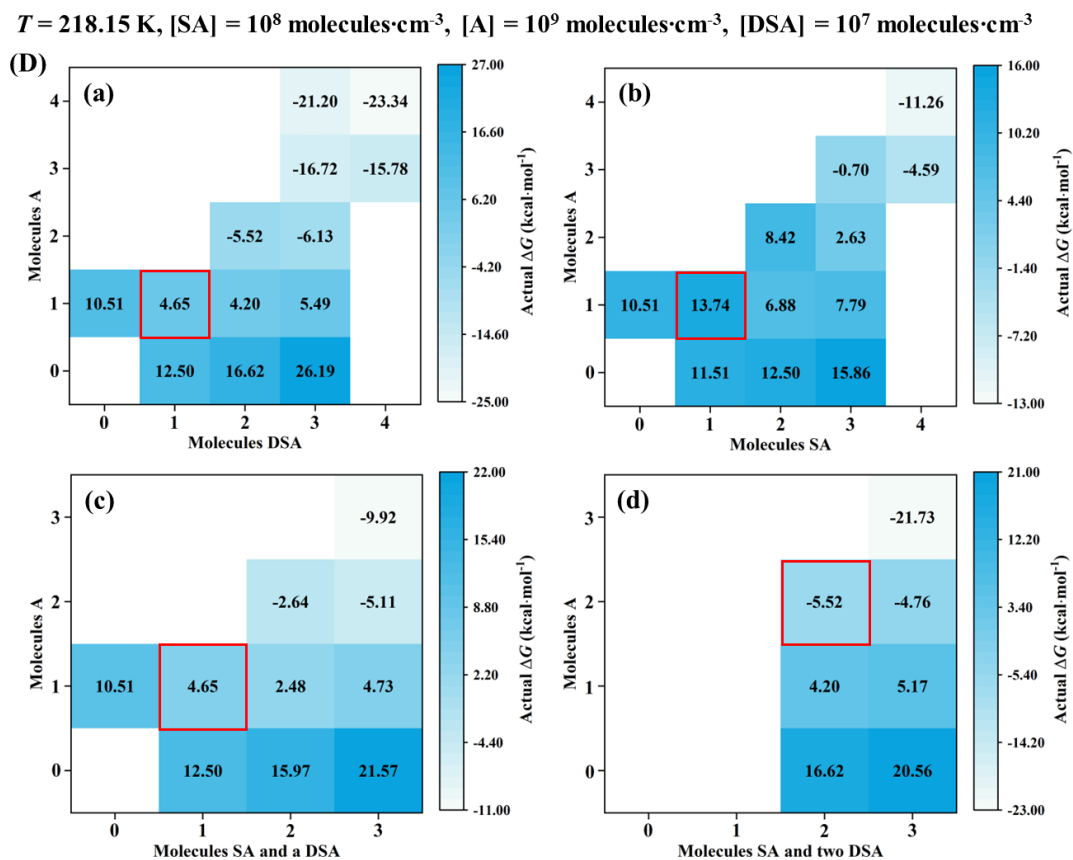

**Figure S12** A typical actual  $\Delta G$  surface at 218.15 K.  $[\text{SA}]$  is the concentration of sulfuric acid monomers,  $[\text{A}]$  the concentration of ammonia monomers and  $[\text{DSA}]$  is disulfuric acid

$T = 238.15 \text{ K}$ ,  $[\text{SA}] = 10^6 \text{ molecules}\cdot\text{cm}^{-3}$ ,  $[\text{A}] = 10^9 \text{ molecules}\cdot\text{cm}^{-3}$ ,  $[\text{DSA}] = 10^4 \text{ molecules}\cdot\text{cm}^{-3}$

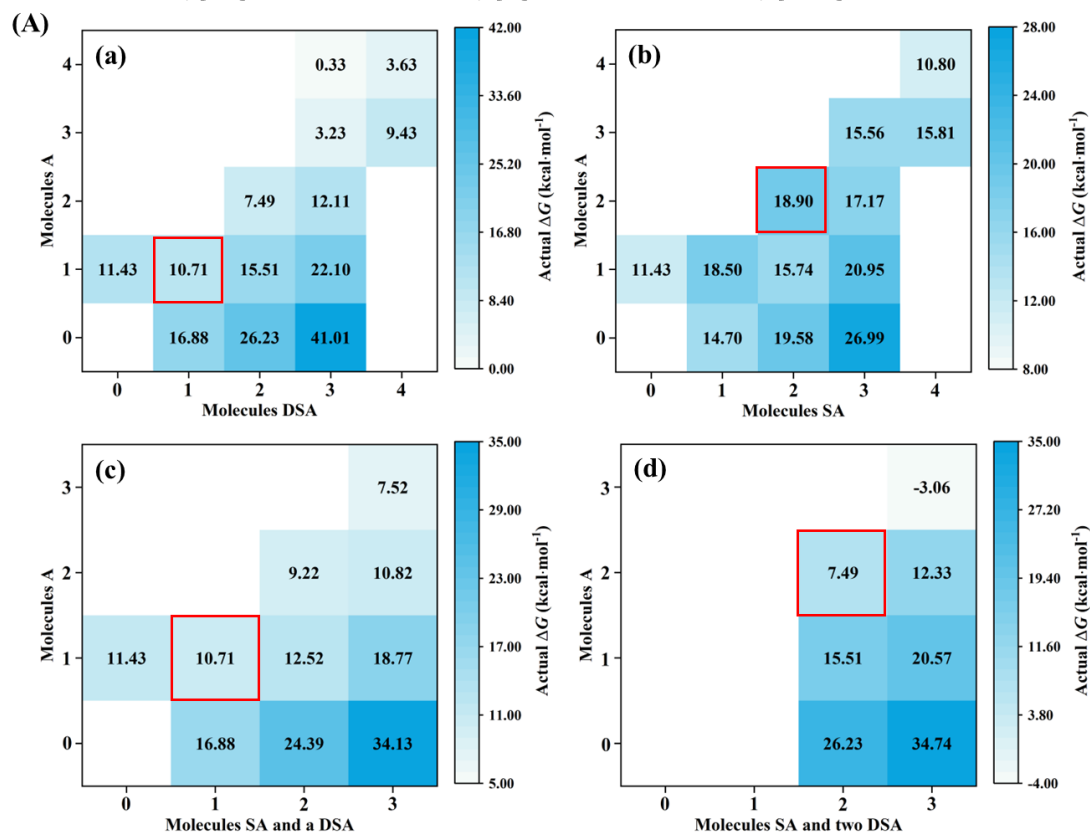

$T = 238.15 \text{ K}$ ,  $[\text{SA}] = 10^6 \text{ molecules}\cdot\text{cm}^{-3}$ ,  $[\text{A}] = 10^9 \text{ molecules}\cdot\text{cm}^{-3}$ ,  $[\text{DSA}] = 10^7 \text{ molecules}\cdot\text{cm}^{-3}$

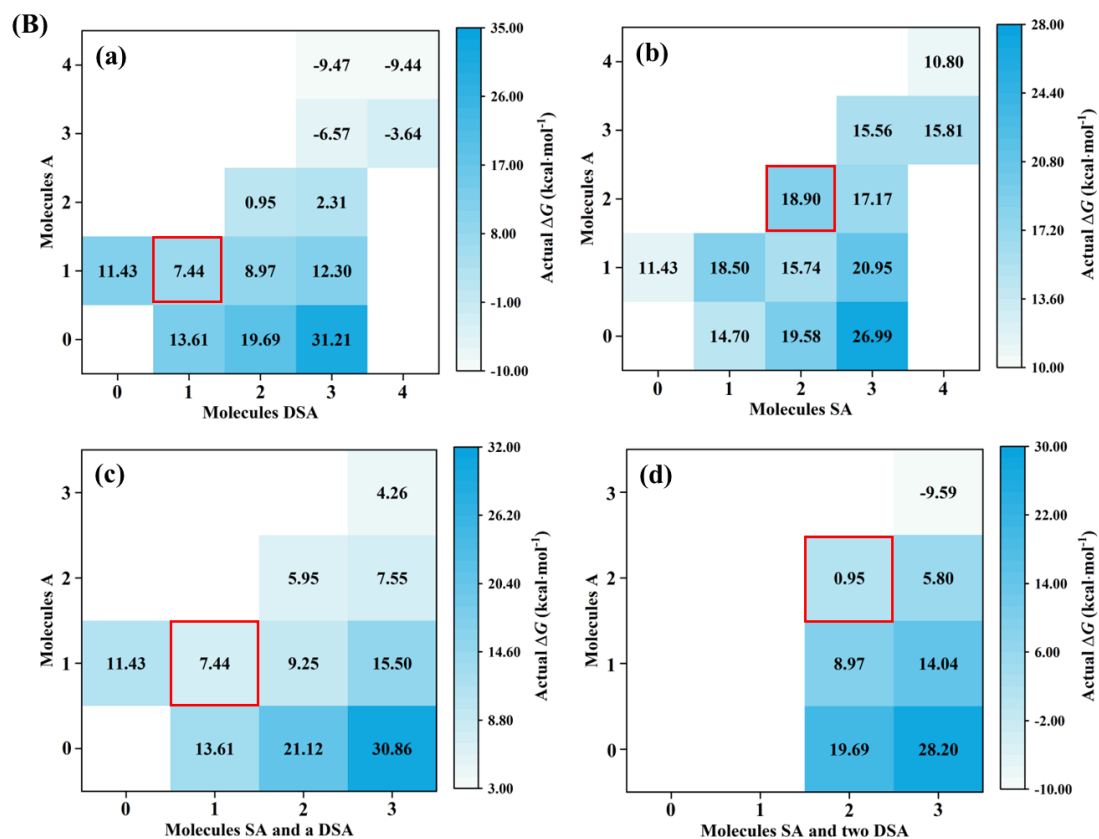

$T = 238.15 \text{ K}$ ,  $[\text{SA}] = 10^8 \text{ molecules}\cdot\text{cm}^{-3}$ ,  $[\text{A}] = 10^9 \text{ molecules}\cdot\text{cm}^{-3}$ ,  $[\text{DSA}] = 10^4 \text{ molecules}\cdot\text{cm}^{-3}$

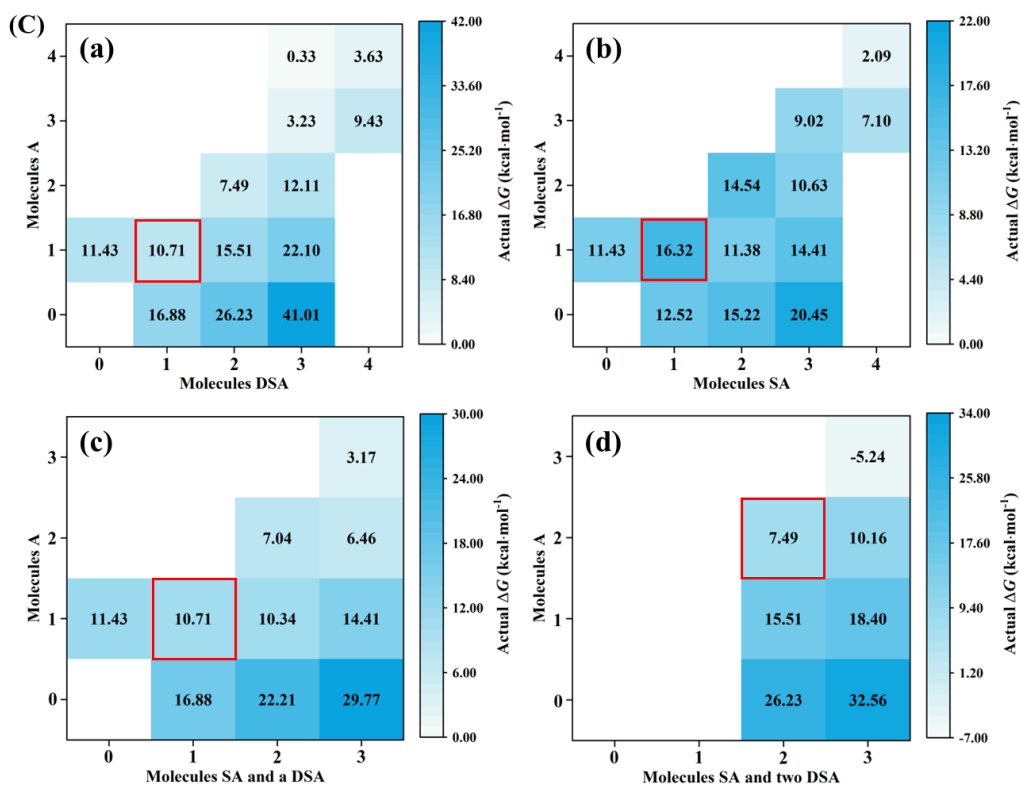

$T = 238.15 \text{ K}$ ,  $[\text{SA}] = 10^8 \text{ molecules}\cdot\text{cm}^{-3}$ ,  $[\text{A}] = 10^9 \text{ molecules}\cdot\text{cm}^{-3}$ ,  $[\text{DSA}] = 10^7 \text{ molecules}\cdot\text{cm}^{-3}$

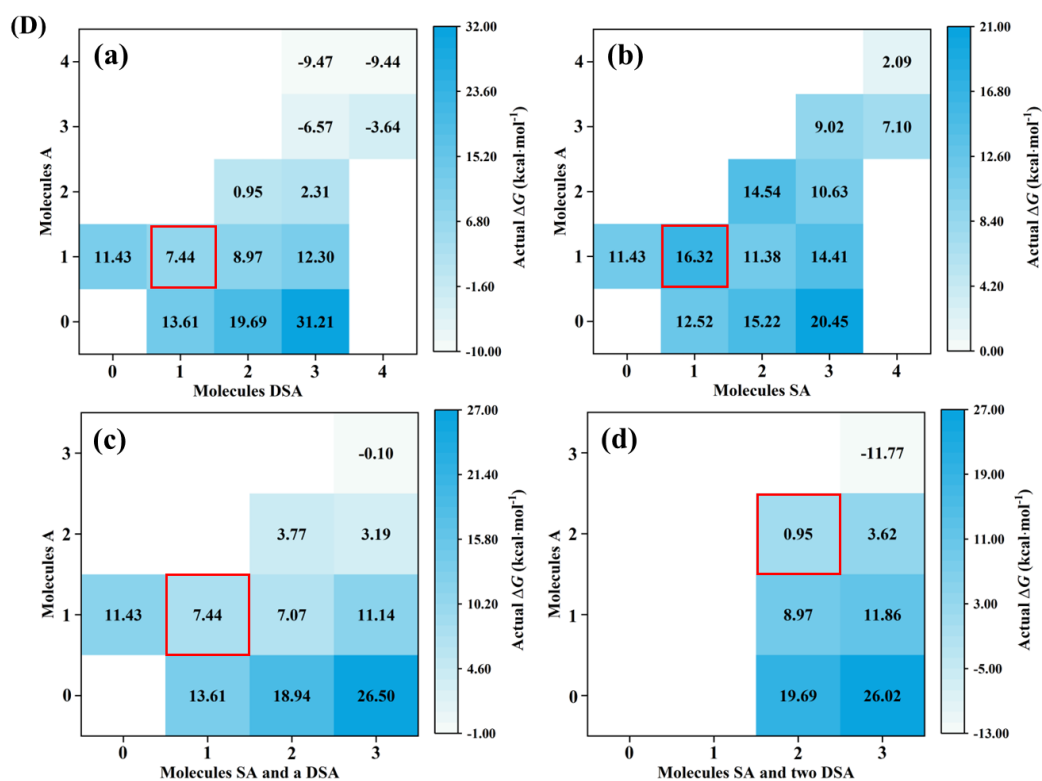

**Figure S13** A typical actual  $\Delta G$  surface at 238.15 K.  $[\text{SA}]$  is the concentration of sulfuric acid monomers,  $[\text{A}]$  the concentration of ammonia monomers and  $[\text{DSA}]$  is disulfuric acid

## Part 6 Collision coefficients and evaporation coefficients

The collision rate coefficient  $\beta_{i,j}$  between clusters  $i$  and  $j$  was calculated using hard-sphere collision theory (Chapman and Cowling, 1990) in Eq. (S5).

$$\beta_{i,j} = \pi(r_i + r_j)^2 \sqrt{\frac{8k_B T}{\pi\mu}} \quad (\text{S5})$$

Where  $r_i$  is the radius of cluster  $i$ , defined as the sum of distance between the two farthest atom in cluster  $i$  and half of the van der Waals radii of these two atoms and given by Multiwfn\_3.7 software (Lu and Chen, 2012);  $k_B$  is the Boltzmann constant;  $T$  is the temperature and  $\mu = m_i \cdot m_j / (m_i + m_j)$  is the reduced mass.

The evaporation coefficient  $\gamma_{(i+j) \rightarrow i}$  was computed using the corresponding collision coefficients and the Gibbs free energies of formation of the clusters as show in Eq. (S6).

$$\gamma_{(i+j) \rightarrow i} = \beta_{i,j} \frac{P_{ref}}{k_B T} \exp\left(\frac{\Delta G_{i+j} - \Delta G_i - \Delta G_j}{k_B T}\right) \quad (\text{S6})$$

Where  $P_{ref}$  is the reference pressure (1 atm in current study) at which the Gibbs free energies have been calculated, and  $\Delta G_{i+j}$  is the Gibbs free energy of formation of cluster  $i+j$  from monomers  $i$  and  $j$ .

## Reference

- Chapman, S., and Cowling, T. G.: The mathematical theory of non-uniform gases: an account of the kinetic theory of viscosity, thermal conduction and diffusion in gases, Cambridge university press, 1990.
- Lu, T., and Chen, F.: Multiwfn: A multifunctional wavefunction analyzer, J. Comput. Chem., 33, 580-592, <https://doi.org/10.1002/jcc.22885>, 2012.

### Part 7 Enhancement factor R

To figure out how DSA affects the kinetic clustering process, the potential influence of DSA to the SA-A-based particle formation was estimated by calculating the enhancement factor  $R$  in Eq (5).

$$R = \frac{J_{\text{SA-A-DSA}}}{J_{\text{SA-A}}} = \frac{J([\text{SA}] = x, [\text{A}] = y, [\text{DSA}] = z)}{J([\text{SA}] = x, [\text{A}] = y, [\text{DSA}] = 0)} \quad (5)$$

where  $J_{\text{SA-A-DSA}}$  and  $J_{\text{SA-A}}$  are represented the formation rate of SA-A-DSA and SA-A nucleating system, respectively.  $x$ ,  $y$  and  $z$  are the atmospheric concentration of SA, A and DSA.



**Table S10** Collision coefficients ( $\beta$ ,  $\text{cm}^3\cdot\text{s}^{-1}$ ) for each cluster in the present study

| Collisions                                 | $\beta$ , $\text{cm}^3\cdot\text{s}^{-1}$ |                        |                        |                        |                        |
|--------------------------------------------|-------------------------------------------|------------------------|------------------------|------------------------|------------------------|
|                                            | 298.15 K                                  | 278.15 K               | 258.15 K               | 238.15 K               | 218.15 K               |
| SA + A                                     | $1.65 \times 10^{-10}$                    | $1.54 \times 10^{-10}$ | $1.43 \times 10^{-10}$ | $1.32 \times 10^{-10}$ | $1.20 \times 10^{-10}$ |
| SA + DSA                                   | $7.02 \times 10^{-11}$                    | $6.55 \times 10^{-11}$ | $6.08 \times 10^{-11}$ | $5.61 \times 10^{-11}$ | $5.14 \times 10^{-11}$ |
| DSA + A                                    | $2.15 \times 10^{-10}$                    | $2.00 \times 10^{-10}$ | $1.86 \times 10^{-10}$ | $1.71 \times 10^{-10}$ | $1.57 \times 10^{-10}$ |
| SA + SA                                    | $6.81 \times 10^{-11}$                    | $6.35 \times 10^{-11}$ | $5.90 \times 10^{-11}$ | $5.44 \times 10^{-11}$ | $4.98 \times 10^{-11}$ |
| DSA + DSA                                  | $6.40 \times 10^{-11}$                    | $5.97 \times 10^{-11}$ | $5.54 \times 10^{-11}$ | $5.11 \times 10^{-11}$ | $4.68 \times 10^{-11}$ |
| (SA) <sub>2</sub> + A                      | $3.03 \times 10^{-10}$                    | $2.83 \times 10^{-10}$ | $2.62 \times 10^{-10}$ | $2.42 \times 10^{-10}$ | $2.22 \times 10^{-10}$ |
| SA·A + SA                                  | $8.90 \times 10^{-11}$                    | $8.31 \times 10^{-11}$ | $7.71 \times 10^{-11}$ | $7.11 \times 10^{-11}$ | $6.51 \times 10^{-11}$ |
| (SA) <sub>2</sub> ·A + A                   | $2.81 \times 10^{-10}$                    | $2.62 \times 10^{-10}$ | $2.43 \times 10^{-10}$ | $2.25 \times 10^{-10}$ | $2.06 \times 10^{-10}$ |
| (DSA) <sub>2</sub> + A                     | $3.25 \times 10^{-10}$                    | $3.03 \times 10^{-10}$ | $2.81 \times 10^{-10}$ | $2.59 \times 10^{-10}$ | $2.38 \times 10^{-10}$ |
| DSA·A + DSA                                | $6.95 \times 10^{-11}$                    | $6.48 \times 10^{-11}$ | $6.01 \times 10^{-11}$ | $5.55 \times 10^{-11}$ | $5.08 \times 10^{-11}$ |
| (DSA) <sub>2</sub> ·A + A                  | $3.37 \times 10^{-10}$                    | $3.15 \times 10^{-10}$ | $2.92 \times 10^{-10}$ | $2.70 \times 10^{-10}$ | $2.47 \times 10^{-10}$ |
| (SA) <sub>2</sub> + DSA                    | $8.05 \times 10^{-11}$                    | $7.51 \times 10^{-11}$ | $6.97 \times 10^{-11}$ | $6.43 \times 10^{-11}$ | $5.89 \times 10^{-11}$ |
| SA·DSA + SA                                | $8.62 \times 10^{-11}$                    | $8.04 \times 10^{-11}$ | $7.46 \times 10^{-11}$ | $6.89 \times 10^{-11}$ | $6.31 \times 10^{-11}$ |
| (DSA) <sub>2</sub> + SA                    | $8.65 \times 10^{-11}$                    | $8.07 \times 10^{-11}$ | $7.49 \times 10^{-11}$ | $6.91 \times 10^{-11}$ | $6.33 \times 10^{-11}$ |
| SA·DSA + DSA                               | $7.13 \times 10^{-11}$                    | $6.65 \times 10^{-11}$ | $6.17 \times 10^{-11}$ | $5.69 \times 10^{-11}$ | $5.21 \times 10^{-11}$ |
| (SA) <sub>2</sub> + SA                     | $9.26 \times 10^{-11}$                    | $8.64 \times 10^{-11}$ | $8.02 \times 10^{-11}$ | $7.40 \times 10^{-11}$ | $6.77 \times 10^{-11}$ |
| (DSA) <sub>2</sub> + DSA                   | $6.88 \times 10^{-11}$                    | $6.42 \times 10^{-11}$ | $5.96 \times 10^{-11}$ | $5.50 \times 10^{-11}$ | $5.04 \times 10^{-11}$ |
| SA + (SA) <sub>2</sub> ·A                  | $8.48 \times 10^{-11}$                    | $7.91 \times 10^{-11}$ | $7.34 \times 10^{-11}$ | $6.78 \times 10^{-11}$ | $6.21 \times 10^{-11}$ |
| (SA) <sub>3</sub> + A                      | $3.93 \times 10^{-10}$                    | $3.67 \times 10^{-10}$ | $3.41 \times 10^{-10}$ | $3.14 \times 10^{-10}$ | $2.88 \times 10^{-10}$ |
| (SA) <sub>2</sub> ·(A) <sub>2</sub> + SA   | $9.26 \times 10^{-11}$                    | $8.64 \times 10^{-11}$ | $8.02 \times 10^{-11}$ | $7.40 \times 10^{-11}$ | $6.78 \times 10^{-11}$ |
| (SA) <sub>3</sub> ·A + A                   | $3.13 \times 10^{-10}$                    | $2.92 \times 10^{-10}$ | $2.71 \times 10^{-10}$ | $2.50 \times 10^{-10}$ | $2.29 \times 10^{-10}$ |
| (SA) <sub>3</sub> ·(A) <sub>2</sub> + A    | $4.08 \times 10^{-10}$                    | $3.80 \times 10^{-10}$ | $3.53 \times 10^{-10}$ | $3.26 \times 10^{-10}$ | $2.98 \times 10^{-10}$ |
| (DSA) <sub>2</sub> ·A + DSA                | $7.00 \times 10^{-11}$                    | $6.53 \times 10^{-11}$ | $6.06 \times 10^{-11}$ | $5.59 \times 10^{-11}$ | $5.12 \times 10^{-11}$ |
| (DSA) <sub>3</sub> + A                     | $4.90 \times 10^{-10}$                    | $4.57 \times 10^{-10}$ | $4.24 \times 10^{-10}$ | $3.91 \times 10^{-10}$ | $3.58 \times 10^{-10}$ |
| (DSA) <sub>2</sub> ·(A) <sub>2</sub> + DSA | $7.76 \times 10^{-11}$                    | $7.24 \times 10^{-11}$ | $6.72 \times 10^{-11}$ | $6.20 \times 10^{-11}$ | $5.68 \times 10^{-11}$ |
| (DSA) <sub>3</sub> ·A + A                  | $4.17 \times 10^{-10}$                    | $3.89 \times 10^{-10}$ | $3.61 \times 10^{-10}$ | $3.33 \times 10^{-10}$ | $3.05 \times 10^{-10}$ |
| (DSA) <sub>3</sub> ·(A) <sub>2</sub> + A   | $4.78 \times 10^{-10}$                    | $4.46 \times 10^{-10}$ | $4.14 \times 10^{-10}$ | $3.82 \times 10^{-10}$ | $3.50 \times 10^{-10}$ |
| DSA·A + SA                                 | $7.85 \times 10^{-11}$                    | $7.32 \times 10^{-11}$ | $6.79 \times 10^{-11}$ | $6.27 \times 10^{-11}$ | $5.74 \times 10^{-11}$ |
| SA·A + DSA                                 | $8.60 \times 10^{-11}$                    | $8.02 \times 10^{-11}$ | $7.44 \times 10^{-11}$ | $6.87 \times 10^{-11}$ | $6.29 \times 10^{-11}$ |
| SA·DSA + A                                 | $3.06 \times 10^{-10}$                    | $2.86 \times 10^{-10}$ | $2.65 \times 10^{-10}$ | $2.45 \times 10^{-10}$ | $2.24 \times 10^{-10}$ |
| SA·DSA·A + A                               | $3.03 \times 10^{-10}$                    | $2.83 \times 10^{-10}$ | $2.62 \times 10^{-10}$ | $2.42 \times 10^{-10}$ | $2.22 \times 10^{-10}$ |
| SA·DSA·A + SA                              | $8.43 \times 10^{-11}$                    | $7.87 \times 10^{-11}$ | $7.30 \times 10^{-11}$ | $6.74 \times 10^{-11}$ | $6.17 \times 10^{-11}$ |

|                                    |                        |                        |                        |                        |                        |
|------------------------------------|------------------------|------------------------|------------------------|------------------------|------------------------|
| $(SA)_2 \cdot A + DSA$             | $7.33 \times 10^{-11}$ | $6.84 \times 10^{-11}$ | $6.35 \times 10^{-11}$ | $5.86 \times 10^{-11}$ | $5.36 \times 10^{-11}$ |
| $(SA)_2 \cdot DSA + A$             | $3.80 \times 10^{-10}$ | $3.54 \times 10^{-10}$ | $3.29 \times 10^{-10}$ | $3.03 \times 10^{-10}$ | $2.78 \times 10^{-10}$ |
| $SA \cdot DSA \cdot (A)_2 + SA$    | $8.09 \times 10^{-11}$ | $7.55 \times 10^{-11}$ | $7.00 \times 10^{-11}$ | $6.46 \times 10^{-11}$ | $5.92 \times 10^{-11}$ |
| $(SA)_2 \cdot (A)_2 + DSA$         | $7.83 \times 10^{-11}$ | $7.30 \times 10^{-11}$ | $6.78 \times 10^{-11}$ | $6.25 \times 10^{-11}$ | $5.73 \times 10^{-11}$ |
| $(SA)_2 \cdot DSA \cdot A + A$     | $3.25 \times 10^{-10}$ | $3.03 \times 10^{-10}$ | $2.82 \times 10^{-10}$ | $2.60 \times 10^{-10}$ | $2.38 \times 10^{-10}$ |
| $(SA)_2 \cdot DSA \cdot (A)_2 + A$ | $4.22 \times 10^{-10}$ | $3.93 \times 10^{-10}$ | $3.65 \times 10^{-10}$ | $3.37 \times 10^{-10}$ | $3.08 \times 10^{-10}$ |
| $(DSA)_2 \cdot A + SA$             | $8.88 \times 10^{-11}$ | $8.28 \times 10^{-11}$ | $7.69 \times 10^{-11}$ | $7.09 \times 10^{-11}$ | $6.49 \times 10^{-11}$ |
| $SA \cdot DSA \cdot A + DSA$       | $6.92 \times 10^{-11}$ | $6.46 \times 10^{-11}$ | $5.99 \times 10^{-11}$ | $5.53 \times 10^{-11}$ | $5.06 \times 10^{-11}$ |
| $SA \cdot (DSA)_2 + A$             | $3.31 \times 10^{-10}$ | $3.08 \times 10^{-10}$ | $2.86 \times 10^{-10}$ | $2.64 \times 10^{-10}$ | $2.42 \times 10^{-10}$ |
| $(DSA)_2 \cdot (A)_2 + SA$         | $1.00 \times 10^{-10}$ | $9.34 \times 10^{-11}$ | $8.67 \times 10^{-11}$ | $8.00 \times 10^{-11}$ | $7.33 \times 10^{-11}$ |
| $SA \cdot DSA \cdot (A)_2 + DSA$   | $6.61 \times 10^{-11}$ | $6.17 \times 10^{-11}$ | $5.72 \times 10^{-11}$ | $5.28 \times 10^{-11}$ | $4.84 \times 10^{-11}$ |
| $SA \cdot (DSA)_2 \cdot A + A$     | $4.19 \times 10^{-10}$ | $3.91 \times 10^{-10}$ | $3.63 \times 10^{-10}$ | $3.35 \times 10^{-10}$ | $3.06 \times 10^{-10}$ |
| $SA \cdot (DSA)_2 \cdot (A)_2 + A$ | $3.84 \times 10^{-10}$ | $3.58 \times 10^{-10}$ | $3.32 \times 10^{-10}$ | $3.06 \times 10^{-10}$ | $2.81 \times 10^{-10}$ |

---

**Table S11** Evaporation rates ( $s^{-1}$ ) of the studied clusters at different temperatures of 298.15, 278.15, 258.15, 238.15 and 218.15 K

| Evaporation pathways                                                                 | 298.15 K                                           | 278.15 K                                           | 258.15 K                                           | 238.15 K                                           | 218.15 K                                            |
|--------------------------------------------------------------------------------------|----------------------------------------------------|----------------------------------------------------|----------------------------------------------------|----------------------------------------------------|-----------------------------------------------------|
| $(SA)_2 \rightarrow SA + SA$                                                         | $3.36 \times 10^3$<br>( $2.89 \times 10^3$ )       | $3.81 \times 10^2$<br>( $3.14 \times 10^2$ )       | $3.07 \times 10^1$<br>( $2.46 \times 10^1$ )       | $1.61 \times 10^0$<br>( $1.23 \times 10^0$ )       | $4.91 \times 10^{-2}$<br>( $3.51 \times 10^{-2}$ )  |
| $(SA)_3 \rightarrow (SA)_2 + SA$                                                     | $7.99 \times 10^5$<br>( $1.22 \times 10^6$ )       | $9.55 \times 10^4$<br>( $1.34 \times 10^5$ )       | $8.20 \times 10^3$<br>( $1.05 \times 10^4$ )       | $4.64 \times 10^2$<br>( $5.40 \times 10^2$ )       | $1.54 \times 10^1$<br>( $1.58 \times 10^1$ )        |
| $(SA)_1 \cdot (A)_1 \rightarrow SA + A$                                              | $2.67 \times 10^5$<br>( $4.76 \times 10^4$ )       | $4.19 \times 10^4$<br>( $6.70 \times 10^3$ )       | $4.92 \times 10^3$<br>( $7.09 \times 10^2$ )       | $4.03 \times 10^2$<br>( $5.01 \times 10^1$ )       | $2.08 \times 10^1$<br>( $2.17 \times 10^0$ )        |
| $(SA)_2 \cdot (A)_1 \rightarrow (SA)_1 \cdot (A)_1 + SA$                             | $3.32 \times 10^{-2}$<br>( $1.48 \times 10^0$ )    | $1.08 \times 10^{-3}$<br>( $5.23 \times 10^{-2}$ ) | $2.07 \times 10^{-5}$<br>( $1.12 \times 10^{-3}$ ) | $2.05 \times 10^{-7}$<br>( $3.33 \times 10^{-4}$ ) | $8.64 \times 10^{-10}$<br>( $6.20 \times 10^{-8}$ ) |
| $(SA)_2 \cdot (A)_1 \rightarrow A + (SA)_2$                                          | $3.72 \times 10^0$<br>( $1.60 \times 10^1$ )       | $1.68 \times 10^{-1}$<br>( $7.31 \times 10^{-1}$ ) | $4.69 \times 10^{-3}$<br>( $2.11 \times 10^{-2}$ ) | $7.20 \times 10^{-5}$<br>( $1.25 \times 10^{-5}$ ) | $5.16 \times 10^{-7}$<br>( $2.51 \times 10^{-6}$ )  |
| $(SA)_3 \cdot (A)_1 \rightarrow (SA)_2 \cdot (A)_1 + SA$                             | $1.63 \times 10^4$<br>( $1.85 \times 10^3$ )       | $1.53 \times 10^3$<br>( $1.56 \times 10^2$ )       | $9.93 \times 10^1$<br>( $8.72 \times 10^0$ )       | $4.02 \times 10^0$<br>( $3.00 \times 10^{-1}$ )    | $4.95 \times 10^{-2}$<br>( $5.39 \times 10^{-3}$ )  |
| $(SA)_3 \cdot (A)_1 \rightarrow A + (SA)_3$                                          | $1.07 \times 10^{-1}$<br>( $3.12 \times 10^{-2}$ ) | $3.81 \times 10^{-3}$<br>( $1.09 \times 10^{-3}$ ) | $8.04 \times 10^{-5}$<br>( $2.25 \times 10^{-5}$ ) | $8.84 \times 10^{-7}$<br>( $2.37 \times 10^{-7}$ ) | $2.34 \times 10^{-9}$<br>( $1.19 \times 10^{-9}$ )  |
| $(SA)_2 \cdot (A)_2 \rightarrow (SA)_2 \cdot (A)_1 + A$                              | $2.02 \times 10^5$<br>( $1.37 \times 10^6$ )       | $2.71 \times 10^4$<br>( $2.07 \times 10^5$ )       | $2.65 \times 10^3$<br>( $2.32 \times 10^4$ )       | $1.75 \times 10^2$<br>( $1.80 \times 10^3$ )       | $7.05 \times 10^0$<br>( $8.49 \times 10^1$ )        |
| $(SA)_3 \cdot (A)_2 \rightarrow (SA)_2 \cdot (A)_2 + SA$                             | $1.61 \times 10^{-1}$<br>( $9.75 \times 10^{-2}$ ) | $6.34 \times 10^{-3}$<br>( $3.53 \times 10^{-3}$ ) | $1.51 \times 10^{-4}$<br>( $7.48 \times 10^{-5}$ ) | $1.90 \times 10^{-6}$<br>( $8.44 \times 10^{-7}$ ) | $1.06 \times 10^{-8}$<br>( $4.16 \times 10^{-9}$ )  |
| $(SA)_3 \cdot (A)_2 \rightarrow (SA)_3 \cdot (A)_1 + A$                              | $2.04 \times 10^0$<br>( $7.26 \times 10^1$ )       | $1.14 \times 10^{-1}$<br>( $4.73 \times 10^0$ )    | $4.10 \times 10^{-3}$<br>( $2.02 \times 10^{-1}$ ) | $8.43 \times 10^{-5}$<br>( $5.11 \times 10^{-3}$ ) | $1.55 \times 10^{-6}$<br>( $6.61 \times 10^{-5}$ )  |
| $(SA)_3 \cdot (A)_3 \rightarrow (SA)_3 \cdot (A)_2 + A$                              | $1.49 \times 10^2$                                 | $9.81 \times 10^0$                                 | $4.22 \times 10^{-1}$                              | $1.07 \times 10^{-2}$                              | $1.36 \times 10^{-4}$<br>( $2.93 \times 10^{-4}$ )  |
| $(SA)_1 \cdot (DSA)_1 \rightarrow SA + DSA$                                          | $6.68 \times 10^5$                                 | $8.27 \times 10^4$                                 | $7.35 \times 10^3$                                 | $4.32 \times 10^2$                                 | $1.50 \times 10^1$                                  |
| $(SA)_2 \cdot (DSA)_1 \rightarrow (SA)_1 \cdot (DSA)_1 + SA$                         | $5.71 \times 10^7$                                 | $8.04 \times 10^6$                                 | $8.34 \times 10^5$                                 | $5.91 \times 10^4$                                 | $2.57 \times 10^3$                                  |
| $(SA)_2 \cdot (DSA)_1 \rightarrow DSA + (SA)_2$                                      | $1.03 \times 10^{10}$                              | $1.58 \times 10^9$                                 | $1.81 \times 10^8$                                 | $1.43 \times 10^7$                                 | $7.11 \times 10^5$                                  |
| $(DSA)_1 \cdot (A)_1 \rightarrow DSA + A$                                            | $2.96 \times 10^{-2}$                              | $1.17 \times 10^{-3}$                              | $2.82 \times 10^{-5}$                              | $3.64 \times 10^{-7}$                              | $2.13 \times 10^{-9}$                               |
| $(SA)_1 \cdot (DSA)_1 \cdot (A)_1 \rightarrow SA + (DSA)_1 \cdot (A)_1$              | $3.67 \times 10^1$                                 | $2.48 \times 10^0$                                 | $1.10 \times 10^{-1}$                              | $2.85 \times 10^{-3}$                              | $3.77 \times 10^{-5}$                               |
| $(SA)_1 \cdot (DSA)_1 \cdot (A)_1 \rightarrow A + (SA)_1 \cdot (DSA)_1$              | $2.08 \times 10^{-6}$                              | $4.49 \times 10^{-8}$                              | $5.37 \times 10^{-10}$                             | $3.07 \times 10^{-12}$                             | $6.83 \times 10^{-15}$                              |
| $(SA)_1 \cdot (DSA)_1 \cdot (A)_1 \rightarrow DSA + (SA)_1 \cdot (A)_1$              | $3.41 \times 10^{-6}$                              | $5.83 \times 10^{-8}$                              | $5.28 \times 10^{-10}$                             | $2.17 \times 10^{-12}$                             | $3.23 \times 10^{-15}$                              |
| $(SA)_2 \cdot (DSA)_1 \cdot (A)_1 \rightarrow A + (SA)_2 \cdot (DSA)_1$              | $3.61 \times 10^{-9}$                              | $6.26 \times 10^{-11}$                             | $5.77 \times 10^{-13}$                             | $2.42 \times 10^{-15}$                             | $3.70 \times 10^{-18}$                              |
| $(SA)_2 \cdot (DSA)_1 \cdot (A)_1 \rightarrow DSA + (SA)_2 \cdot (A)_1$              | $7.26 \times 10^0$                                 | $4.28 \times 10^{-1}$                              | $1.62 \times 10^{-2}$                              | $3.49 \times 10^{-4}$                              | $3.71 \times 10^{-6}$                               |
| $(SA)_1 \cdot (DSA)_1 \cdot (A)_2 \rightarrow A + (SA)_1 \cdot (DSA)_1 \cdot (A)_1$  | $1.18 \times 10^1$                                 | $5.29 \times 10^{-1}$                              | $1.47 \times 10^{-2}$                              | $2.25 \times 10^{-4}$                              | $1.60 \times 10^{-6}$                               |
| $(SA)_2 \cdot (DSA)_1 \cdot (A)_2 \rightarrow SA + (SA)_1 \cdot (DSA)_1 \cdot (A)_2$ | $3.89 \times 10^1$                                 | $2.29 \times 10^0$                                 | $8.64 \times 10^{-2}$                              | $1.87 \times 10^{-3}$                              | $1.99 \times 10^{-5}$                               |
| $(SA)_2 \cdot (DSA)_1 \cdot (A)_2 \rightarrow A + (SA)_2 \cdot (DSA)_1 \cdot (A)_1$  | $6.55 \times 10^{-3}$                              | $1.54 \times 10^{-4}$                              | $2.02 \times 10^{-6}$                              | $1.28 \times 10^{-8}$                              | $3.24 \times 10^{-11}$                              |
| $(SA)_2 \cdot (DSA)_1 \cdot (A)_2 \rightarrow DSA + (SA)_2 \cdot (A)_2$              | $2.17 \times 10^{-7}$                              | $2.25 \times 10^{-9}$                              | $1.14 \times 10^{-11}$                             | $2.36 \times 10^{-14}$                             | $1.57 \times 10^{-17}$                              |
| $(SA)_2 \cdot (DSA)_1 \cdot (A)_3 \rightarrow A + (SA)_2 \cdot (DSA)_1 \cdot (A)_2$  | $3.08 \times 10^0$                                 | $2.14 \times 10^{-1}$                              | $9.81 \times 10^{-3}$                              | $2.68 \times 10^{-4}$                              | $3.78 \times 10^{-6}$                               |
| $(DSA)_2 \rightarrow DSA + DSA$                                                      | $3.56 \times 10^5$                                 | $4.18 \times 10^4$                                 | $3.50 \times 10^3$                                 | $1.93 \times 10^2$                                 | $6.20 \times 10^0$                                  |
| $(SA)_1 \cdot (DSA)_2 \rightarrow SA + (DSA)_2$                                      | $3.3. \times 10^6$                                 | $5.05 \times 10^5$                                 | $5.72 \times 10^4$                                 | $4.46 \times 10^3$                                 | $5.62 \times 10^1$                                  |

|                                                                                       |                        |                        |                        |                        |                        |
|---------------------------------------------------------------------------------------|------------------------|------------------------|------------------------|------------------------|------------------------|
| $(SA)_1 \cdot (DSA)_2 \rightarrow DSA + (SA)_1 \cdot (DSA)_1$                         | $1.59 \times 10^6$     | $2.31 \times 10^5$     | $2.46 \times 10^4$     | $1.80 \times 10^3$     | $2.10 \times 10^1$     |
| $(DSA)_2 \cdot (A)_1 \rightarrow A + (DSA)_2$                                         | $2.52 \times 10^{-5}$  | $5.47 \times 10^{-7}$  | $6.55 \times 10^{-9}$  | $3.73 \times 10^{-11}$ | $8.24 \times 10^{-14}$ |
| $(DSA)_2 \cdot (A)_1 \rightarrow DSA + (DSA)_1 \cdot (A)_1$                           | $2.18 \times 10^2$     | $1.40 \times 10^1$     | $5.83 \times 10^{-1}$  | $1.41 \times 10^{-2}$  | $1.72 \times 10^{-4}$  |
| $(SA)_1 \cdot (DSA)_2 \cdot (A)_1 \rightarrow SA + (DSA)_2 \cdot (A)_1$               | $2.70 \times 10^3$     | $2.24 \times 10^2$     | $1.26 \times 10^1$     | $4.32 \times 10^{-1}$  | $2.04 \times 10^{-3}$  |
| $(SA)_1 \cdot (DSA)_2 \cdot (A)_1 \rightarrow A + (SA)_1 \cdot (DSA)_2$               | $3.09 \times 10^{-8}$  | $3.64 \times 10^{-10}$ | $2.16 \times 10^{-12}$ | $5.41 \times 10^{-15}$ | $4.47 \times 10^{-18}$ |
| $(SA)_1 \cdot (DSA)_2 \cdot (A)_1 \rightarrow DSA + (SA)_1 \cdot (DSA)_1 \cdot (A)_1$ | $1.41 \times 10^4$     | $1.11 \times 10^3$     | $5.89 \times 10^1$     | $1.89 \times 10^0$     | $8.19 \times 10^{-3}$  |
| $(DSA)_2 \cdot (A)_2 \rightarrow A + (DSA)_2 \cdot (A)_1$                             | $2.13 \times 10^{-3}$  | $6.68 \times 10^{-5}$  | $1.22 \times 10^{-6}$  | $1.15 \times 10^{-8}$  | $4.57 \times 10^{-11}$ |
| $(SA)_1 \cdot (DSA)_2 \cdot (A)_2 \rightarrow SA + (DSA)_2 \cdot (A)_2$               | $1.51 \times 10^4$     | $1.25 \times 10^3$     | $7.09 \times 10^1$     | $2.45 \times 10^0$     | $4.58 \times 10^{-2}$  |
| $(SA)_1 \cdot (DSA)_2 \cdot (A)_2 \rightarrow A + (SA)_1 \cdot (DSA)_2 \cdot (A)_1$   | $2.01 \times 10^{-3}$  | $6.02 \times 10^{-5}$  | $1.05 \times 10^{-6}$  | $9.21 \times 10^{-9}$  | $3.41 \times 10^{-11}$ |
| $(SA)_1 \cdot (DSA)_2 \cdot (A)_2 \rightarrow DSA + (SA)_1 \cdot (DSA)_1 \cdot (A)_2$ | $1.17 \times 10^1$     | $6.51 \times 10^{-1}$  | $2.30 \times 10^{-2}$  | $4.60 \times 10^{-4}$  | $4.45 \times 10^{-6}$  |
| $(SA)_1 \cdot (DSA)_2 \cdot (A)_3 \rightarrow A + (SA)_1 \cdot (DSA)_2 \cdot (A)_2$   | $5.72 \times 10^{-9}$  | $8.55 \times 10^{-11}$ | $6.65 \times 10^{-13}$ | $2.28 \times 10^{-15}$ | $2.76 \times 10^{-18}$ |
| $(DSA)_3 \rightarrow (DSA)_2 + DSA$                                                   | $3.48 \times 10^9$     | $8.08 \times 10^8$     | $1.49 \times 10^8$     | $2.05 \times 10^7$     | $1.94 \times 10^6$     |
| $(DSA)_3 \cdot (A)_1 \rightarrow A + (DSA)_3$                                         | $3.97 \times 10^{-11}$ | $2.74 \times 10^{-13}$ | $8.73 \times 10^{-16}$ | $1.06 \times 10^{-18}$ | $3.78 \times 10^{-22}$ |
| $(DSA)_3 \cdot (A)_1 \rightarrow DSA + (DSA)_2 \cdot (A)_1$                           | $3.50 \times 10^3$     | $2.58 \times 10^2$     | $1.26 \times 10^1$     | $3.67 \times 10^{-1}$  | $5.59 \times 10^{-3}$  |
| $(DSA)_3 \cdot (A)_2 \rightarrow A + (DSA)_3 \cdot (A)_1$                             | $7.22 \times 10^{-5}$  | $1.94 \times 10^{-6}$  | $2.95 \times 10^{-8}$  | $2.22 \times 10^{-10}$ | $6.77 \times 10^{-13}$ |
| $(DSA)_3 \cdot (A)_2 \rightarrow DSA + (DSA)_2 \cdot (A)_2$                           | $1.78 \times 10^2$     | $1.16 \times 10^1$     | $4.90 \times 10^{-1}$  | $1.21 \times 10^{-2}$  | $1.49 \times 10^{-4}$  |
| $(DSA)_3 \cdot (A)_3 \rightarrow A + (DSA)_3 \cdot (A)_2$                             | $8.19 \times 10^{-4}$  | $2.23 \times 10^{-5}$  | $3.46 \times 10^{-7}$  | $2.67 \times 10^{-9}$  | $8.48 \times 10^{-12}$ |

---

\*The values in parentheses were taken from (Liu, J., Liu, L., Rong, H., and Zhang, X.: The potential mechanism of atmospheric new particle formation involving amino acids with multiple functional groups, *Phys. Chem. Chem. Phys.*, 23, 10184-10195, 10.1039/D0CP06472F, 2021.)

**Table S12** Total evaporation coefficients ( $\sum\gamma, \text{s}^{-1}$ ) for each cluster in the present study

| Clusters                                 | $\sum\gamma, \text{s}^{-1}$ |                        |                        |                        |                        |
|------------------------------------------|-----------------------------|------------------------|------------------------|------------------------|------------------------|
|                                          | 298.15 K                    | 278.15 K               | 258.15 K               | 238.15 K               | 218.15 K               |
| SA·A                                     | $2.67 \times 10^5$          | $4.19 \times 10^4$     | $4.92 \times 10^3$     | $4.03 \times 10^2$     | $2.08 \times 10^1$     |
| SA·DSA                                   | $6.68 \times 10^5$          | $8.27 \times 10^4$     | $7.35 \times 10^3$     | $4.32 \times 10^2$     | $1.50 \times 10^1$     |
| A·DSA                                    | $2.96 \times 10^{-2}$       | $1.17 \times 10^{-3}$  | $2.82 \times 10^{-5}$  | $3.64 \times 10^{-7}$  | $2.13 \times 10^{-9}$  |
| (SA) <sub>2</sub>                        | $3.36 \times 10^3$          | $3.81 \times 10^2$     | $3.07 \times 10^1$     | $1.61 \times 10^0$     | $4.91 \times 10^{-2}$  |
| (DSA) <sub>2</sub>                       | $3.56 \times 10^5$          | $4.18 \times 10^4$     | $3.50 \times 10^3$     | $1.93 \times 10^2$     | $6.20 \times 10^0$     |
| (SA) <sub>2</sub> ·A                     | $3.75\text{E} \times 10^0$  | $1.69 \times 10^{-1}$  | $4.71 \times 10^{-3}$  | $7.22 \times 10^{-5}$  | $5.17 \times 10^{-7}$  |
| (SA) <sub>2</sub> ·(A) <sub>2</sub>      | $2.02 \times 10^5$          | $2.71 \times 10^4$     | $2.65 \times 10^3$     | $1.75 \times 10^2$     | $7.05 \times 10^0$     |
| A·(DSA) <sub>2</sub>                     | $2.18 \times 10^2$          | $1.40 \times 10^1$     | $5.83 \times 10^{-1}$  | $1.41 \times 10^{-2}$  | $1.72 \times 10^{-4}$  |
| (A) <sub>2</sub> ·(DSA) <sub>2</sub>     | $2.13 \times 10^{-3}$       | $6.68 \times 10^{-5}$  | $1.22 \times 10^{-6}$  | $1.15 \times 10^{-8}$  | $4.57 \times 10^{-11}$ |
| (SA) <sub>2</sub> ·DSA                   | $1.03 \times 10^{10}$       | $1.59 \times 10^9$     | $1.82 \times 10^8$     | $1.44 \times 10^7$     | $7.14 \times 10^5$     |
| SA·(DSA) <sub>2</sub>                    | $4.90 \times 10^6$          | $7.36 \times 10^5$     | $8.18 \times 10^4$     | $6.26 \times 10^3$     | $7.72 \times 10^1$     |
| (SA) <sub>3</sub>                        | $7.99 \times 10^5$          | $9.55 \times 10^4$     | $8.20 \times 10^3$     | $4.64 \times 10^2$     | $1.54 \times 10^1$     |
| (DSA) <sub>3</sub>                       | $3.48 \times 10^9$          | $8.08 \times 10^8$     | $1.49 \times 10^8$     | $2.05 \times 10^7$     | $1.94 \times 10^6$     |
| (SA) <sub>3</sub> ·A                     | $1.63 \times 10^4$          | $1.53 \times 10^3$     | $9.93 \times 10^1$     | $4.02 \times 10^0$     | $4.95 \times 10^{-2}$  |
| (SA) <sub>3</sub> ·(A) <sub>2</sub>      | $2.20 \times 10^0$          | $1.21 \times 10^{-1}$  | $4.25 \times 10^{-3}$  | $8.62 \times 10^{-5}$  | $1.56 \times 10^{-6}$  |
| (SA) <sub>3</sub> ·(A) <sub>3</sub>      | $1.49 \times 10^2$          | $9.81 \times 10^0$     | $4.22 \times 10^{-1}$  | $1.07 \times 10^{-2}$  | $1.36 \times 10^{-4}$  |
| A·(DSA) <sub>3</sub>                     | $3.50 \times 10^3$          | $2.58 \times 10^2$     | $1.26 \times 10^1$     | $3.67 \times 10^{-1}$  | $5.59 \times 10^{-3}$  |
| (A) <sub>2</sub> ·(DSA) <sub>3</sub>     | $1.45 \times 10^3$          | $9.80 \times 10^1$     | $4.28 \times 10^0$     | $1.08 \times 10^{-1}$  | $1.41 \times 10^{-3}$  |
| (A) <sub>3</sub> ·(DSA) <sub>3</sub>     | $2.70 \times 10^{-3}$       | $7.59 \times 10^{-5}$  | $1.22 \times 10^{-6}$  | $9.82 \times 10^{-9}$  | $3.24 \times 10^{-11}$ |
| SA·A·DSA                                 | $3.67 \times 10^1$          | $2.48 \times 10^0$     | $1.10 \times 10^{-1}$  | $2.85 \times 10^{-3}$  | $3.77 \times 10^{-5}$  |
| SA·(A) <sub>2</sub> ·DSA                 | $1.18 \times 10^1$          | $5.29 \times 10^{-1}$  | $1.47 \times 10^{-2}$  | $2.25 \times 10^{-4}$  | $1.60 \times 10^{-6}$  |
| SA <sub>2</sub> ·A·DSA                   | $7.84 \times 10^4$          | $8.84 \times 10^3$     | $7.06 \times 10^2$     | $3.67 \times 10^1$     | $1.10 \times 10^0$     |
| (SA) <sub>2</sub> ·(A) <sub>2</sub> ·DSA | $3.89 \times 10^1$          | $2.29 \times 10^0$     | $8.64 \times 10^{-2}$  | $1.87 \times 10^{-3}$  | $1.99 \times 10^{-5}$  |
| (SA) <sub>2</sub> ·(A) <sub>3</sub> ·DSA | $4.23 \times 10^8$          | $1.27 \times 10^8$     | $3.16 \times 10^7$     | $6.14 \times 10^6$     | $8.75 \times 10^5$     |
| SA·A·(DSA) <sub>2</sub>                  | $1.68 \times 10^4$          | $1.34 \times 10^3$     | $7.14 \times 10^1$     | $2.32 \times 10^0$     | $1.02 \times 10^{-2}$  |
| SA·(A) <sub>2</sub> ·(DSA) <sub>2</sub>  | $1.51 \times 10^4$          | $1.26 \times 10^3$     | $7.09 \times 10^1$     | $2.46 \times 10^0$     | $4.58 \times 10^{-2}$  |
| SA·(A) <sub>3</sub> ·(DSA) <sub>2</sub>  | $5.72 \times 10^{-9}$       | $8.55 \times 10^{-11}$ | $6.65 \times 10^{-13}$ | $2.28 \times 10^{-15}$ | $2.76 \times 10^{-18}$ |

**Table S13** The formation rate  $J$  of DSA at the conditions of  $T = 218.15$  K,  $[\text{SA}] = 10^6\text{-}10^8$  molecules $\cdot\text{cm}^{-3}$ ,  $[\text{A}] = 10^7\text{-}10^{11}$  molecules $\cdot\text{cm}^{-3}$ , and  $[\text{DSA}] = 0, 10^4\text{-}10^7$  molecules $\cdot\text{cm}^{-3}$ . SA, A and DSA represent sulfuric acid, ammonia and disulfuric acid, respectively

| [SA]   | [A]       | [DSA] = 0             | [DSA] = $10^4$        | [DSA] = $10^5$        | [DSA] = $10^6$        | [DSA] = $10^7$     |
|--------|-----------|-----------------------|-----------------------|-----------------------|-----------------------|--------------------|
| $10^6$ | $10^7$    | $3.66 \times 10^{-5}$ | $4.05 \times 10^{-5}$ | $4.63 \times 10^{-4}$ | $1.04 \times 10^{-1}$ | $4.14 \times 10^1$ |
| $10^6$ | $10^8$    | $5.33 \times 10^{-3}$ | $6.30 \times 10^{-3}$ | $1.10 \times 10^{-1}$ | $2.70 \times 10^1$    | $3.28 \times 10^3$ |
| $10^6$ | $10^9$    | $6.50 \times 10^{-2}$ | $2.01 \times 10^{-1}$ | $2.47 \times 10^1$    | $3.14 \times 10^3$    | $4.21 \times 10^4$ |
| $10^6$ | $10^{10}$ | $1.52 \times 10^{-1}$ | $2.72 \times 10^1$    | $3.34 \times 10^3$    | $4.53 \times 10^4$    | $2.11 \times 10^5$ |
| $10^6$ | $10^{11}$ | $1.21 \times 10^0$    | $5.26 \times 10^3$    | $7.12 \times 10^4$    | $3.32 \times 10^5$    | $1.17 \times 10^6$ |
| $10^7$ | $10^7$    | $3.20 \times 10^{-1}$ | $3.22 \times 10^{-1}$ | $3.57 \times 10^{-1}$ | $2.96 \times 10^0$    | $3.69 \times 10^2$ |
| $10^7$ | $10^8$    | $4.44 \times 10^1$    | $4.47 \times 10^1$    | $5.13 \times 10^1$    | $5.12 \times 10^2$    | $2.74 \times 10^4$ |
| $10^7$ | $10^9$    | $4.79 \times 10^2$    | $4.97 \times 10^2$    | $1.06 \times 10^3$    | $2.76 \times 10^4$    | $3.74 \times 10^5$ |
| $10^7$ | $10^{10}$ | $1.02 \times 10^3$    | $1.77 \times 10^3$    | $2.99 \times 10^4$    | $3.96 \times 10^5$    | $2.02 \times 10^6$ |
| $10^7$ | $10^{11}$ | $6.17 \times 10^3$    | $5.11 \times 10^4$    | $5.82 \times 10^5$    | $3.11 \times 10^6$    | $1.15 \times 10^7$ |
| $10^8$ | $10^7$    | $1.78 \times 10^3$    | $1.78 \times 10^3$    | $1.80 \times 10^3$    | $1.97 \times 10^3$    | $5.01 \times 10^3$ |
| $10^8$ | $10^8$    | $1.05 \times 10^5$    | $1.05 \times 10^5$    | $1.06 \times 10^5$    | $1.11 \times 10^5$    | $2.18 \times 10^5$ |
| $10^8$ | $10^9$    | $5.60 \times 10^5$    | $5.60 \times 10^5$    | $5.64 \times 10^5$    | $6.41 \times 10^5$    | $2.03 \times 10^6$ |
| $10^8$ | $10^{10}$ | $9.10 \times 10^5$    | $9.17 \times 10^5$    | $1.00 \times 10^6$    | $2.33 \times 10^6$    | $1.38 \times 10^7$ |
| $10^8$ | $10^{11}$ | $2.96 \times 10^6$    | $3.12 \times 10^6$    | $4.69 \times 10^6$    | $1.87 \times 10^7$    | $9.41 \times 10^7$ |

**Table S14** The formation rate  $J$  of DSA at the conditions of  $T = 238.15$  K,  $[SA] = 10^6$ - $10^8$  molecules·cm<sup>-3</sup>,  $[A] = 10^7$ - $10^{11}$  molecules·cm<sup>-3</sup>, and  $[DSA] = 0, 10^4$ - $10^7$  molecules·cm<sup>-3</sup>. SA, A and DSA represent sulfuric acid, ammonia and disulfuric acid, respectively

| [SA]                   | [A]                    | [DSA] = 0               | [DSA] = 10 <sup>4</sup> | [DSA] = 10 <sup>5</sup> | [DSA] = 10 <sup>6</sup> | [DSA] = 10 <sup>7</sup> |
|------------------------|------------------------|-------------------------|-------------------------|-------------------------|-------------------------|-------------------------|
| [SA] = 10 <sup>6</sup> | [A] = 10 <sup>7</sup>  | 1.14 × 10 <sup>-8</sup> | 1.71 × 10 <sup>-6</sup> | 1.93 × 10 <sup>-4</sup> | 4.09 × 10 <sup>-2</sup> | 1.75E+01                |
| [SA] = 10 <sup>6</sup> | [A] = 10 <sup>8</sup>  | 4.51 × 10 <sup>-6</sup> | 6.10 × 10 <sup>-4</sup> | 8.08 × 10 <sup>-2</sup> | 2.22 × 10 <sup>1</sup>  | 2.72 × 10 <sup>3</sup>  |
| [SA] = 10 <sup>6</sup> | [A] = 10 <sup>9</sup>  | 5.48 × 10 <sup>-4</sup> | 1.03 × 10 <sup>-1</sup> | 2.32 × 10 <sup>1</sup>  | 2.92 × 10 <sup>3</sup>  | 3.74 × 10 <sup>4</sup>  |
| [SA] = 10 <sup>6</sup> | [A] = 10 <sup>10</sup> | 2.02 × 10 <sup>-2</sup> | 2.62 × 10 <sup>1</sup>  | 3.18 × 10 <sup>3</sup>  | 4.12 × 10 <sup>4</sup>  | 1.89 × 10 <sup>5</sup>  |
| [SA] = 10 <sup>6</sup> | [A] = 10 <sup>11</sup> | 1.18 × 10 <sup>-1</sup> | 3.64 × 10 <sup>3</sup>  | 4.62 × 10 <sup>4</sup>  | 2.11 × 10 <sup>5</sup>  | 7.40 × 10 <sup>5</sup>  |
| [SA] = 10 <sup>7</sup> | [A] = 10 <sup>7</sup>  | 1.26 × 10 <sup>-4</sup> | 2.68 × 10 <sup>-4</sup> | 1.18 × 10 <sup>-2</sup> | 1.23 × 10 <sup>0</sup>  | 1.78 × 10 <sup>2</sup>  |
| [SA] = 10 <sup>7</sup> | [A] = 10 <sup>8</sup>  | 4.58 × 10 <sup>-2</sup> | 8.85 × 10 <sup>-2</sup> | 3.57 × 10 <sup>0</sup>  | 3.51 × 10 <sup>2</sup>  | 2.25 × 10 <sup>4</sup>  |
| [SA] = 10 <sup>7</sup> | [A] = 10 <sup>9</sup>  | 5.22 × 10 <sup>0</sup>  | 1.07 × 10 <sup>1</sup>  | 4.39 × 10 <sup>2</sup>  | 2.45 × 10 <sup>4</sup>  | 3.31 × 10 <sup>5</sup>  |
| [SA] = 10 <sup>7</sup> | [A] = 10 <sup>10</sup> | 1.70 × 10 <sup>2</sup>  | 7.43 × 10 <sup>2</sup>  | 2.76 × 10 <sup>4</sup>  | 3.64 × 10 <sup>5</sup>  | 1.82 × 10 <sup>6</sup>  |
| [SA] = 10 <sup>7</sup> | [A] = 10 <sup>11</sup> | 8.26 × 10 <sup>2</sup>  | 3.19 × 10 <sup>4</sup>  | 4.06 × 10 <sup>5</sup>  | 2.03 × 10 <sup>6</sup>  | 7.31 × 10 <sup>6</sup>  |
| [SA] = 10 <sup>8</sup> | [A] = 10 <sup>7</sup>  | 1.74 × 10 <sup>0</sup>  | 1.80 × 10 <sup>0</sup>  | 2.52 × 10 <sup>0</sup>  | 2.36 × 10 <sup>1</sup>  | 1.26 × 10 <sup>3</sup>  |
| [SA] = 10 <sup>8</sup> | [A] = 10 <sup>8</sup>  | 4.46 × 10 <sup>2</sup>  | 4.58 × 10 <sup>2</sup>  | 5.87 × 10 <sup>2</sup>  | 3.68 × 10 <sup>3</sup>  | 9.84 × 10 <sup>4</sup>  |
| [SA] = 10 <sup>8</sup> | [A] = 10 <sup>9</sup>  | 2.83 × 10 <sup>4</sup>  | 2.89 × 10 <sup>4</sup>  | 3.49 × 10 <sup>4</sup>  | 1.39 × 10 <sup>5</sup>  | 1.57 × 10 <sup>6</sup>  |
| [SA] = 10 <sup>8</sup> | [A] = 10 <sup>10</sup> | 3.29 × 10 <sup>5</sup>  | 3.36 × 10 <sup>5</sup>  | 4.32 × 10 <sup>5</sup>  | 1.86 × 10 <sup>6</sup>  | 1.27 × 10 <sup>7</sup>  |
| [SA] = 10 <sup>8</sup> | [A] = 10 <sup>11</sup> | 8.15 × 10 <sup>5</sup>  | 9.07 × 10 <sup>5</sup>  | 2.30 × 10 <sup>6</sup>  | 1.39 × 10 <sup>7</sup>  | 6.46 × 10 <sup>7</sup>  |

**Table S15** The formation rate  $J$  of DSA at the conditions of  $T = 258.15$  K,  $[SA] = 10^6$ - $10^8$  molecules·cm<sup>-3</sup>,  $[A] = 10^7$ - $10^{11}$  molecules·cm<sup>-3</sup>, and  $[DSA] = 0, 10^4$ - $10^7$  molecules·cm<sup>-3</sup>. SA, A and DSA represent sulfuric acid, ammonia and disulfuric acid, respectively

| [SA]                   | [A]                    | [DSA] = 0                | [DSA] = 10 <sup>4</sup> | [DSA] = 10 <sup>5</sup> | [DSA] = 10 <sup>6</sup> | [DSA] = 10 <sup>7</sup> |
|------------------------|------------------------|--------------------------|-------------------------|-------------------------|-------------------------|-------------------------|
| [SA] = 10 <sup>6</sup> | [A] = 10 <sup>7</sup>  | 5.58 × 10 <sup>-13</sup> | 2.64 × 10 <sup>-8</sup> | 1.18 × 10 <sup>-5</sup> | 1.00 × 10 <sup>-2</sup> | 7.42 × 10 <sup>0</sup>  |
| [SA] = 10 <sup>6</sup> | [A] = 10 <sup>8</sup>  | 5.34 × 10 <sup>-10</sup> | 2.72 × 10 <sup>-5</sup> | 1.20 × 10 <sup>-2</sup> | 7.96 × 10 <sup>0</sup>  | 1.36 × 10 <sup>3</sup>  |
| [SA] = 10 <sup>6</sup> | [A] = 10 <sup>9</sup>  | 3.75 × 10 <sup>-7</sup>  | 3.05 × 10 <sup>-2</sup> | 1.21 × 10 <sup>1</sup>  | 1.90 × 10 <sup>3</sup>  | 2.79 × 10 <sup>4</sup>  |
| [SA] = 10 <sup>6</sup> | [A] = 10 <sup>10</sup> | 9.02 × 10 <sup>-5</sup>  | 2.28 × 10 <sup>1</sup>  | 2.91 × 10 <sup>3</sup>  | 3.82 × 10 <sup>4</sup>  | 1.76 × 10 <sup>5</sup>  |
| [SA] = 10 <sup>6</sup> | [A] = 10 <sup>11</sup> | 6.67 × 10 <sup>-3</sup>  | 3.37 × 10 <sup>3</sup>  | 4.21 × 10 <sup>4</sup>  | 1.92 × 10 <sup>5</sup>  | 6.73 × 10 <sup>5</sup>  |
| [SA] = 10 <sup>7</sup> | [A] = 10 <sup>7</sup>  | 6.50 × 10 <sup>-9</sup>  | 1.32 × 10 <sup>-6</sup> | 2.01 × 10 <sup>-4</sup> | 8.73 × 10 <sup>-2</sup> | 5.76 × 10 <sup>1</sup>  |
| [SA] = 10 <sup>7</sup> | [A] = 10 <sup>8</sup>  | 6.16 × 10 <sup>-6</sup>  | 1.34 × 10 <sup>-3</sup> | 2.01 × 10 <sup>-1</sup> | 6.89 × 10 <sup>1</sup>  | 1.09 × 10 <sup>4</sup>  |
| [SA] = 10 <sup>7</sup> | [A] = 10 <sup>9</sup>  | 4.01 × 10 <sup>-3</sup>  | 1.28 × 10 <sup>0</sup>  | 1.66 × 10 <sup>2</sup>  | 1.58 × 10 <sup>4</sup>  | 2.49 × 10 <sup>5</sup>  |
| [SA] = 10 <sup>7</sup> | [A] = 10 <sup>10</sup> | 8.50 × 10 <sup>-1</sup>  | 4.07 × 10 <sup>2</sup>  | 2.44 × 10 <sup>4</sup>  | 3.35 × 10 <sup>5</sup>  | 1.69 × 10 <sup>6</sup>  |
| [SA] = 10 <sup>7</sup> | [A] = 10 <sup>11</sup> | 5.81 × 10 <sup>1</sup>   | 2.86 × 10 <sup>4</sup>  | 3.70 × 10 <sup>5</sup>  | 1.84 × 10 <sup>6</sup>  | 6.65 × 10 <sup>6</sup>  |
| [SA] = 10 <sup>8</sup> | [A] = 10 <sup>7</sup>  | 1.53 × 10 <sup>-4</sup>  | 2.04 × 10 <sup>-4</sup> | 4.33 × 10 <sup>-3</sup> | 6.03 × 10 <sup>-1</sup> | 2.02 × 10 <sup>2</sup>  |
| [SA] = 10 <sup>8</sup> | [A] = 10 <sup>8</sup>  | 1.30 × 10 <sup>-1</sup>  | 1.88 × 10 <sup>-1</sup> | 4.22 × 10 <sup>0</sup>  | 4.63 × 10 <sup>2</sup>  | 4.08 × 10 <sup>4</sup>  |
| [SA] = 10 <sup>8</sup> | [A] = 10 <sup>9</sup>  | 5.22 × 10 <sup>1</sup>   | 9.63 × 10 <sup>1</sup>  | 1.99 × 10 <sup>3</sup>  | 7.84 × 10 <sup>4</sup>  | 1.23 × 10 <sup>6</sup>  |
| [SA] = 10 <sup>8</sup> | [A] = 10 <sup>10</sup> | 6.14 × 10 <sup>3</sup>   | 1.13 × 10 <sup>4</sup>  | 1.16 × 10 <sup>5</sup>  | 1.55 × 10 <sup>6</sup>  | 1.16 × 10 <sup>7</sup>  |
| [SA] = 10 <sup>8</sup> | [A] = 10 <sup>11</sup> | 1.81 × 10 <sup>5</sup>   | 3.03 × 10 <sup>5</sup>  | 1.81 × 10 <sup>6</sup>  | 1.27 × 10 <sup>7</sup>  | 5.87 × 10 <sup>7</sup>  |



**Table S16** The formation rate  $J$  of DSA at the conditions of  $T = 278.15$  K,  $[SA] = 10^6$ - $10^8$  molecules $\cdot$ cm $^{-3}$ ,  $[A] = 10^7$ - $10^{11}$  molecules $\cdot$ cm $^{-3}$ , and  $[DSA] = 0, 10^4$ - $10^7$  molecules $\cdot$ cm $^{-3}$ . SA, A and DSA represent sulfuric acid, ammonia and disulfuric acid, respectively

| [SA]          | [A]             | [DSA] = 0              | [DSA] = $10^4$        | [DSA] = $10^5$        | [DSA] = $10^6$        | [DSA] = $10^7$     |
|---------------|-----------------|------------------------|-----------------------|-----------------------|-----------------------|--------------------|
| $[SA] = 10^6$ | $[A] = 10^7$    | $8.97 \times 10^{-19}$ | $7.12 \times 10^{-9}$ | $7.07 \times 10^{-6}$ | $6.91 \times 10^{-3}$ | $5.49 \times 10^0$ |
| $[SA] = 10^6$ | $[A] = 10^8$    | $8.97 \times 10^{-16}$ | $7.10 \times 10^{-6}$ | $6.91 \times 10^{-3}$ | $5.49 \times 10^0$    | $1.15 \times 10^3$ |
| $[SA] = 10^6$ | $[A] = 10^9$    | $8.96 \times 10^{-13}$ | $6.94 \times 10^{-3}$ | $5.50 \times 10^0$    | $1.15 \times 10^3$    | $1.88 \times 10^4$ |
| $[SA] = 10^6$ | $[A] = 10^{10}$ | $8.81 \times 10^{-10}$ | $5.61 \times 10^0$    | $1.17 \times 10^3$    | $1.94 \times 10^4$    | $1.01 \times 10^5$ |
| $[SA] = 10^6$ | $[A] = 10^{11}$ | $7.59 \times 10^{-7}$  | $1.34 \times 10^3$    | $2.38 \times 10^4$    | $1.37 \times 10^5$    | $5.61 \times 10^5$ |
| $[SA] = 10^7$ | $[A] = 10^7$    | $9.09 \times 10^{-15}$ | $5.60 \times 10^{-8}$ | $5.39 \times 10^{-5}$ | $5.25 \times 10^{-2}$ | $4.17 \times 10^1$ |
| $[SA] = 10^7$ | $[A] = 10^8$    | $9.09 \times 10^{-12}$ | $5.59 \times 10^{-5}$ | $5.27 \times 10^{-2}$ | $4.18 \times 10^1$    | $8.98 \times 10^3$ |
| $[SA] = 10^7$ | $[A] = 10^9$    | $9.07 \times 10^{-9}$  | $5.46 \times 10^{-2}$ | $4.20 \times 10^1$    | $9.00 \times 10^3$    | $1.67 \times 10^5$ |
| $[SA] = 10^7$ | $[A] = 10^{10}$ | $8.89 \times 10^{-6}$  | $4.41 \times 10^1$    | $9.18 \times 10^3$    | $1.72 \times 10^5$    | $9.70 \times 10^5$ |
| $[SA] = 10^7$ | $[A] = 10^{11}$ | $7.36 \times 10^{-3}$  | $1.08 \times 10^4$    | $2.12 \times 10^5$    | $1.32 \times 10^6$    | $5.54 \times 10^6$ |
| $[SA] = 10^8$ | $[A] = 10^7$    | $1.03 \times 10^{-10}$ | $2.22 \times 10^{-7}$ | $1.64 \times 10^{-4}$ | $1.55 \times 10^{-1}$ | $1.23 \times 10^2$ |
| $[SA] = 10^8$ | $[A] = 10^8$    | $1.03 \times 10^{-7}$  | $2.21 \times 10^{-4}$ | $1.60 \times 10^{-1}$ | $1.23 \times 10^2$    | $2.81 \times 10^4$ |
| $[SA] = 10^8$ | $[A] = 10^9$    | $1.02 \times 10^{-4}$  | $2.17 \times 10^{-1}$ | $1.28 \times 10^2$    | $2.83 \times 10^4$    | $7.74 \times 10^5$ |
| $[SA] = 10^8$ | $[A] = 10^{10}$ | $9.58 \times 10^{-2}$  | $1.77 \times 10^2$    | $3.01 \times 10^4$    | $8.04 \times 10^5$    | $6.91 \times 10^6$ |
| $[SA] = 10^8$ | $[A] = 10^{11}$ | $5.85 \times 10^1$     | $4.98 \times 10^4$    | $1.06 \times 10^6$    | $9.42 \times 10^6$    | $4.90 \times 10^7$ |

**Table S17** The formation rate  $J$  of DSA at the conditions of  $T = 298.15$  K,  $[SA] = 10^6$ - $10^8$  molecules $\cdot$ cm $^{-3}$ ,  $[A] = 10^7$ - $10^{11}$  molecules $\cdot$ cm $^{-3}$ , and  $[DSA] = 0, 10^4$ - $10^7$  molecules $\cdot$ cm $^{-3}$ . SA, A and DSA represent sulfuric acid, ammonia and disulfuric acid, respectively

| [SA]   | [A]       | [DSA] = 0              | [DSA] = $10^4$         | [DSA] = $10^5$        | [DSA] = $10^6$        | [DSA] = $10^7$        |
|--------|-----------|------------------------|------------------------|-----------------------|-----------------------|-----------------------|
| $10^6$ | $10^7$    | $2.62 \times 10^{-24}$ | $5.25 \times 10^{-11}$ | $5.25 \times 10^{-8}$ | $5.24 \times 10^{-5}$ | $5.15 \times 10^{-2}$ |
| $10^6$ | $10^8$    | $2.62 \times 10^{-21}$ | $5.25 \times 10^{-8}$  | $5.24 \times 10^{-5}$ | $5.15 \times 10^{-2}$ | $4.33 \times 10^1$    |
| $10^6$ | $10^9$    | $2.62 \times 10^{-18}$ | $5.25 \times 10^{-5}$  | $5.16 \times 10^{-2}$ | $4.33 \times 10^1$    | $7.91 \times 10^3$    |
| $10^6$ | $10^{10}$ | $2.62 \times 10^{-15}$ | $5.17 \times 10^{-2}$  | $4.34 \times 10^1$    | $7.91 \times 10^3$    | $7.92 \times 10^4$    |
| $10^6$ | $10^{11}$ | $2.62 \times 10^{-12}$ | $4.44 \times 10^1$     | $7.98 \times 10^3$    | $7.95 \times 10^4$    | $3.33 \times 10^5$    |
| $10^7$ | $10^7$    | $2.62 \times 10^{-20}$ | $4.08 \times 10^{-10}$ | $4.07 \times 10^{-7}$ | $4.06 \times 10^{-4}$ | $3.99 \times 10^{-1}$ |
| $10^7$ | $10^8$    | $2.62 \times 10^{-17}$ | $4.08 \times 10^{-7}$  | $4.06 \times 10^{-4}$ | $3.99 \times 10^{-1}$ | $3.34 \times 10^2$    |
| $10^7$ | $10^9$    | $2.62 \times 10^{-14}$ | $4.07 \times 10^{-4}$  | $3.99 \times 10^{-1}$ | $3.34 \times 10^2$    | $6.63 \times 10^4$    |
| $10^7$ | $10^{10}$ | $2.62 \times 10^{-11}$ | $4.02 \times 10^{-1}$  | $3.35 \times 10^2$    | $6.64 \times 10^4$    | $7.55 \times 10^5$    |
| $10^7$ | $10^{11}$ | $2.62 \times 10^{-8}$  | $3.43 \times 10^2$     | $6.69 \times 10^4$    | $7.58 \times 10^5$    | $3.28 \times 10^6$    |
| $10^8$ | $10^7$    | $2.64 \times 10^{-16}$ | $1.29 \times 10^{-9}$  | $1.25 \times 10^{-6}$ | $1.25 \times 10^{-3}$ | $1.22 \times 10^0$    |
| $10^8$ | $10^8$    | $2.64 \times 10^{-13}$ | $1.29 \times 10^{-6}$  | $1.25 \times 10^3$    | $1.22 \times 10^0$    | $1.02 \times 10^3$    |
| $10^8$ | $10^9$    | $2.64 \times 10^{-10}$ | $1.28 \times 10^{-3}$  | $1.23 \times 10^0$    | $1.02 \times 10^3$    | $2.45 \times 10^5$    |
| $10^8$ | $10^{10}$ | $2.64 \times 10^{-7}$  | $1.26 \times 10^0$     | $1.02 \times 10^3$    | $2.45 \times 10^5$    | $5.06 \times 10^6$    |
| $10^8$ | $10^{11}$ | $2.63 \times 10^{-4}$  | $1.07 \times 10^3$     | $2.47 \times 10^5$    | $5.08 \times 10^6$    | $2.89 \times 10^7$    |

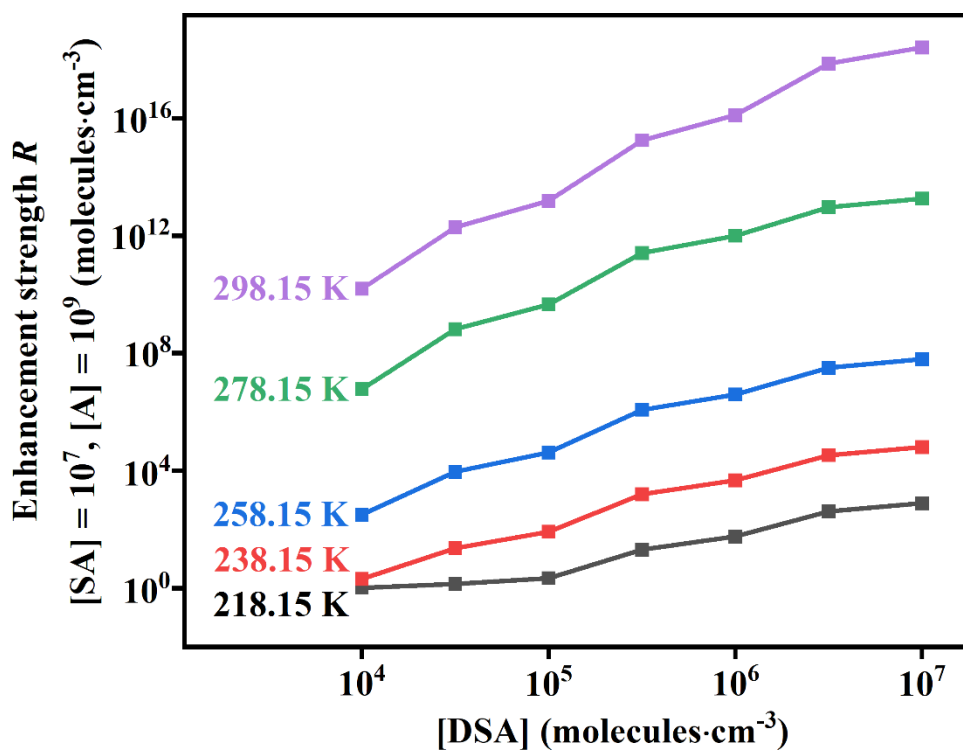

**Figure S14** The enhancement strength  $R$  of DSA as a function of  $[DSA]$  from  $10^4$  to  $10^7$  molecules·cm<sup>-3</sup> under different temperatures (218.15, 238.15, 258.15, 278.15 and 298.15 K) where  $[SA] = 10^7$  molecules·cm<sup>-3</sup> and  $[A] = 10^9$  molecules·cm<sup>-3</sup>

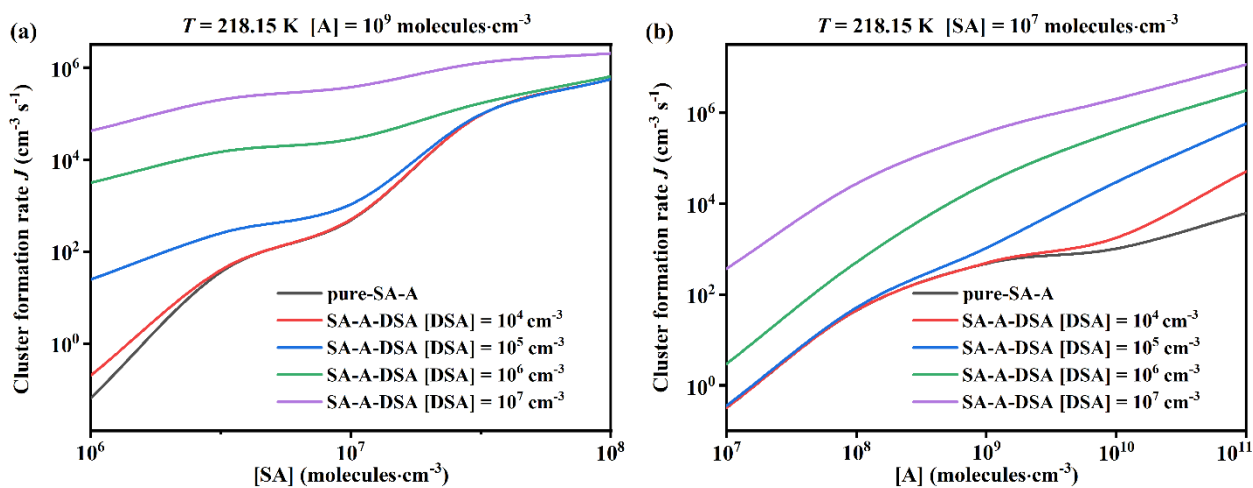

**Figure S15** Simulated cluster formation rates  $J$  ( $\text{cm}^{-3} \text{s}^{-1}$ ) as a function of (a)  $[\text{SA}]$ , (b)  $[\text{A}]$ , with different concentrations of disulfuric acid  $[\text{DSA}]$  of  $10^4$  (red),  $10^5$  (blue),  $10^6$  (green),  $10^7$  (purple) and 0 molecules· $\text{cm}^{-3}$  (black, pure-SA-A), at  $T = 218.15 \text{ K}$

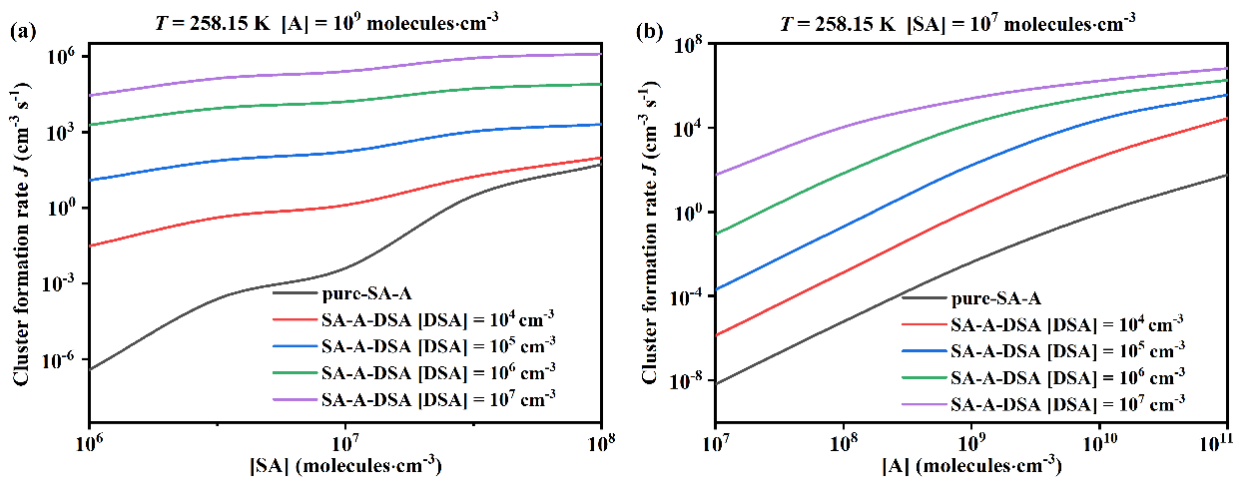

1

2 **Figure S16** Simulated cluster formation rates  $J$  ( $\text{cm}^3 \text{s}^{-1}$ ) as a function of (a)  $[\text{SA}]$ , (b)  $[\text{A}]$ , with different  
 3 concentrations of disulfuric acid  $[\text{DSA}]$  of  $10^4$  (red),  $10^5$  (blue),  $10^6$  (green),  $10^7$  (purple) and 0 molecules· $\text{cm}^{-3}$   
 4 (black, pure-SA-A), at  $T = 258.15 \text{ K}$

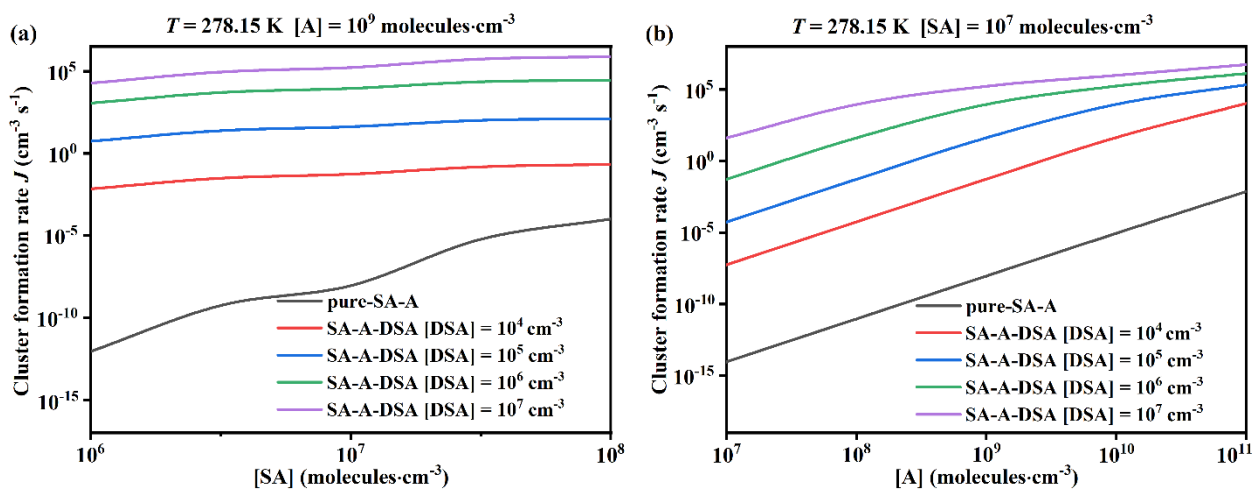

1

2 **Figure S17** Simulated cluster formation rates  $J$  ( $\text{cm}^{-3} \text{s}^{-1}$ ) as a function of (a)  $[\text{SA}]$ , (b)  $[\text{A}]$ , with different  
 3 concentrations of disulfuric acid  $[\text{DSA}]$  of  $10^4$  (red),  $10^5$  (blue),  $10^6$  (green),  $10^7$  (purple) and 0 molecules  $\cdot \text{cm}^{-3}$   
 4 (black, pure-SA-A), at  $T = 278.15 \text{ K}$

5

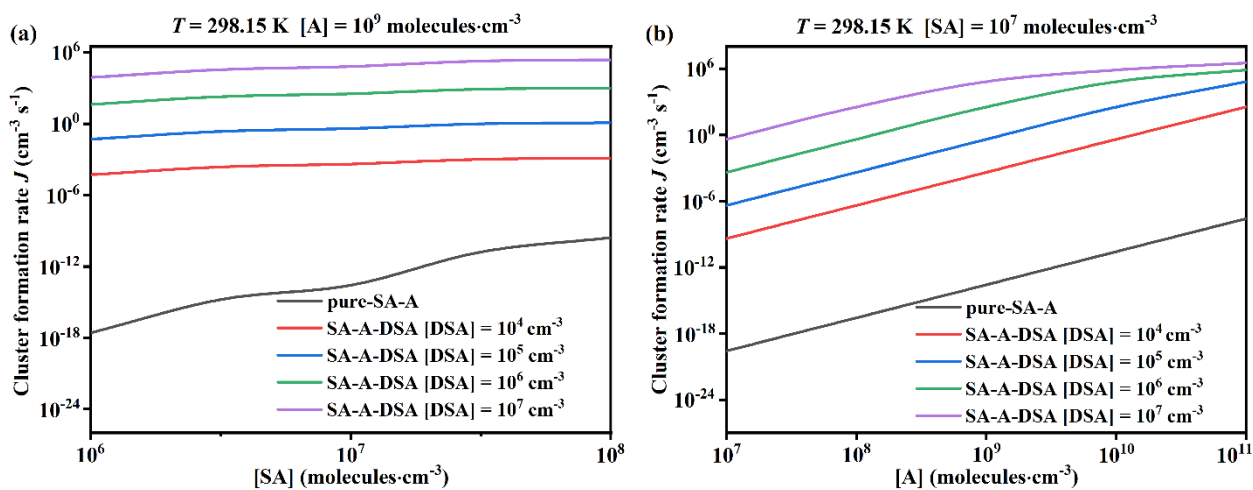

1

2 **Figure S18** Simulated cluster formation rates  $J$  ( $\text{cm}^{-3} \text{s}^{-1}$ ) as a function of (a)  $[\text{SA}]$ , (b)  $[\text{A}]$ , with different  
 3 concentrations of disulfuric acid  $[\text{DSA}]$  of  $10^4$  (red),  $10^5$  (blue),  $10^6$  (green),  $10^7$  (purple) and 0  $\text{molecules}\cdot\text{cm}^{-3}$   
 4 (black, pure-SA-A), at  $T = 298.15 \text{ K}$

5

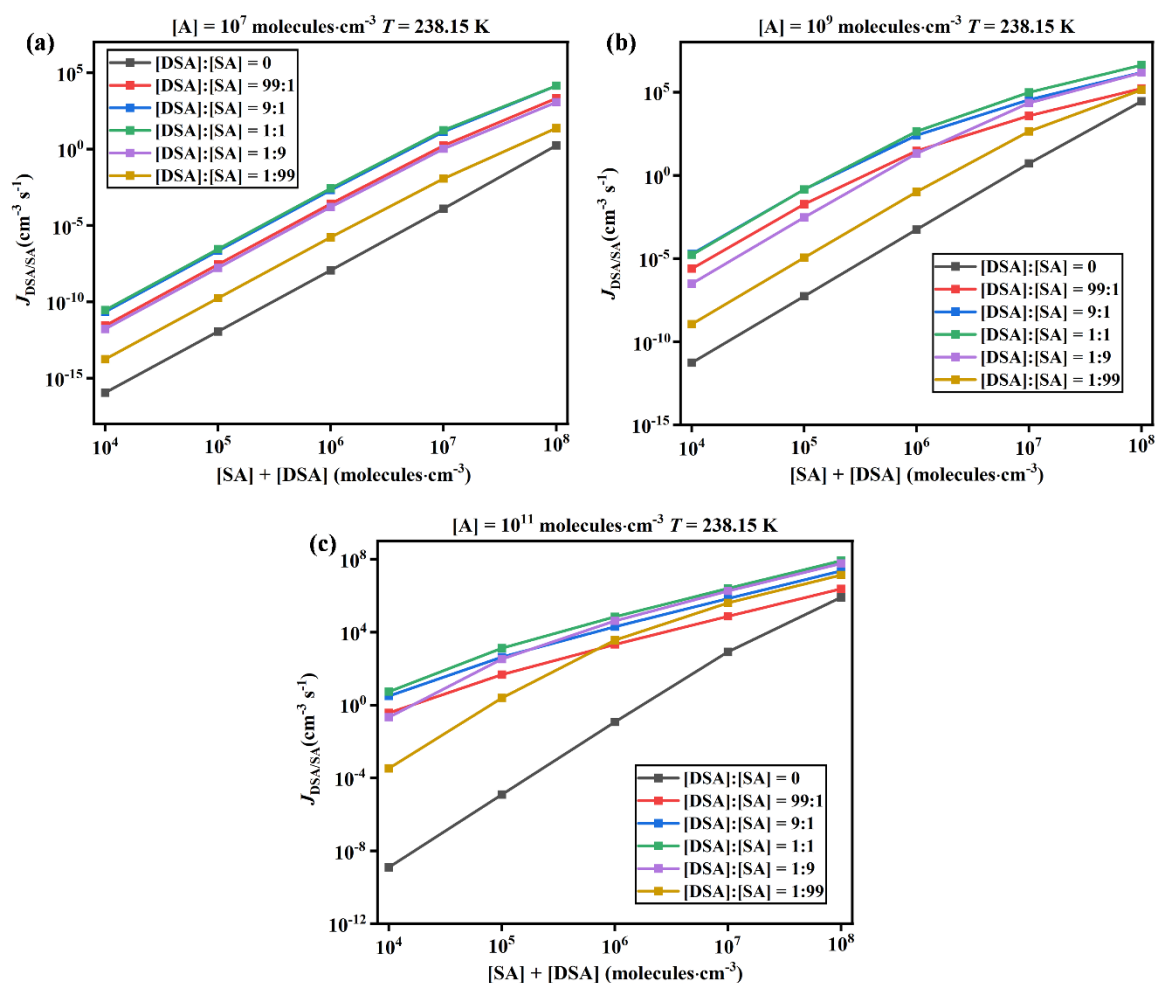

1

2 **Figure S19** Particle formation rates ( $J$ ,  $\text{cm}^{-3}\cdot\text{s}^{-1}$ ) with varying ratios of [DSA]:[SA] at 238.15 K under different  
 3 A concentrations ((a)  $10^7$   $\text{molecules}\cdot\text{cm}^{-3}$ , (b)  $10^9$   $\text{molecules}\cdot\text{cm}^{-3}$ , (c)  $10^{11}$   $\text{molecules}\cdot\text{cm}^{-3}$ ). [DSA] + [SA] =  $10^4$ -  
 4  $10^8$   $\text{molecules}\cdot\text{cm}^{-3}$

5

6 As shown in Figure S19(a), at lower atmospheric concentration of A ( $10^7$   $\text{molecules}\cdot\text{cm}^{-3}$ ), the formation  
 7 rate  $J_{\text{DSA/SA}}$  at 1% substitution ([DSA]:[SA] = 1:99) was higher than that at unsubstituted condition ([DSA]:[SA]  
 8 = 0:100). Similarly,  $J_{\text{DSA/SA}}$  at 10% substitution ([DSA]:[SA] = 1:9) was higher than that at 1% substitution.  
 9 Moreover,  $J_{\text{DSA/SA}}$  at 50% substitution ([DSA]:[SA] = 1:1) reach a maximum value ( $1.41 \times 10^4$   $\text{cm}^{-3}\cdot\text{s}^{-1}$ ), which  
 10 is larger by 4-5 orders of magnitude than the value at unsubstituted condition. These results at lower  
 11 atmospheric concentration of A show that the enhancement strength of DSA on the particle formation rate of  
 12 SA-A-based clusters increases with the increasing of the percentage of substitution.

13 At medium ( $10^9$   $\text{molecules}\cdot\text{cm}^{-3}$ ) and higher ( $10^{11}$   $\text{molecules}\cdot\text{cm}^{-3}$ ) atmospheric concentration of A,  $J_{\text{DSA/SA}}$   
 14 at 50% substitution ([DSA]:[SA] = 1:1) reaches a maximum value. As compared with  $J_{\text{DSA/SA}}$  at unsubstituted  
 15 condition, the value of  $J_{\text{DSA/SA}}$  at 50% substitution ([DSA]:[SA] = 1:1) enhanced by 10 and 11 orders of  
 16 magnitude, respectively. However, as the percentage of substitution (> 50%) increases, the value of  $J_{\text{DSA/SA}}$  at  
 17 medium and higher [A] decreases. This may be due to the fact that in the pure A-DSA nucleation system, large  
 18 stable clusters  $(\text{A})_3\cdot(\text{DSA})_3$  can only be formed by mutual collisions of  $\text{A}\cdot\text{DSA}$  clusters. So, DSA has the same  
 19 “acid” molecular properties as SA in the SA-A-DSA ternary nucleation system. We predicted that DSA is a  
 20 relatively stronger nucleation precursor than SA.

21



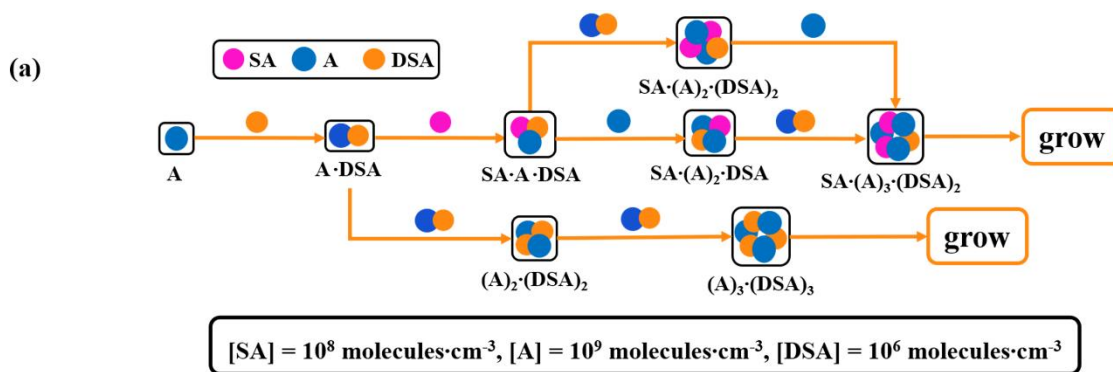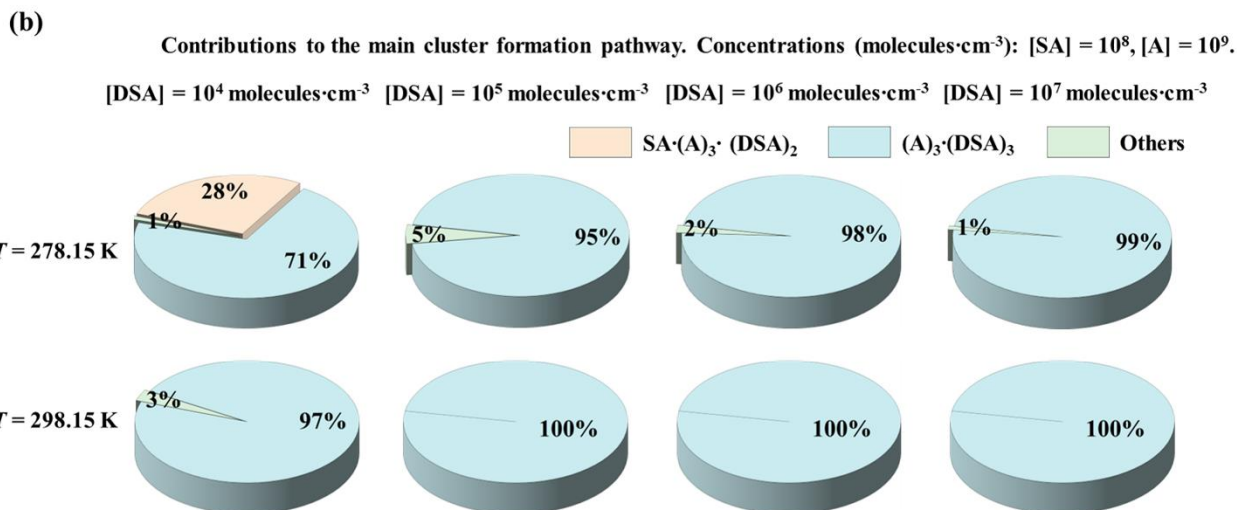

1  
2  
3  
4  
5  
6  
7

**Figure S20** (a) The main pathways of clusters growing out of the research system under the conditions where 278.15 K, and 298.15 K, [SA] =  $10^8$  molecules·cm<sup>-3</sup>, [A] =  $10^9$  molecules·cm<sup>-3</sup>, and [DSA] =  $10^6$  molecules·cm<sup>-3</sup>; (b) The contribution of different concentrations of DSA to the main cluster formation pathway at 278.15 K, and 298.15 K is shown in the pie charts.

Contributions to the main cluster formation pathway. Concentrations (molecules·cm<sup>-3</sup>): [DSA] = 10<sup>6</sup>, [A] = 10<sup>9</sup>.

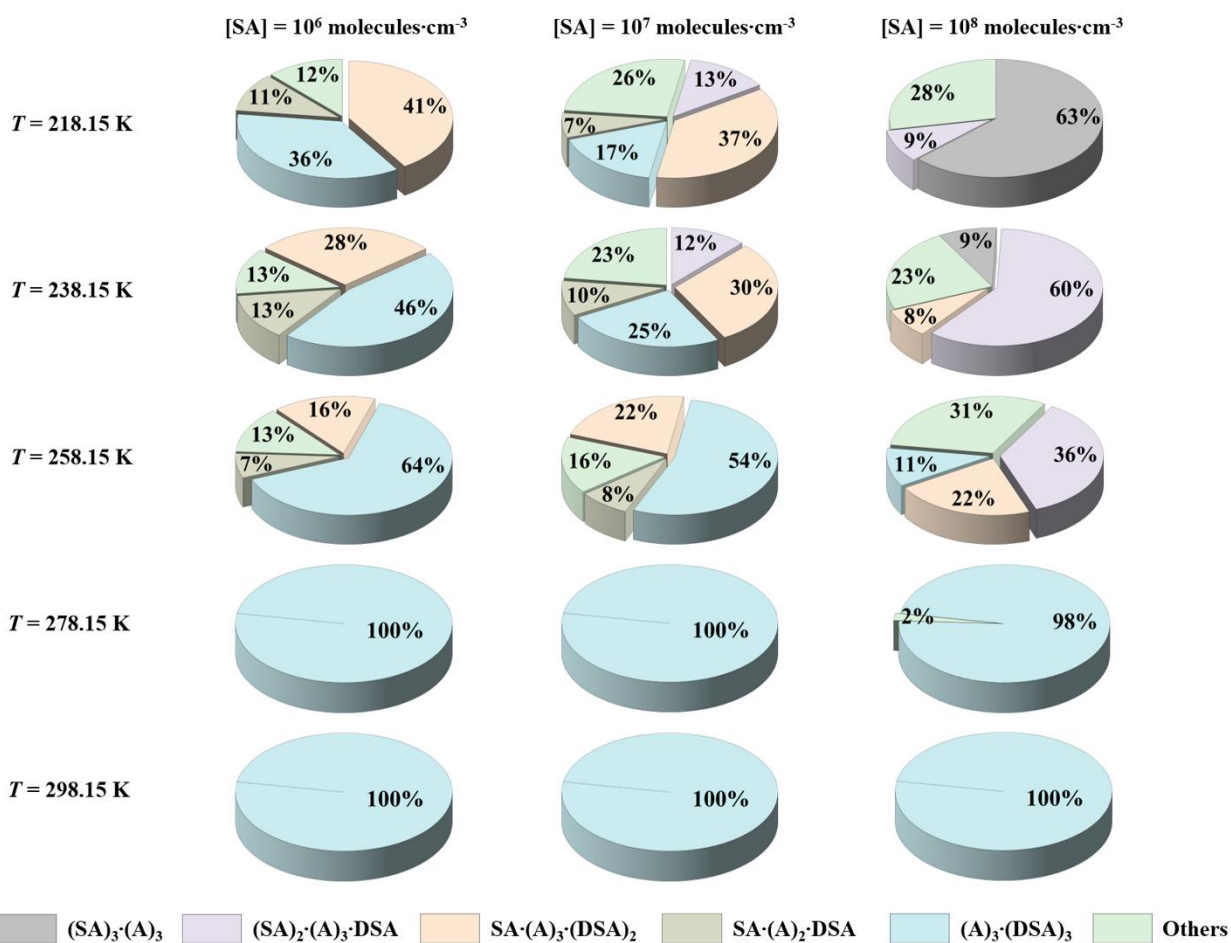

1

2

3

4

5

**Figure S21** The contribution of different concentrations of SA to the major cluster formation pathways at different temperatures (218.15 K, 238.15 K, 258.15 K, 278.15 K, and 298.15 K) and at [DSA] = 10<sup>6</sup> molecules·cm<sup>-3</sup>, [A] = 10<sup>9</sup> molecules·cm<sup>-3</sup> is shown in the pie charts.

Contributions to the main cluster formation pathway. Concentrations (molecules·cm<sup>-3</sup>): [DSA] = 10<sup>6</sup>, [SA] = 10<sup>8</sup>.

[A] = 10<sup>7</sup> molecules·cm<sup>-3</sup> [A] = 10<sup>8</sup> molecules·cm<sup>-3</sup> [A] = 10<sup>9</sup> molecules·cm<sup>-3</sup> [A] = 10<sup>10</sup> molecules·cm<sup>-3</sup> [A] = 10<sup>11</sup> molecules·cm<sup>-3</sup>

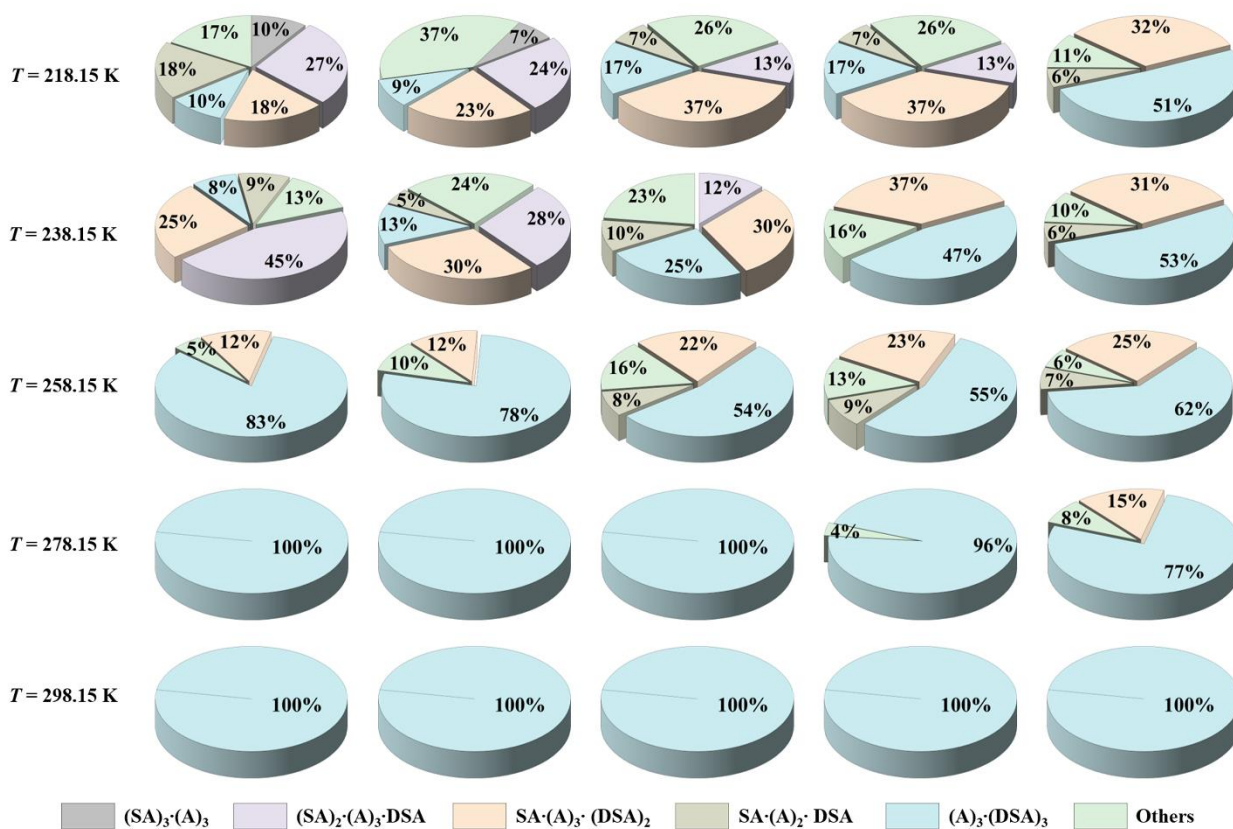

1  
2  
3  
4  
5

**Figure S22** The contribution of different concentrations of A to the major cluster formation pathways at different temperatures (218.15 K, 238.15 K, 258.15 K, 278.15 K, and 298.15 K) and at [DSA] = 10<sup>6</sup> molecules·cm<sup>-3</sup>, [SA] = 10<sup>8</sup> molecules·cm<sup>-3</sup> is shown in the pie charts.

1 **Table S18** Cartesian coordinates of all molecules and clusters in the studied system.

2 **SA:**

| Atoms | X           | Y           | Z           |
|-------|-------------|-------------|-------------|
| S     | -0.00000100 | -0.00000100 | -0.15756700 |
| O     | 0.67306500  | 0.67306500  | -0.81983600 |
| O     | -0.67307500 | -0.67307500 | -0.81979800 |
| O     | 1.01736800  | 1.01736800  | 0.84358200  |
| O     | -1.01735800 | -1.01735800 | 0.84357500  |
| H     | 1.70169100  | 1.70169100  | 1.07043800  |
| H     | -1.70167800 | -1.70167800 | 1.07045700  |

3

4 **A:**

| Atoms | X           | Y           | Z           |
|-------|-------------|-------------|-------------|
| N     | 0.00000000  | 0.11911400  | 0.00000000  |
| H     | -0.93235000 | -0.27807200 | 0.00000000  |
| H     | 0.46617500  | -0.27786300 | 0.80753900  |
| H     | 0.46617500  | -0.27786300 | -0.80753900 |

5

6 **DSA:**

| Atoms | X           | Y           | Z           |
|-------|-------------|-------------|-------------|
| S     | -1.43510900 | -0.13598100 | 0.03492700  |
| O     | -2.38705700 | -0.43102000 | 1.02932100  |
| O     | -1.24778700 | -0.89230600 | -1.14721200 |
| O     | -1.54051800 | 1.38764200  | -0.28976900 |
| S     | 1.38684600  | 0.12449200  | 0.06491400  |
| O     | 1.11188700  | 1.05840000  | -0.97277300 |
| O     | 1.64540800  | -1.25084900 | -0.64070300 |
| O     | 2.34997600  | 0.33819800  | 1.07741600  |
| O     | 0.01087600  | -0.15789900 | 0.86275800  |
| H     | -0.84560200 | 1.61939600  | -0.93204600 |
| H     | 2.07552800  | -1.85290200 | -0.01771400 |

7

8 **(SA)<sub>1</sub>(A)<sub>1</sub>:**

| Atoms | X           | Y           | Z           |
|-------|-------------|-------------|-------------|
| S     | -0.59732600 | -0.11330300 | 0.09028200  |
| O     | 0.11386900  | -0.09250800 | 1.33053100  |
| O     | -1.77725300 | -0.88882800 | -0.09102500 |
| O     | 0.38323700  | -0.42810500 | -1.05987100 |
| O     | -0.97903500 | 1.41306500  | -0.18279600 |
| H     | 1.35885500  | -0.23109000 | -0.73760300 |
| H     | -1.72492000 | 1.42300400  | -0.79399800 |
| N     | 2.71575100  | 0.04051200  | -0.05360200 |
| H     | 3.15679600  | 0.92252300  | -0.28222700 |

|   |            |             |             |
|---|------------|-------------|-------------|
| H | 3.40929600 | -0.69086300 | -0.14794300 |
| H | 2.42039100 | 0.07670700  | 0.91776700  |

1

2 **(SA)<sub>1</sub>·(DSA)<sub>1</sub>:**

| Atoms | X           | Y           | Z           |
|-------|-------------|-------------|-------------|
| S     | -2.47894500 | -0.27718400 | -0.07642800 |
| O     | -1.96942000 | -0.69986700 | 1.32142600  |
| O     | -3.71936500 | -0.91541600 | -0.30294600 |
| O     | -1.39496600 | -0.39448700 | -1.03015800 |
| O     | -2.68689900 | 1.27963100  | 0.02947600  |
| H     | 0.13413900  | -1.35148000 | -1.27363600 |
| H     | -3.55012600 | 1.46532400  | 0.42365200  |
| S     | 1.71348900  | -1.27742400 | 0.10594200  |
| O     | 2.93138800  | -1.97706900 | 0.17828500  |
| O     | 1.10381000  | -1.47119600 | -1.31475600 |
| O     | 0.67953600  | -1.42141800 | 1.07950900  |
| S     | 1.13845700  | 1.55591000  | 0.08489700  |
| O     | 0.10562700  | 1.27156800  | 1.02340900  |
| O     | 0.55626500  | 1.50979600  | -1.35863100 |
| O     | 1.99771500  | 2.66524800  | 0.18881000  |
| O     | 2.17216200  | 0.28353900  | 0.05759200  |
| H     | -0.99604700 | -0.58635500 | 1.38700300  |
| H     | -0.27344600 | 0.98808800  | -1.36114300 |

3

4 **(SA)<sub>1</sub>·(DSA)<sub>1</sub>·(A)<sub>1</sub>:**

| Atoms | X           | Y           | Z           |
|-------|-------------|-------------|-------------|
| N     | 0.13203900  | -0.69865100 | 2.57081600  |
| H     | -0.09820600 | 0.24085300  | 2.88663600  |
| H     | 0.94687800  | -0.61472500 | 1.91851700  |
| H     | 0.36650600  | -1.29661600 | 3.35702000  |
| S     | -1.36558700 | -1.43866900 | -0.41236900 |
| O     | -1.93814100 | -2.27300500 | -1.40003200 |
| O     | -2.05721700 | -1.34463300 | 0.88102700  |
| O     | 0.07046500  | -1.46827700 | -0.22323000 |
| S     | -1.64689100 | 1.38540600  | -0.13002500 |
| O     | -0.51624200 | 1.25992200  | 0.76902000  |
| O     | -2.95619100 | 1.18333900  | 0.69692800  |
| O     | -1.78524200 | 2.53966300  | -0.92557400 |
| O     | -1.64573200 | 0.12543300  | -1.08303700 |
| H     | -0.67833000 | -1.06704400 | 2.04175900  |
| H     | -2.98291100 | 0.24564200  | 0.98396400  |
| S     | 2.84196800  | 0.16905200  | -0.13063300 |
| O     | 4.17836600  | 0.57355300  | -0.33440900 |
| O     | 2.40700700  | -0.23359000 | 1.19157800  |

|   |            |             |             |
|---|------------|-------------|-------------|
| O | 2.54895000 | -0.98628800 | -1.13465400 |
| O | 1.88912300 | 1.31567200  | -0.60376200 |
| H | 1.63256100 | -1.30885000 | -0.99865200 |
| H | 1.05622000 | 1.30436200  | -0.08737600 |

1

2 **(SA)<sub>1</sub>·(DSA)<sub>1</sub>·(A)<sub>2</sub>:**

| Atoms | X           | Y           | Z           |
|-------|-------------|-------------|-------------|
| N     | 0.18558600  | -0.42777500 | 2.69341100  |
| H     | 0.42446900  | 0.41891100  | 2.13776300  |
| H     | 0.22002000  | -0.23493600 | 3.68889300  |
| H     | -0.77044100 | -0.65607300 | 2.38916300  |
| S     | 1.50115100  | -1.38977600 | -0.01360500 |
| O     | 1.96564300  | -1.72651000 | -1.33444200 |
| O     | 0.06199800  | -1.08823200 | 0.00995300  |
| O     | 1.91464000  | -2.21104900 | 1.09420700  |
| S     | 1.56569400  | 1.50356200  | -0.05508300 |
| O     | 0.35142500  | 1.60111000  | 0.79620900  |
| O     | 1.20883500  | 1.38127000  | -1.45768000 |
| O     | 2.59905500  | 2.41327900  | 0.28396600  |
| O     | 2.20419300  | 0.04782600  | 0.39472500  |
| H     | 0.83092700  | -1.18798700 | 2.43214500  |
| H     | 0.21262400  | 0.35027500  | -2.19677800 |
| N     | -0.21950900 | -0.47968000 | -2.68577800 |
| H     | 0.42816900  | -1.25280800 | -2.47932300 |
| H     | -1.13410900 | -0.66252500 | -2.26849900 |
| H     | -0.29905600 | -0.31804400 | -3.68415100 |
| S     | -2.73864200 | 0.13718200  | 0.13240900  |
| O     | -2.33692000 | -0.04611600 | 1.50407700  |
| O     | -4.06757200 | 0.49138800  | -0.19509100 |
| O     | -2.44593300 | -1.22129500 | -0.64152200 |
| O     | -1.75846000 | 1.12418900  | -0.55316500 |
| H     | -1.57732400 | -1.54280100 | -0.31762000 |
| H     | -0.92428500 | 1.29579400  | 0.01554000  |

3

4 **(SA)<sub>1</sub>·(DSA)<sub>2</sub>:**

| Atoms | X           | Y           | Z           |
|-------|-------------|-------------|-------------|
| S     | -0.13767500 | -0.19715200 | 0.54525800  |
| O     | -0.42207900 | -0.86585500 | -0.82014700 |
| O     | 1.04200900  | -0.83307100 | 1.05116300  |
| O     | -1.32800500 | -0.19667000 | 1.36133700  |
| O     | 0.13514300  | 1.29151800  | 0.24366200  |
| H     | -2.91156200 | -1.13032000 | 1.55389200  |
| H     | 1.03801800  | 1.39817800  | -0.15275000 |
| S     | -4.24938800 | -1.33970400 | -0.04918500 |
| O     | -5.44989800 | -2.06032700 | -0.17755700 |

|   |             |             |             |
|---|-------------|-------------|-------------|
| O | -3.87733800 | -1.24265900 | 1.46229700  |
| O | -3.07393000 | -1.64456800 | -0.79753900 |
| S | -3.65868400 | 1.46022300  | -0.45922500 |
| O | -2.48142200 | 1.03228800  | -1.14047400 |
| O | -3.32838200 | 1.69077400  | 1.04492400  |
| O | -4.47160300 | 2.51468100  | -0.91136100 |
| O | -4.69233600 | 0.19551500  | -0.37449900 |
| H | -1.35522900 | -0.72140200 | -1.09153900 |
| H | -2.50681500 | 1.21314800  | 1.27796200  |
| S | 3.72256900  | 1.38395500  | 0.20360800  |
| O | 3.64169600  | 2.20232700  | 1.34451500  |
| O | 2.62269000  | 1.26632800  | -0.71430700 |
| O | 5.01531700  | 1.72818200  | -0.57990200 |
| S | 4.25886000  | -1.36865400 | -0.29821200 |
| O | 4.98229300  | -0.86284300 | -1.41906500 |
| O | 2.81420000  | -1.62226000 | -0.77565200 |
| O | 4.75478800  | -2.39492500 | 0.52939100  |
| O | 4.04465200  | -0.10690900 | 0.75229600  |
| H | 5.18141100  | 1.04151100  | -1.25808700 |
| H | 2.16089400  | -1.55201000 | -0.03802000 |

1

2

**(SA)<sub>1</sub>·(DSA)<sub>2</sub>·(A)<sub>1</sub>:**

| Atoms | X           | Y           | Z           |
|-------|-------------|-------------|-------------|
| N     | -1.03477100 | -1.42131200 | 2.23680900  |
| H     | -1.12479800 | -1.61683800 | 3.22835100  |
| H     | -1.02403900 | -0.40937600 | 2.05950300  |
| H     | -0.13593600 | -1.76980700 | 1.87236500  |
| S     | -2.19075800 | -1.64299100 | -0.90140900 |
| O     | -2.28576800 | -2.33434400 | -2.13022700 |
| O     | -2.92530400 | -2.18564200 | 0.24468400  |
| O     | -0.88408400 | -1.14090100 | -0.49689600 |
| S     | -3.68951300 | 0.63285700  | -0.05946400 |
| O     | -2.70238300 | 0.72145300  | 0.99671100  |
| O     | -4.85219400 | -0.29167500 | 0.41526500  |
| O     | -4.23884800 | 1.81821000  | -0.58951400 |
| O     | -3.05939400 | -0.19546700 | -1.24856300 |
| H     | -1.80709100 | -1.83095200 | 1.69067400  |
| H     | -4.48747100 | -1.19327100 | 0.53514400  |
| S     | 0.15228100  | 1.95387800  | 0.53584900  |
| O     | 1.27606900  | 2.82182300  | 0.32007600  |
| O     | 0.26759000  | 0.92056200  | 1.52846900  |
| O     | -0.25845800 | 1.33727700  | -0.81415400 |
| O     | -1.02023000 | 2.91465900  | 0.88504600  |
| H     | -0.46549600 | 0.35646300  | -0.72440200 |
| H     | -1.82682100 | 2.37519200  | 1.01264400  |

|   |            |             |             |
|---|------------|-------------|-------------|
| S | 2.70599300 | -1.36719900 | 0.84693600  |
| O | 1.53748600 | -2.07068700 | 1.25335000  |
| O | 3.48880900 | -0.61750600 | 1.75521000  |
| O | 3.56491500 | -2.40057400 | 0.05893500  |
| S | 3.31947100 | 0.57499500  | -1.12424400 |
| O | 4.51717300 | -0.19412300 | -1.22251200 |
| O | 3.56072300 | 1.67250700  | -0.08237600 |
| O | 2.60229600 | 1.03068700  | -2.24998800 |
| O | 2.20362900 | -0.38844900 | -0.34690900 |
| H | 4.30165600 | -1.92828500 | -0.37622400 |
| H | 2.71759900 | 2.19893600  | 0.06872900  |

1

2 (SA)<sub>1</sub>·(DSA)<sub>2</sub>·(A)<sub>2</sub>:

| Atoms | X           | Y           | Z           |
|-------|-------------|-------------|-------------|
| N     | 2.39985100  | -2.97995600 | 0.60863900  |
| H     | 2.17249700  | -2.21230000 | 1.25885300  |
| H     | 2.57937300  | -3.84211400 | 1.11296400  |
| H     | 1.60459000  | -3.08625700 | -0.04273300 |
| S     | 3.31532100  | -0.21618600 | -0.95088900 |
| O     | 3.58748000  | 0.62663000  | -2.08297800 |
| O     | 1.98642200  | -0.80122700 | -0.93595000 |
| O     | 4.34509900  | -1.10208900 | -0.48385400 |
| S     | 2.33992100  | 0.78348200  | 1.55891700  |
| O     | 2.53468400  | -0.55602700 | 2.03829900  |
| O     | 0.88097200  | 0.87157200  | 0.98400900  |
| O     | 2.56748000  | 1.90201600  | 2.39036100  |
| O     | 3.20779200  | 1.01301900  | 0.25964700  |
| H     | 3.23400600  | -2.65890000 | 0.09906500  |
| H     | 0.47258700  | -0.07798300 | 0.88607700  |
| N     | 0.81514100  | 1.54421200  | -2.05391900 |
| H     | 0.65845800  | 2.21477100  | -1.29197200 |
| H     | 0.30450100  | 1.87433700  | -2.86894500 |
| H     | 1.81990700  | 1.42934000  | -2.25445900 |
| S     | -0.70849400 | -1.79353700 | -0.45413700 |
| O     | -0.07798500 | -3.01896600 | -0.85366300 |
| O     | -0.27175700 | -1.31509900 | 0.86688700  |
| O     | -0.83967000 | -0.74372800 | -1.42950700 |
| S     | -3.47843400 | -1.35259700 | 0.22474100  |
| O     | -3.52221500 | -0.25603700 | -0.69939800 |
| O     | -3.05481600 | -0.80518700 | 1.62040800  |
| O     | -4.57870700 | -2.21569500 | 0.38950700  |
| O     | -2.26460300 | -2.32654000 | -0.16495100 |
| H     | 0.42797600  | 0.62807900  | -1.77000500 |
| H     | -2.60391400 | 0.05457400  | 1.51595600  |
| S     | -1.88607500 | 2.69154700  | -0.16408000 |



|   |             |            |             |
|---|-------------|------------|-------------|
| O | -0.65403000 | 3.41090800 | -0.29487200 |
| O | -3.12494300 | 3.33110600 | 0.05919000  |
| O | -1.69047700 | 1.63600100 | 1.01999500  |
| O | -1.93571200 | 1.76832800 | -1.42330600 |
| H | -0.73585700 | 1.59045200 | 1.23386600  |
| H | -2.51499400 | 0.98098000 | -1.27315900 |

1

2 (SA)<sub>1</sub>·(DSA)<sub>2</sub>·(A)<sub>3</sub>:

| Atoms | X           | Y           | Z           |
|-------|-------------|-------------|-------------|
| N     | -2.51999000 | -2.10255300 | 1.68586100  |
| H     | -2.66179000 | -1.94588000 | 0.67966300  |
| H     | -2.88384800 | -3.00536300 | 1.96981700  |
| H     | -1.51136500 | -2.01395400 | 1.90962400  |
| S     | -2.73989300 | 1.10681500  | 1.23034100  |
| O     | -2.38587200 | 2.48758500  | 1.45205300  |
| O     | -1.65059400 | 0.29235300  | 0.71447900  |
| O     | -3.53154300 | 0.46062000  | 2.24748400  |
| S     | -3.81546900 | 0.17596300  | -1.25519500 |
| O     | -3.67324900 | -1.13779200 | -0.69403000 |
| O     | -2.54198900 | 0.54713500  | -2.06140500 |
| O     | -4.93861000 | 0.50740900  | -2.04414200 |
| O     | -3.80396100 | 1.25309900  | -0.07405800 |
| H     | -3.02102900 | -1.32637600 | 2.14822300  |
| H     | -1.71148000 | 0.16036600  | -1.69197600 |
| N     | 4.28888900  | -2.20923500 | -0.37897100 |
| H     | 3.90506700  | -2.44111100 | -1.29262600 |
| H     | 5.08427200  | -2.79218000 | -0.14274400 |
| H     | 4.54173900  | -1.20721700 | -0.38478000 |
| S     | 1.10942300  | -1.46982700 | 1.37569600  |
| O     | 0.15094400  | -1.78817000 | 2.40158700  |
| O     | 1.42114800  | -0.04776800 | 1.23348500  |
| O     | 2.29522500  | -2.30630200 | 1.39074000  |
| S     | 0.69839600  | -1.26214200 | -1.47194400 |
| O     | 2.15541900  | -1.04750100 | -1.39728200 |
| O     | 0.00674800  | 0.01401300  | -1.54204200 |
| O     | 0.26632900  | -2.29456200 | -2.34625300 |
| O     | 0.29343300  | -1.87714900 | 0.02076000  |
| H     | 3.50472000  | -2.30252900 | 0.32175800  |
| H     | 0.05203000  | 2.06645500  | -0.77843200 |
| N     | 0.15956600  | 2.27891000  | 0.21401300  |
| H     | 0.36619600  | 1.36859900  | 0.65698600  |
| H     | 0.94159700  | 2.91453100  | 0.35014800  |
| H     | -0.72450100 | 2.63213900  | 0.61640100  |
| S     | 3.81394200  | 1.73522600  | -0.19005900 |
| O     | 4.59950600  | 0.52861500  | -0.11261600 |

|   |            |            |             |
|---|------------|------------|-------------|
| O | 4.41694100 | 2.96511800 | -0.53974200 |
| O | 3.12055100 | 1.96111700 | 1.20416100  |
| O | 2.60644900 | 1.47467000 | -1.13553900 |
| H | 2.67064600 | 1.12637400 | 1.46726000  |
| H | 2.43113500 | 0.47981800 | -1.23816300 |

1

2 **(DSA)<sub>1</sub>·(A)<sub>1</sub>:**

| Atoms | X           | Y           | Z           |
|-------|-------------|-------------|-------------|
| N     | 1.39103700  | 2.49577300  | 0.05425100  |
| H     | 0.36403100  | 2.43206600  | 0.07924100  |
| H     | 1.70913000  | 3.36997100  | -0.34808000 |
| H     | 1.75204800  | 2.36086900  | 0.99506100  |
| S     | 1.23309500  | -0.70744200 | -0.02208000 |
| O     | 1.74993600  | -2.02510400 | 0.01713200  |
| O     | 1.05815300  | 0.00463100  | 1.24344400  |
| O     | 1.75554200  | 0.17671500  | -1.05951900 |
| S     | -1.52632100 | 0.03673600  | -0.12635900 |
| O     | -1.06629500 | 1.37280200  | -0.39993600 |
| O     | -1.61646800 | -0.16517600 | 1.42380200  |
| O     | -2.72809900 | -0.42868500 | -0.69974800 |
| O     | -0.38253900 | -0.98851200 | -0.52357100 |
| H     | 1.67058800  | 1.62863800  | -0.51876000 |
| H     | -0.70326600 | -0.10404300 | 1.77497600  |

3

4 **(SA)<sub>2</sub>:**

| Atoms | X           | Y           | Z           |
|-------|-------------|-------------|-------------|
| S     | -2.01322700 | -0.06909400 | 0.12032000  |
| O     | -1.03993500 | 0.02070700  | 1.17305600  |
| O     | -3.33344600 | -0.50822700 | 0.37973100  |
| O     | -2.03861500 | 1.38798500  | -0.49770200 |
| H     | -2.80898000 | 1.47208500  | -1.07474100 |
| O     | -1.44840100 | -0.93353400 | -1.03975000 |
| H     | -0.49362800 | -0.70536900 | -1.17055400 |
| O     | 1.03990200  | -0.02023300 | -1.17304000 |
| S     | 2.01323800  | 0.06911400  | -0.12030200 |
| O     | 1.44861400  | 0.93342700  | 1.03995600  |
| O     | 3.33355800  | 0.50799300  | -0.37963200 |
| O     | 2.03830500  | -1.38810900 | 0.49739500  |
| H     | 0.49378000  | 0.70547900  | 1.17068500  |
| H     | 2.80879500  | -1.47259300 | 1.07421100  |

5

6 **(SA)<sub>2</sub>·(A)<sub>1</sub>:**

| Atoms | X           | Y           | Z           |
|-------|-------------|-------------|-------------|
| S     | -1.75156900 | -0.35106400 | -0.05309700 |

|   |             |             |             |
|---|-------------|-------------|-------------|
| O | -1.08755700 | 0.22332400  | 1.13077400  |
| O | -0.97588400 | -1.41957800 | -0.65807100 |
| O | -3.09267400 | -1.03007100 | 0.46440300  |
| H | -2.87930000 | -1.91566500 | 0.78109800  |
| O | -2.22526600 | 0.68973700  | -0.94849600 |
| H | -1.40930200 | 2.07376900  | -0.49615300 |
| O | 1.36347800  | 1.03234300  | -0.60427700 |
| S | 2.05584200  | -0.10297800 | -0.02123500 |
| O | 1.42781100  | -0.37315300 | 1.37706700  |
| O | 3.46255300  | -0.06302900 | 0.11092600  |
| O | 1.68407300  | -1.36217100 | -0.85448200 |
| H | 0.44072100  | -0.19621900 | 1.34104900  |
| H | 0.69686100  | -1.43307500 | -0.90284700 |
| N | -0.68866100 | 2.67273600  | -0.01622200 |
| H | 0.21057600  | 2.15515800  | -0.14127600 |
| H | -0.92046500 | 2.68070400  | 0.97367200  |
| H | -0.63909600 | 3.61164500  | -0.39543300 |

1

2

**(SA)<sub>2</sub>·(DSA)<sub>1</sub>:**

| Atoms | X           | Y           | Z           |
|-------|-------------|-------------|-------------|
| S     | -0.38040400 | 2.37720100  | -0.13492600 |
| O     | 0.95898800  | 2.43967100  | -0.65606200 |
| O     | -1.01498400 | 3.53934700  | 0.35802100  |
| O     | -0.44607500 | 1.24514500  | 0.94980400  |
| O     | -1.23762100 | 1.73931800  | -1.28917300 |
| H     | 0.45992400  | 0.91391300  | 1.14848700  |
| H     | -2.16452700 | 1.66024100  | -0.98698100 |
| S     | 3.03468600  | -0.04900600 | 0.38831200  |
| O     | 4.36227200  | -0.37422900 | 0.71647800  |
| O     | 2.10425900  | 0.44800300  | 1.35549600  |
| O     | 2.99023300  | 0.81161800  | -0.88013400 |
| S     | 0.86885900  | -1.78465100 | -0.33732000 |
| O     | 0.53272600  | -0.55361100 | -1.23971400 |
| O     | 0.23489600  | -1.62448100 | 0.94063200  |
| O     | 0.77924400  | -3.01106800 | -1.02731300 |
| O     | 2.43502400  | -1.49119900 | -0.17509300 |
| H     | 2.17795700  | 1.39648200  | -0.87701700 |
| H     | -1.39391400 | -1.26302900 | 1.38570900  |
| S     | -2.96705500 | -0.64644500 | 0.14770400  |
| O     | -3.36927100 | 0.71968200  | 0.16497100  |
| O     | -2.35708900 | -1.08137700 | 1.50688100  |
| O     | -2.10529400 | -1.10763400 | -0.91020900 |
| O     | -4.29625200 | -1.47255000 | 0.13445800  |
| H     | -0.44432900 | -0.46082900 | -1.30637800 |
| H     | -4.10093900 | -2.41344200 | 0.02347800  |

1

2 **(SA)<sub>2</sub>·(DSA)<sub>1</sub>·(A)<sub>1</sub>:**

| Atoms | X           | Y           | Z           |
|-------|-------------|-------------|-------------|
| N     | -2.03199700 | 1.98480500  | -1.64025700 |
| H     | -1.40392200 | 1.17426900  | -1.74782000 |
| H     | -1.53675100 | 2.66815700  | -1.04061700 |
| H     | -2.25526800 | 2.38840900  | -2.54470100 |
| S     | -2.59331100 | -0.03211400 | 1.00826000  |
| O     | -3.13042900 | -0.41251300 | 2.25993300  |
| O     | -3.43575700 | -0.15204100 | -0.17559500 |
| O     | -1.79000600 | 1.18171000  | 0.95612300  |
| S     | -1.06821400 | -1.75031000 | -0.69886200 |
| O     | -0.83454200 | -0.61428400 | -1.53861000 |
| O     | -2.38448600 | -2.46812600 | -1.12841000 |
| O     | -0.08021100 | -2.76573000 | -0.57650200 |
| O     | -1.39196900 | -1.26092000 | 0.76403200  |
| H     | -2.86794900 | 1.63509300  | -1.16362500 |
| H     | -3.11850900 | -1.82768600 | -1.02985200 |
| S     | 0.99253100  | 2.58597200  | -0.06545800 |
| O     | 2.31430600  | 3.06556300  | 0.07615000  |
| O     | -0.13468500 | 3.47523500  | -0.12881100 |
| O     | 0.76055700  | 1.55675500  | 1.10954800  |
| O     | 0.83323900  | 1.68485500  | -1.33551900 |
| H     | -0.21588200 | 1.35518400  | 1.17860100  |
| H     | 1.37762100  | 0.85706100  | -1.23959500 |
| S     | 2.92117500  | -1.17009800 | 0.17926700  |
| O     | 2.11734600  | -0.52247000 | -0.83473000 |
| O     | 4.32691400  | -1.04191600 | 0.16236900  |
| O     | 2.57646400  | -2.68366900 | 0.17346500  |
| O     | 2.33759300  | -0.74343400 | 1.57442000  |
| H     | 1.63178400  | -2.79781200 | -0.05997800 |
| H     | 1.90330300  | 0.12639500  | 1.49517100  |

3

4 **(SA)<sub>2</sub>·(DSA)<sub>1</sub>·(A)<sub>2</sub>:**

| Atoms | X           | Y           | Z           |
|-------|-------------|-------------|-------------|
| N     | 0.37554800  | -1.94641900 | -1.19044400 |
| H     | 1.10152200  | -1.78793200 | -0.45780800 |
| H     | 0.49176900  | -2.87550900 | -1.58466100 |
| H     | -0.56877500 | -1.85210700 | -0.78569300 |
| S     | 0.01581700  | 1.31307000  | -1.30660200 |
| O     | -0.27709000 | 2.72030900  | -1.27608500 |
| O     | -1.17174400 | 0.48116700  | -1.11612100 |
| O     | 0.90357700  | 0.82369400  | -2.34019100 |
| S     | 0.31077000  | 0.68614600  | 1.50570400  |
| O     | -0.32304200 | -0.62580800 | 1.37308800  |

|   |             |             |             |
|---|-------------|-------------|-------------|
| O | -0.64625700 | 1.74801000  | 1.74019400  |
| O | 1.49705000  | 0.71297700  | 2.31264800  |
| O | 0.95896800  | 0.98338000  | 0.01051100  |
| H | 0.49603500  | -1.23497000 | -1.91794500 |
| H | -2.03214000 | 2.09923600  | 0.89843200  |
| N | -2.72325200 | 2.43947000  | 0.18581000  |
| H | -2.14321900 | 2.79726600  | -0.58475100 |
| H | -3.27583900 | 1.63896600  | -0.13185000 |
| H | -3.32038800 | 3.16488700  | 0.56963900  |
| S | -3.41466400 | -1.30065100 | 0.07381000  |
| O | -2.37658300 | -2.17078600 | -0.41370200 |
| O | -4.67380900 | -1.80520200 | 0.46861500  |
| O | -3.71357400 | -0.22862500 | -1.07018900 |
| O | -2.83273700 | -0.40995400 | 1.20157200  |
| H | -2.86015200 | -0.04355200 | -1.50688500 |
| H | -1.81381500 | -0.52518900 | 1.27121100  |
| S | 3.66868100  | -0.79997200 | 0.02627400  |
| O | 2.50831000  | -1.54112300 | 0.47078700  |
| O | 4.92447100  | -1.44102500 | -0.06521800 |
| O | 3.78546500  | 0.46683400  | 0.91790700  |
| O | 3.37802700  | -0.22512800 | -1.40741800 |
| H | 2.97442700  | 0.56466400  | 1.47705500  |
| H | 2.56660500  | 0.31564000  | -1.45246500 |

1

2 (SA)<sub>2</sub>·(DSA)<sub>1</sub>·(A)<sub>3</sub>:

| Atoms | X           | Y           | Z           |
|-------|-------------|-------------|-------------|
| S     | -1.80849800 | -1.01399400 | 1.02474100  |
| O     | -0.54273300 | -1.58061900 | 0.58457100  |
| O     | -2.15158000 | -0.11014500 | -0.36807300 |
| O     | -2.91535200 | -1.92415700 | 1.14355100  |
| O     | -1.66344800 | -0.03750700 | 2.07929300  |
| H     | 0.10055600  | 0.11328700  | 2.41451400  |
| H     | 1.48544900  | -0.43593600 | 3.21530000  |
| N     | 1.13424800  | 0.05518400  | 2.40052800  |
| H     | 1.54080900  | 0.99730700  | 2.30895300  |
| H     | 1.40510500  | -0.43611500 | 1.52817400  |
| H     | 5.13196300  | 0.54475400  | -0.22677100 |
| N     | 4.23247000  | 0.99212800  | -0.36818300 |
| H     | 3.43218600  | 0.27879700  | -0.29620900 |
| H     | 4.00222100  | 1.69398800  | 0.34514400  |
| H     | 0.83981600  | -0.90516900 | -2.26305100 |
| N     | 0.27505000  | -0.10532700 | -1.94439400 |
| H     | -0.52814700 | 0.07914700  | -2.53904700 |
| H     | -0.05264100 | -0.35783800 | -1.00606300 |
| S     | 2.56157100  | -2.02383300 | -0.47451600 |

|   |             |             |             |
|---|-------------|-------------|-------------|
| O | 2.19644000  | -0.61865600 | -0.08319200 |
| O | 3.97940400  | -2.22043500 | -0.40538000 |
| O | 1.94156800  | -2.91038100 | 0.69375600  |
| O | 1.88028700  | -2.38416200 | -1.70168600 |
| H | 0.97260000  | -2.85702100 | 0.62166600  |
| H | 0.86658600  | 0.73570200  | -1.83018600 |
| S | 1.38361100  | 2.60826200  | 0.07654500  |
| O | 0.83332600  | 3.92721700  | 0.10887600  |
| O | 1.89358600  | 2.14005400  | -1.21373700 |
| O | 2.32460900  | 2.28321700  | 1.16224600  |
| O | 0.13333700  | 1.59669600  | 0.36321000  |
| H | 4.16749000  | 1.44454800  | -1.27605700 |
| H | -0.65278500 | 2.12465900  | 0.55465700  |
| O | -4.19406000 | 0.99054300  | 0.45010500  |
| S | -3.66425200 | 0.35803100  | -0.70272000 |
| O | -4.35878500 | -1.01987600 | -0.95511300 |
| H | -4.23211000 | -1.57151500 | -0.15602900 |
| O | -3.54789600 | 1.00596800  | -1.95785900 |

1 **(SA)<sub>2</sub>·(A)<sub>2</sub>:**

| Atoms | X           | Y           | Z           |
|-------|-------------|-------------|-------------|
| S     | -1.99375600 | 0.03950600  | -0.14679700 |
| O     | -1.96770800 | 1.49843900  | -0.07048200 |
| O     | -3.42358600 | -0.32337200 | -0.76178300 |
| O     | -1.06994700 | -0.54333200 | -1.10365000 |
| O     | -1.92152200 | -0.59640400 | 1.16575700  |
| H     | -0.60468900 | 2.18376200  | 0.65313600  |
| H     | -4.09078700 | 0.17534600  | -0.27653000 |
| S     | 2.10772600  | -0.06533300 | -0.21735300 |
| O     | 1.97293600  | -1.43365000 | -0.71671300 |
| O     | 1.24928600  | 0.86001100  | -1.20138700 |
| O     | 1.39488600  | 0.04212900  | 1.09037500  |
| O     | 3.41196200  | 0.51312500  | -0.22105800 |
| H     | 0.78789600  | -2.09192900 | 0.15000000  |
| H     | 0.39594100  | 0.39985400  | -1.36649500 |
| N     | 0.14396100  | -2.41317300 | 0.93378300  |
| H     | -0.18316600 | -3.36112700 | 0.78560100  |
| H     | 0.68671400  | -2.34759800 | 1.79018800  |
| H     | -0.66121400 | -1.75146700 | 1.00977700  |
| N     | 0.35234900  | 2.40999100  | 1.00848400  |
| H     | 0.31970800  | 3.00004000  | 1.83116400  |
| H     | 0.83110500  | 1.45569800  | 1.19383700  |
| H     | 0.87614100  | 2.85816600  | 0.26091400  |

2

3 **(DSA)<sub>2</sub>:**

| Atoms | X           | Y           | Z           |
|-------|-------------|-------------|-------------|
| S     | -1.41878100 | 1.52046200  | 0.51265300  |
| O     | -2.69600800 | 1.97749800  | 0.90202900  |
| O     | -0.39509500 | 2.40403200  | 0.05763000  |
| O     | -0.75177200 | 0.64196100  | 1.62143800  |
| S     | -2.65392900 | -0.79452000 | -0.54100600 |
| O     | -2.73115000 | -1.07079200 | 0.85848300  |
| O     | -1.80259400 | -1.85627700 | -1.27089700 |
| O     | -3.78153000 | -0.49664300 | -1.32645800 |
| O     | -1.57710700 | 0.46231900  | -0.69698500 |
| H     | -1.38737800 | -0.03921100 | 1.91527500  |
| H     | -1.03860300 | -2.10977000 | -0.70346300 |
| S     | 1.43272500  | -1.42786500 | 0.61381900  |
| O     | 0.20872500  | -2.15792100 | 0.53160200  |
| O     | 1.89523500  | -0.87495500 | 1.82812300  |
| O     | 2.52147400  | -2.31436100 | -0.06327000 |
| S     | 2.44729400  | 0.86296800  | -0.70395500 |
| O     | 3.67656900  | 0.18828700  | -0.45870600 |
| O     | 2.18502300  | 1.79960000  | 0.49286900  |
| O     | 2.11650400  | 1.45421600  | -1.94014200 |
| O     | 1.23916000  | -0.25844100 | -0.48932200 |
| H     | 3.36139800  | -1.81848000 | -0.08343700 |
| H     | 1.28815800  | 2.20254100  | 0.39631900  |

1

2 **(DSA)<sub>2</sub>(A)<sub>1</sub>:**

| Atoms | X           | Y           | Z           |
|-------|-------------|-------------|-------------|
| N     | 0.28528300  | -0.68180100 | 2.62406700  |
| H     | -0.59378800 | -1.13366900 | 2.31464700  |
| H     | 0.27206000  | -0.49647800 | 3.62203400  |
| H     | 1.08812700  | -1.25863900 | 2.37430700  |
| S     | 2.45668400  | 0.93644500  | 0.59608300  |
| O     | 3.40054900  | 1.94222600  | 0.28413100  |
| O     | 2.88064400  | -0.20857200 | 1.38851400  |
| O     | 1.12728500  | 1.39851800  | 1.01624900  |
| S     | 1.59351700  | -1.22494400 | -1.03439800 |
| O     | 0.55866300  | -1.39660200 | -0.03502300 |
| O     | 2.83912900  | -2.06307100 | -0.60091300 |
| O     | 1.30960300  | -1.50589800 | -2.38480900 |
| O     | 2.14918600  | 0.25504200  | -0.93662500 |
| H     | 0.41679800  | 0.19733500  | 2.08473200  |
| H     | 3.18096000  | -1.68329900 | 0.23376100  |
| S     | -2.62296000 | -0.90586300 | 0.49237100  |
| O     | -3.99582000 | -0.64698900 | 0.31863500  |
| O     | -2.14273900 | -1.62725200 | 1.63872500  |
| O     | -2.07298100 | -1.52366700 | -0.81588400 |

|   |             |             |             |
|---|-------------|-------------|-------------|
| S | -1.62075800 | 1.49496400  | -0.72878600 |
| O | -0.69288400 | 0.85266600  | -1.58919300 |
| O | -0.96024200 | 2.64782100  | 0.05389400  |
| O | -2.91553400 | 1.88093100  | -1.12983600 |
| O | -1.77844600 | 0.47042000  | 0.60248800  |
| H | -1.09207600 | -1.59167200 | -0.75677100 |
| H | -0.04463700 | 2.37114300  | 0.31995000  |

1

2 **(DSA)<sub>2</sub>'(A)<sub>2</sub>:**

| Atoms | X           | Y           | Z            |
|-------|-------------|-------------|--------------|
| N     | -1.06283000 | -1.26663900 | -2.50840500  |
| H     | -1.03918100 | -0.27055900 | -2.23900800  |
| H     | -0.93182000 | -1.37741500 | -3.50867400  |
| H     | -0.31890200 | -1.75008900 | -1.97521000  |
| S     | -2.88270300 | -0.93204000 | 0.22299100   |
| O     | -3.46280900 | -1.35269200 | 1.47136300   |
| O     | -1.44198300 | -1.10220700 | 0.14781000   |
| O     | -3.57241900 | -1.23958000 | -0.99990400  |
| S     | -2.05086500 | 1.78124200  | -0.28564000  |
| O     | -1.74922600 | 1.32294100  | -1.61454500  |
| O     | -0.76685900 | 1.62319600  | 0.59530600   |
| O     | -2.59651700 | 3.06573600  | -0.06175900  |
| O     | -3.05509900 | 0.76889200  | 0.41330200   |
| H     | -1.98732000 | -1.60247400 | -2.21041200  |
| H     | -0.07675000 | 1.04680300  | 0.12022500   |
| N     | -1.01628000 | -0.40345700 | 2.75278200   |
| H     | -1.11800500 | 0.53300700  | 2.34765300   |
| H     | -0.77687200 | -0.34249400 | 3.73772300   |
| H     | -1.90170500 | -0.91090200 | 2.60434400   |
| S     | 1.45886600  | -1.03894800 | -0.09597300  |
| O     | 1.15452900  | -2.15175700 | -0.95485600  |
| O     | 0.99445000  | 0.25561700  | -0.64545200  |
| O     | 1.20086400  | -1.20109900 | 1.31265500   |
| S     | 3.85701600  | 0.43994700  | 0.16932600   |
| O     | 3.21297600  | 0.98589600  | 1.31245400   |
| O     | 3.53451600  | 1.31556600  | -1.09382700  |
| O     | 5.23236900  | 0.12652400  | 0.12019500   |
| O     | 3.09922200  | -0.94489200 | -0.23284300  |
| H     | -0.25515200 | -0.86263700 | 2.20874100   |
| H     | 2.57035800  | 1.44710200  | -1.12645100S |

3

4

5

6

7

**(SA)<sub>3</sub>:**



| Atoms | X           | Y           | Z           |
|-------|-------------|-------------|-------------|
| S     | 0.16483700  | 1.30605100  | -0.06336500 |
| O     | -0.10407000 | 0.08451900  | -0.80968300 |
| O     | 1.37746300  | 1.98145900  | -0.39595600 |
| H     | 3.11822700  | 1.29813100  | -0.24755100 |
| O     | 0.10199300  | 0.97627800  | 1.45441800  |
| O     | -1.00412300 | 2.28075600  | -0.20277700 |
| O     | 3.82969200  | 0.63311300  | -0.17992300 |
| S     | 3.19659800  | -0.77206100 | 0.08974300  |
| O     | 4.25644700  | -1.69047600 | 0.22901900  |
| O     | 2.44151500  | -1.08907800 | -1.24922900 |
| O     | -2.42010200 | -1.31989300 | -1.02508800 |
| H     | 1.52576000  | -0.75359300 | -1.20077100 |
| H     | -1.54359000 | -0.87259000 | -1.03690100 |
| O     | 2.19850800  | -0.63473100 | 1.12400800  |
| O     | -3.16961700 | 0.85361300  | -0.19755800 |
| H     | 0.83407900  | 0.33942600  | 1.63195900  |
| H     | -1.87447800 | 1.78339100  | -0.18874100 |
| O     | -4.64837000 | -1.13962700 | -0.15465900 |
| S     | -3.36281200 | -0.56330400 | -0.04568500 |
| O     | -2.73563400 | -0.88198700 | 1.36909700  |
| H     | -3.02757700 | -1.75731700 | 1.65756900  |

1

2 **(SA)<sub>3</sub>·(A)<sub>1</sub>:**

| Atoms | X           | Y           | Z           |
|-------|-------------|-------------|-------------|
| N     | -0.04172000 | 0.31393500  | 2.50407500  |
| H     | -0.90969100 | 0.06818900  | 1.98691100  |
| H     | 0.71310500  | -0.29441000 | 2.15097000  |
| H     | -0.17125100 | 0.19382600  | 3.50277600  |
| S     | 1.01542600  | 1.97849500  | -0.14077200 |
| O     | -0.00526000 | 0.92850100  | -0.23378200 |
| O     | 1.18656600  | 2.48449400  | 1.19635500  |
| H     | 0.24693700  | 1.27641200  | 2.27050300  |
| O     | 2.24337900  | 1.55803500  | -0.83387100 |
| S     | -2.86205700 | -0.43166700 | -0.10848500 |
| O     | -2.02181500 | -1.23225400 | -1.15389300 |
| O     | -2.63228000 | 1.05375200  | -0.53246700 |
| O     | -4.23147800 | -0.71882200 | -0.30442500 |
| O     | -2.26109000 | -0.64315900 | 1.19033600  |
| H     | -1.13058000 | -1.44136000 | -0.79715800 |
| H     | -1.66222100 | 1.22940700  | -0.48893400 |
| S     | 1.72178700  | -1.63935800 | -0.07740200 |
| O     | 2.65109800  | -2.91101100 | -0.14869600 |
| O     | 2.16645600  | -0.85899500 | -1.30276100 |
| O     | 0.37004900  | -2.12000700 | -0.20621800 |

|   |            |             |             |
|---|------------|-------------|-------------|
| O | 2.07535500 | -0.93817900 | 1.12542500  |
| H | 2.14919700 | -3.63570300 | -0.54219400 |
| H | 2.22674400 | 0.18299300  | -1.10444000 |
| O | 0.47811700 | 3.22500900  | -0.96825000 |
| H | 0.67455700 | 3.08467700  | -1.90245400 |

1

2

**(SA)<sub>3</sub>·(A)<sub>2</sub>:**

| Atoms | X           | Y           | Z           |
|-------|-------------|-------------|-------------|
| N     | 0.04080800  | 0.04080800  | 0.08780100  |
| H     | -0.76321900 | -0.76321900 | -0.54706000 |
| H     | 0.93979000  | 0.93979000  | -0.41363000 |
| H     | 0.08931200  | 0.08931200  | 0.74907100  |
| N     | -2.34151400 | -2.34151400 | 1.67098900  |
| H     | -3.28639200 | -3.28639200 | 1.34957300  |
| H     | -2.17630400 | -2.17630400 | 2.58799900  |
| H     | -2.22980100 | -2.22980100 | 1.68130600  |
| S     | -3.01773500 | -3.01773500 | -0.12741300 |
| O     | -2.49434500 | -2.49434500 | -1.04838500 |
| O     | -2.99705800 | -2.99705800 | -0.66645800 |
| O     | -2.44011400 | -2.44011400 | 1.21337500  |
| H     | -1.33804100 | -1.33804100 | -1.42890100 |
| S     | 0.27373000  | 0.27373000  | -0.39748000 |
| O     | -0.35916500 | -0.35916500 | -1.49334800 |
| O     | 1.58046200  | 1.58046200  | -0.89844300 |
| O     | -0.64753600 | -0.64753600 | -0.22470400 |
| O     | 0.32340100  | 0.32340100  | 0.84468800  |
| H     | -0.13168800 | -0.13168800 | 0.59204600  |
| H     | -1.66304700 | -1.66304700 | 0.95201500  |
| O     | -4.55140600 | -4.55140600 | 0.11903600  |
| H     | -4.94495500 | -4.94495500 | -0.73381900 |
| S     | 3.42424600  | 3.42424600  | 0.12698000  |
| O     | 3.89261900  | 3.89261900  | -0.32505500 |
| O     | 2.62104500  | 2.62104500  | 1.44668900  |
| O     | 4.56295900  | 4.56295900  | 0.47398200  |
| O     | 2.48760400  | 2.48760400  | -0.85833400 |
| H     | 3.09999000  | 3.09999000  | -0.64371300 |
| H     | 1.79771600  | 1.79771600  | 1.24585300  |

3

4

**(SA)<sub>3</sub>·(A)<sub>3</sub>:**

| Atoms | X          | Y           | Z           |
|-------|------------|-------------|-------------|
| S     | 2.60141600 | -1.19585400 | 0.09028500  |
| O     | 1.48413400 | -2.08386400 | 0.36783500  |
| O     | 3.92882800 | -2.09122400 | 0.15651500  |
| O     | 2.64333500 | -0.67818000 | -1.26933200 |

|   |             |             |             |
|---|-------------|-------------|-------------|
| H | 3.92528500  | -2.56696900 | 0.99505500  |
| S | -2.73331100 | -1.02693500 | 0.00470300  |
| O | -2.78264800 | 0.26465500  | 0.66745400  |
| O | -4.06497900 | -1.75400600 | 0.51531200  |
| O | -2.83320700 | -0.99509200 | -1.44855000 |
| H | -4.30626800 | -2.41338000 | -0.14407300 |
| S | -0.34333100 | 2.24129800  | 0.02140700  |
| O | 0.26545600  | 0.92835600  | -0.28703000 |
| O | -0.60525300 | 2.36316200  | 1.44529000  |
| O | -1.71298000 | 2.30527000  | -0.74363100 |
| O | 0.44986700  | 3.32229000  | -0.55386900 |
| H | 1.94532200  | 2.65273900  | -0.68157200 |
| O | 2.75488900  | -0.16732100 | 1.12583000  |
| N | -0.07985100 | -0.27110800 | 2.17282900  |
| N | 2.80483500  | 2.03905400  | -0.63408200 |
| N | -0.08936400 | -1.27196600 | -1.83994300 |
| H | 3.65956600  | 2.54992200  | -0.82231000 |
| H | 2.84235300  | 1.58042200  | 0.28701900  |
| H | 2.70046200  | 1.23535100  | -1.26789800 |
| H | -2.30374600 | 1.63719400  | -0.32205100 |
| H | 0.20145100  | -1.90642500 | -1.08397800 |
| H | 0.51392500  | -1.39430700 | -2.64518600 |
| H | -1.09237500 | -1.39308200 | -2.03483900 |
| H | 0.03941600  | -0.31894800 | -1.44051300 |
| H | 0.91162700  | -0.26388400 | 1.90403900  |
| H | -0.59002500 | -0.90705900 | 1.52372800  |
| H | -0.45080700 | 0.69119800  | 2.04875500  |
| H | -0.19333800 | -0.58822500 | 3.12877200  |
| O | -1.60662500 | -1.84665700 | 0.45914400  |

1

2 (DSA)<sub>3</sub>:

| Atoms | X           | Y           | Z           |
|-------|-------------|-------------|-------------|
| S     | 0.20058700  | -1.09702200 | -1.15759400 |
| O     | -0.75267800 | -1.23915500 | -2.18655000 |
| O     | 1.41227700  | -1.85381200 | -1.13531800 |
| O     | 0.61345500  | 0.37737400  | -0.92256800 |
| S     | -0.65836100 | -0.58956900 | 1.57248700  |
| O     | -0.96210400 | 0.75850000  | 1.24735200  |
| O     | 0.77513700  | -0.71673600 | 2.11662200  |
| O     | -1.54732800 | -1.36272000 | 2.37363400  |
| O     | -0.58860700 | -1.48732000 | 0.21606500  |
| H     | -0.16170800 | 0.97743800  | -1.06934500 |
| H     | 1.27191500  | 0.13194600  | 1.97015700  |
| S     | 3.16751900  | 1.44593000  | 0.66771900  |
| O     | 2.11537600  | 1.54845200  | 1.62857800  |

|   |             |             |             |
|---|-------------|-------------|-------------|
| O | 3.09683700  | 2.04295000  | -0.61014100 |
| O | 4.47876400  | 1.84417900  | 1.40927300  |
| S | 4.47540600  | -0.76257600 | -0.53237500 |
| O | 5.54265900  | 0.17809900  | -0.57016500 |
| O | 3.70722500  | -0.64915700 | -1.86685400 |
| O | 4.62866300  | -2.09812000 | -0.10838500 |
| O | 3.34601500  | -0.15791000 | 0.52269500  |
| H | 5.23016800  | 1.73824800  | 0.79697400  |
| H | 2.88860200  | -1.19670800 | -1.80949100 |
| S | -2.98114400 | 1.49977200  | -0.86663300 |
| O | -1.70753200 | 1.67676000  | -1.48070000 |
| O | -3.40748300 | 2.24270700  | 0.25560300  |
| O | -4.02611000 | 1.56313900  | -2.02210500 |
| S | -4.31055300 | -0.72598200 | 0.27882700  |
| O | -5.45430200 | -0.01498400 | -0.18075800 |
| O | -4.04308800 | -0.27092900 | 1.73470100  |
| O | -4.13280000 | -2.11690900 | 0.12305200  |
| O | -3.01137400 | -0.09004300 | -0.51251800 |
| H | -4.90978200 | 1.38516300  | -1.65097100 |
| H | -3.27849100 | -0.75983900 | 2.11165600  |

1

2

**(DSA)<sub>3</sub>'(A)<sub>1</sub>:**

| Atoms | X           | Y           | Z           |
|-------|-------------|-------------|-------------|
| N     | 0.23627200  | -1.96073500 | -0.71711400 |
| H     | 0.83135000  | -1.22419300 | -1.11189500 |
| H     | -0.47464300 | -2.24639700 | -1.39057000 |
| H     | 0.84398700  | -2.72280400 | -0.41636300 |
| S     | 2.99428800  | -1.48147900 | 1.19230900  |
| O     | 3.76092700  | -1.69912900 | 2.35965600  |
| O     | 2.97618200  | -2.50494100 | 0.15723500  |
| O     | 1.65954800  | -0.91023800 | 1.36184900  |
| S     | 3.73770700  | 0.04348500  | -1.10731600 |
| O     | 2.32973500  | 0.00638000  | -1.45803700 |
| O     | 4.43420500  | -1.21505500 | -1.70193400 |
| O     | 4.49012600  | 1.18658900  | -1.44125800 |
| O     | 3.86007400  | -0.19336100 | 0.44978000  |
| H     | -0.24547700 | -1.57048500 | 0.10341800  |
| H     | 4.05873700  | -2.00721700 | -1.26167300 |
| S     | -0.48334000 | 1.55748600  | -1.35759100 |
| O     | -1.49019000 | 2.53697800  | -1.24910900 |
| O     | -0.65340400 | 0.31538200  | -2.03458400 |
| O     | 0.83077100  | 2.24481400  | -1.79209600 |
| S     | 0.01972700  | 2.04173200  | 1.42562100  |
| O     | 0.90228500  | 3.08888000  | 1.08400800  |
| O     | 0.56881200  | 1.04469200  | 2.43433600  |

|   |             |             |             |
|---|-------------|-------------|-------------|
| O | -1.32676800 | 2.37093800  | 1.82356100  |
| O | -0.09671100 | 1.01675700  | 0.15251600  |
| H | 1.54102900  | 1.56537600  | -1.84574600 |
| H | 1.12685400  | 0.27775100  | 2.03071400  |
| S | -3.44921300 | -0.97270500 | -1.36363300 |
| O | -2.57837800 | -2.10286000 | -1.27881300 |
| O | -3.54011100 | -0.14399100 | -2.49453500 |
| O | -4.89306500 | -1.38041200 | -0.94914900 |
| S | -2.82890800 | -0.63503300 | 1.37361800  |
| O | -3.87627900 | -1.58120200 | 1.57208600  |
| O | -3.10315200 | 0.61193200  | 2.19430100  |
| O | -1.46587100 | -1.04753600 | 1.46941300  |
| O | -3.03189700 | 0.01798200  | -0.12242900 |
| H | -4.87209300 | -1.81925600 | -0.07695900 |
| H | -2.36253400 | 1.31580500  | 2.08637700  |

1

2 **(DSA)<sub>3</sub>(A)<sub>2</sub>:**

| Atoms | X           | Y           | Z           |
|-------|-------------|-------------|-------------|
| N     | -0.66041100 | -0.35858300 | 2.45263400  |
| H     | -0.30164800 | 0.60118200  | 2.51435900  |
| H     | 0.13690500  | -1.01375200 | 2.54886000  |
| H     | -1.38635500 | -0.52973500 | 3.14244300  |
| S     | -1.08763400 | -2.42013500 | -0.81829300 |
| O     | -0.92506100 | -3.58220100 | -1.60844000 |
| O     | -0.86045500 | -2.52573600 | 0.61572200  |
| O     | -0.77571200 | -1.13423700 | -1.37235000 |
| S     | -3.63437000 | -1.56988600 | 0.31981100  |
| O     | -2.93540100 | -0.28391100 | 0.50457700  |
| O     | -3.31331600 | -2.40553400 | 1.60697800  |
| O     | -5.03221700 | -1.52992000 | 0.13787400  |
| O     | -2.93960200 | -2.33469900 | -0.81200200 |
| H     | -1.04527300 | -0.49920600 | 1.51155700  |
| H     | -2.40339600 | -2.76174800 | 1.49687500  |
| S     | 0.20530000  | 2.89462700  | 0.88943800  |
| O     | 1.33714400  | 2.94939200  | 0.04788300  |
| O     | 0.25296000  | 2.44757400  | 2.24293500  |
| O     | -0.47544400 | 4.30079600  | 0.80227100  |
| S     | -1.89470000 | 2.50362500  | -1.01860100 |
| O     | -2.85501800 | 3.33046000  | -0.37814900 |
| O     | -2.42405800 | 1.15660600  | -1.45459100 |
| O     | -1.02185200 | 3.01980200  | -2.01885500 |
| O     | -0.91574300 | 1.93183600  | 0.22655000  |
| H     | -1.33788000 | 4.30929600  | 1.24666100  |
| H     | -2.69974100 | 0.53578500  | -0.65607200 |
| N     | 1.03465500  | 0.82325900  | -2.03991000 |

|   |            |             |             |
|---|------------|-------------|-------------|
| H | 1.99624500 | 0.81698700  | -2.37849300 |
| H | 0.58203500 | 1.72379100  | -2.20998000 |
| H | 0.48427800 | 0.06373300  | -2.44290500 |
| S | 1.98658500 | -1.16394100 | 0.77541700  |
| O | 1.74077900 | -1.79002200 | 2.04717000  |
| O | 2.01465000 | -2.00086400 | -0.40316200 |
| O | 1.23499400 | 0.07459300  | 0.60205500  |
| S | 4.46328600 | -0.37101000 | -0.34654800 |
| O | 3.66416400 | 0.38622300  | -1.26134800 |
| O | 4.67308900 | -1.81475700 | -0.90706300 |
| O | 5.70869100 | 0.10406900  | 0.11341300  |
| O | 3.58026100 | -0.66051100 | 0.96366800  |
| H | 1.08766400 | 0.63388100  | -1.01491300 |
| H | 3.78917200 | -2.21710600 | -1.02815300 |

1

2

**(DSA)<sub>3</sub>·(A)<sub>3</sub>:**

| Atoms | X           | Y           | Z           |
|-------|-------------|-------------|-------------|
| N     | -4.05000800 | 2.05521800  | 0.68059200  |
| H     | -3.51014800 | 1.42083700  | 1.29826600  |
| H     | -4.55280800 | 2.75404100  | 1.21663400  |
| H     | -3.38727800 | 2.49070700  | 0.02183800  |
| S     | -3.70982800 | -0.79855400 | -0.86879100 |
| O     | -3.66545400 | -1.69780000 | -1.98856500 |
| O     | -2.76191800 | 0.30192500  | -0.92989400 |
| O     | -4.99946600 | -0.42280700 | -0.34966700 |
| S     | -2.19912800 | -1.18221100 | 1.52852400  |
| O     | -2.92812600 | -0.05873700 | 2.06711100  |
| O     | -0.90602200 | -0.76319600 | 0.90343800  |
| O     | -1.98048700 | -2.29294200 | 2.42532700  |
| O     | -3.04115800 | -1.82073900 | 0.33668500  |
| H     | -4.68990400 | 1.43023600  | 0.17066800  |
| H     | -0.79618900 | 0.61522700  | 0.73434400  |
| N     | -0.77890000 | -1.27179600 | -2.07383100 |
| H     | -0.63766100 | -1.47892800 | -1.07740500 |
| H     | -0.00235800 | -1.68416000 | -2.59828100 |
| H     | -1.69853700 | -1.62968500 | -2.35914900 |
| S     | -0.68175800 | 2.36840500  | -0.60726100 |
| O     | -1.86423600 | 3.14656200  | -0.81611300 |
| O     | -0.72484300 | 1.67789900  | 0.75509400  |
| O     | -0.21230200 | 1.49259200  | -1.63105400 |
| S     | 2.01698600  | 3.16437800  | -0.02098600 |
| O     | 2.40645300  | 2.09568000  | -0.86715700 |
| O     | 1.92740500  | 2.67623700  | 1.45088900  |
| O     | 2.60206900  | 4.44669600  | -0.03629300 |
| O     | 0.42311600  | 3.50710000  | -0.33158100 |

---

|   |             |             |             |
|---|-------------|-------------|-------------|
| H | -0.77981000 | -0.24798400 | -2.15438400 |
| H | 1.88253400  | 1.69281500  | 1.46370400  |
| N | 0.77094500  | -2.44957600 | 2.36645400  |
| H | 0.94880600  | -2.77060300 | 1.39942200  |
| H | -0.24778300 | -2.51949200 | 2.55866400  |
| H | 1.33412300  | -2.97011600 | 3.03025900  |
| S | 3.17416700  | -0.52117500 | 0.62509800  |
| O | 4.31012800  | 0.31723600  | 0.61852700  |
| O | 3.47541800  | -1.90225100 | 1.33214900  |
| O | 1.97394100  | -0.05823100 | 1.29584500  |
| S | 2.24319400  | -2.53933000 | -1.24683200 |
| O | 1.09604000  | -2.68755800 | -0.36751100 |
| O | 3.37940900  | -3.35653200 | -0.91858700 |
| O | 1.91850000  | -2.32776700 | -2.62215400 |
| O | 2.83816600  | -0.93693100 | -0.84147900 |
| H | 1.04413800  | -1.46166300 | 2.35613700  |
| H | 3.86739000  | -2.53385600 | 0.69063500  |

---

1
